# Supplementary material for: The cancer gene WWOX behaves as an inhibitor of SMAD3 transcriptional activity via direct binding
Source: BMC Cancer. 2013 Dec 11;13:593. doi: 10.1186/1471-2407-13-593 (PMC3871008; doi:10.1186/1471-2407-13-593)
Supplement: Additional file 2 — Microarray gene expression data and ChIP Enrichment Analysis data from WWOX-silenced MCF10 cells. Genes up- or down-regulated in WWOX-silenced cells and the ChEA data of predicted transcription factors affected by WWOX silencing. [file 1471-2407-13-593-S2.xls]

## Sheet: shWWOX-A & shWWOX-B q<0.05 UPs
SystematicName	GeneName	ProbeName	Description	p-Values (sh-A)	q-Values (sh-A)	RP-Values (sh-A)	FoldChange (sh-A)	p-Values (sh-B)	q-Values (sh-B)	RP-Values (sh-B)	FoldChange (sh-B)	Average Fold Changes
NM_013409	FST	A_23_P110531	ref|Homo sapiens follistatin (FST), transcript variant FST344, mRNA [NM_013409]	0	0	12.3201	6.75468	0	0	43.2408	3.62166	5.18817
NM_205841	SPINK6	A_23_P92909	ref|Homo sapiens serine peptidase inhibitor, Kazal type 6 (SPINK6), mRNA [NM_205841]	0	0	8.19321	7.49115	1.02046e-05	0.00295302	202.964	2.57861	5.03488
NM_080629	COL11A1	A_33_P3259339	ref|Homo sapiens collagen, type XI, alpha 1 (COL11A1), transcript variant B, mRNA [NM_080629]	0	0	24.8319	5.61805	1.39153e-06	0.000952381	88.9794	4.17084	4.89444
NM_000237	LPL	A_23_P146233	ref|Homo sapiens lipoprotein lipase (LPL), mRNA [NM_000237]	3.06137e-05	0.00571429	295.756	2.67311	0	0	8.24257	6.81036	4.74174
NM_021097	SLC8A1	A_32_P147078	ref|Homo sapiens solute carrier family 8 (sodium/calcium exchanger), member 1 (SLC8A1), transcript variant A, mRNA [NM_021097]	0	0	24.7604	5.22041	0	0	21.9184	4.18219	4.7013
NM_005329	HAS3	A_23_P393034	ref|Homo sapiens hyaluronan synthase 3 (HAS3), transcript variant 1, mRNA [NM_005329]	0	0	9.78195	6.93674	0.000534348	0.0323596	816.355	1.96039	4.44856
NM_007361	NID2	A_23_P163087	ref|Homo sapiens nidogen 2 (osteonidogen) (NID2), mRNA [NM_007361]	0	0	23.1147	5.62011	3.47883e-06	0.00151515	137.733	2.77848	4.1993
NM_001136004	MICAL3	A_33_P3267814	ref|Homo sapiens microtubule associated monoxygenase, calponin and LIM domain containing 3 (MICAL3), transcript variant 2, mRNA [NM_001136004]	0	0	25.329	5.05453	3.94267e-06	0.00161905	149.243	2.82501	3.93977
NM_002185	IL7R	A_23_P404494	ref|Homo sapiens interleukin 7 receptor (IL7R), mRNA [NM_002185]	0	0	23.4892	5.35704	1.83218e-05	0.00431694	240.704	2.51287	3.93495
NM_005325	HIST1H1A	A_23_P70448	ref|Homo sapiens histone cluster 1, H1a (HIST1H1A), mRNA [NM_005325]	0	0	45.2505	4.11525	0	0	36.9102	3.59383	3.85454
NR_024475	LOC100216001	A_33_P3339070	ref|Homo sapiens hypothetical LOC100216001 (LOC100216001), non-coding RNA [NR_024475]	0	0	31.9723	5.01452	1.39153e-05	0.00350877	225.284	2.55562	3.78507
NM_018369	DEPDC1B	A_23_P361419	ref|Homo sapiens DEP domain containing 1B (DEPDC1B), transcript variant 1, mRNA [NM_018369]	0	0	46.167	4.11552	0	0	51.105	3.41809	3.76681
NM_001034	RRM2	A_24_P225616	ref|Homo sapiens ribonucleotide reductase M2 (RRM2), transcript variant 2, mRNA [NM_001034]	2.31922e-07	0.000238095	61.0053	3.74294	0	0	33.6206	3.62566	3.6843
NM_032717	AGPAT9	A_23_P69810	ref|Homo sapiens 1-acylglycerol-3-phosphate O-acyltransferase 9 (AGPAT9), mRNA [NM_032717]	0	0	38.3495	4.33812	1.62345e-06	0.00102941	96.7459	3.01327	3.6757
NM_198965	PTHLH	A_23_P2271	ref|Homo sapiens parathyroid hormone-like hormone (PTHLH), transcript variant 1, mRNA [NM_198965]	0	0	37.6204	4.52157	3.71075e-06	0.00156863	140.112	2.79238	3.65697
NR_026837	TRHDE-AS1	A_33_P3311498	ref|Homo sapiens hypothetical LOC283392 (LOC283392), transcript variant 1, non-coding RNA [NR_026837]	0	0	30.1107	4.99078	5.17185e-05	0.00768966	357.327	2.31201	3.65139
NM_032704	TUBA1C	A_24_P188071	ref|Homo sapiens tubulin, alpha 1c (TUBA1C), mRNA [NM_032704]	0	0	36.602	4.54827	6.95765e-06	0.0023622	176.395	2.62965	3.58896
NM_182898	CREB5	A_23_P157117	ref|Homo sapiens cAMP responsive element binding protein 5 (CREB5), transcript variant 1, mRNA [NM_182898]	0	0	39.2389	4.31985	3.94267e-06	0.00161905	142.068	2.85042	3.58514
NM_006771	KRT38	A_23_P100991	ref|Homo sapiens keratin 38 (KRT38), mRNA [NM_006771]	5.79804e-06	0.00189394	174.851	3.28859	2.3656e-05	0.00463636	268.613	3.85625	3.57242
NM_139314	ANGPTL4	A_33_P3295358	ref|Homo sapiens angiopoietin-like 4 (ANGPTL4), transcript variant 1, mRNA [NM_139314]	0	0	34.1109	4.70546	3.17733e-05	0.00568465	295.265	2.39739	3.55142
NM_144569	SPOCD1	A_23_P431388	ref|Homo sapiens SPOC domain containing 1 (SPOCD1), mRNA [NM_144569]	0	0	40.2929	4.32329	6.02996e-06	0.00209677	166.798	2.71579	3.51954
NM_000885	ITGA4	A_33_P3353816	ref|Homo sapiens integrin, alpha 4 (antigen CD49D, alpha 4 subunit of VLA-4 receptor) (ITGA4), mRNA [NM_000885]	2.31922e-07	0.000238095	72.4933	3.73035	2.31922e-07	0.000238095	72.1663	3.24312	3.48673
NM_005438	FOSL1	A_23_P161624	ref|Homo sapiens FOS-like antigen 1 (FOSL1), mRNA [NM_005438]	6.95765e-07	0.000576923	78.6567	3.62015	0	0	49.8998	3.34923	3.48469
NM_003483	HMGA2	A_23_P95930	ref|Homo sapiens high mobility group AT-hook 2 (HMGA2), transcript variant 1, mRNA [NM_003483]	0	0	49.0178	4.07082	2.31922e-06	0.00119048	118.05	2.88133	3.47607
NM_144497	AKAP12	A_23_P214897	ref|Homo sapiens A kinase (PRKA) anchor protein 12 (AKAP12), transcript variant 2, mRNA [NM_144497]	0	0	42.4975	4.40452	5.65889e-05	0.00810631	369.562	2.29754	3.35103
NM_001012410	SGOL1	A_23_P29723	ref|Homo sapiens shugoshin-like 1 (S. pombe) (SGOL1), transcript variant A2, mRNA [NM_001012410]	0	0	50.3388	4.0339	8.11726e-06	0.00263158	187.917	2.64388	3.33889
NM_001237	CCNA2	A_23_P58321	ref|Homo sapiens cyclin A2 (CCNA2), mRNA [NM_001237]	1.39153e-06	0.000952381	99.3879	3.29594	0	0	53.0769	3.31927	3.30761
NM_005780	LHFP	A_23_P88069	ref|Homo sapiens lipoma HMGIC fusion partner (LHFP), mRNA [NM_005780]	6.95765e-07	0.000576923	76.3558	3.5289	1.39153e-06	0.000952381	89.3283	3.04809	3.28849
NM_020675	SPC25	A_23_P51085	ref|Homo sapiens SPC25, NDC80 kinetochore complex component, homolog (S. cerevisiae) (SPC25), mRNA [NM_020675]	1.99453e-05	0.00419512	263.119	2.71898	0	0	27.2164	3.78137	3.25018
NM_004744	LRAT	A_32_P113066	ref|Homo sapiens lecithin retinol acyltransferase (phosphatidylcholine--retinol O-acyltransferase) (LRAT), mRNA [NM_004744]	9.27687e-07	0.000701754	86.0712	3.43418	1.85537e-06	0.00109589	100.376	3.03491	3.23454
NM_013227	ACAN	A_23_P307310	ref|Homo sapiens aggrecan (ACAN), transcript variant 2, mRNA [NM_013227]	0.00012547	0.0133911	475.874	2.42401	0	0	21.7717	4.02615	3.22508
NM_031966	CCNB1	A_23_P122197	ref|Homo sapiens cyclin B1 (CCNB1), mRNA [NM_031966]	2.0873e-06	0.00107143	133.676	3.0964	0	0	58.8376	3.28016	3.18828
NM_181597	UPP1	A_23_P351275	ref|Homo sapiens uridine phosphorylase 1 (UPP1), transcript variant 2, mRNA [NM_181597]	1.55388e-05	0.00354497	245.633	2.73774	0	0	27.8843	3.60367	3.17071
NM_001083961	WDR62	A_33_P3254606	ref|Homo sapiens WD repeat domain 62 (WDR62), transcript variant 1, mRNA [NM_001083961]	1.87857e-05	0.00407035	258.134	2.70537	0	0	30.8049	3.62251	3.16394
NM_002192	INHBA	A_23_P122924	ref|Homo sapiens inhibin, beta A (INHBA), mRNA [NM_002192]	0	0	51.0519	4.00731	6.28508e-05	0.0087987	378.433	2.30131	3.15431
NR_002324	SNORA62	A_33_P3334448	ref|Homo sapiens small nucleolar RNA, H/ACA box 62 (SNORA62), small nucleolar RNA [NR_002324]	0	0	46.5393	4.15756	0.000277146	0.0216878	642.145	2.07617	3.11687
NM_032270	LRRC8C	A_23_P103775	ref|Homo sapiens leucine rich repeat containing 8 family, member C (LRRC8C), mRNA [NM_032270]	0	0	49.2529	4.14085	0.000233545	0.0195914	605.236	2.08535	3.1131
NM_021067	GINS1	A_33_P3340025	ref|Homo sapiens GINS complex subunit 1 (Psf1 homolog) (GINS1), mRNA [NM_021067]	1.39153e-06	0.000952381	106.135	3.23476	2.31922e-07	0.000238095	80.3617	2.97037	3.10257
NM_024508	ZBED2	A_23_P113793	ref|Homo sapiens zinc finger, BED-type containing 2 (ZBED2), mRNA [NM_024508]	6.00677e-05	0.00866221	370.663	2.53912	0	0	37.0319	3.5785	3.05881
NM_012484	HMMR	A_23_P70007	ref|Homo sapiens hyaluronan-mediated motility receptor (RHAMM) (HMMR), transcript variant 2, mRNA [NM_012484]	1.62345e-06	0.000958904	120.148	3.14283	1.62345e-06	0.00102941	93.2902	2.96465	3.05374
NM_153448	ESX1	A_23_P325606	ref|Homo sapiens ESX homeobox 1 (ESX1), mRNA [NM_153448]	5.56612e-06	0.00190476	171.821	2.96042	2.31922e-07	0.000238095	80.7349	3.13334	3.04688
NM_138555	KIF23	A_33_P3311755	ref|Homo sapiens kinesin family member 23 (KIF23), transcript variant 1, mRNA [NM_138555]	4.63843e-06	0.00173913	160.451	2.96928	2.31922e-07	0.000238095	72.4246	3.06748	3.01838
NM_006088	TUBB2C	A_23_P312863	ref|Homo sapiens tubulin, beta 2C (TUBB2C), mRNA [NM_006088]	4.63843e-06	0.00173913	161.165	2.97046	2.31922e-07	0.000238095	72.8465	3.01854	2.9945
NM_002417	MKI67	A_24_P346855	ref|Homo sapiens antigen identified by monoclonal antibody Ki-67 (MKI67), transcript variant 1, mRNA [NM_002417]	6.95765e-07	0.000576923	82.6941	3.44906	1.73941e-05	0.00414365	236.65	2.50868	2.97887
NM_005733	KIF20A	A_23_P256956	ref|Homo sapiens kinesin family member 20A (KIF20A), mRNA [NM_005733]	4.40651e-06	0.00169643	156.768	2.97575	1.85537e-06	0.00109589	111.287	2.87087	2.92331
NM_016095	GINS2	A_23_P118246	ref|Homo sapiens GINS complex subunit 2 (Psf2 homolog) (GINS2), mRNA [NM_016095]	1.36834e-05	0.00320652	239.8	2.75757	2.31922e-07	0.000238095	78.211	3.02996	2.89376
NM_003542	HIST1H4C	A_23_P214487	ref|Homo sapiens histone cluster 1, H4c (HIST1H4C), mRNA [NM_003542]	2.31922e-07	0.000238095	67.8186	3.65404	0.00018345	0.0170108	553.201	2.12958	2.89181
NM_014143	CD274	A_23_P338479	ref|Homo sapiens CD274 molecule (CD274), mRNA [NM_014143]	1.62345e-06	0.000958904	110.249	3.25451	2.04091e-05	0.00442211	251.773	2.50942	2.88197
NM_152524	SGOL2	A_23_P411335	ref|Homo sapiens shugoshin-like 2 (S. pombe) (SGOL2), transcript variant 1, mRNA [NM_152524]	4.17459e-06	0.00163636	155.797	2.98513	3.47883e-06	0.00151515	137.653	2.74036	2.86274
NM_020390	EIF5A2	A_24_P380022	ref|Homo sapiens eukaryotic translation initiation factor 5A2 (EIF5A2), mRNA [NM_020390]	9.27687e-07	0.000701754	86.045	3.42953	7.07361e-05	0.00929878	394.646	2.27106	2.8503
NM_002837	PTPRB	A_23_P53390	ref|Homo sapiens protein tyrosine phosphatase, receptor type, B (PTPRB), transcript variant 2, mRNA [NM_002837]	1.62345e-06	0.000958904	113.672	3.21862	2.04091e-05	0.00442211	252.098	2.47507	2.84685
NM_032336	GINS4	A_33_P3340040	ref|Homo sapiens GINS complex subunit 4 (Sld5 homolog) (GINS4), mRNA [NM_032336]	5.56612e-06	0.00190476	172.58	2.92337	3.47883e-06	0.00151515	134.986	2.75874	2.84105
NM_018410	HJURP	A_33_P3807062	ref|Homo sapiens Holliday junction recognition protein (HJURP), mRNA [NM_018410]	7.18957e-06	0.00210884	188.839	2.88233	2.31922e-06	0.00119048	117.403	2.78438	2.83335
NM_182687	PKMYT1	A_33_P3397443	ref|Homo sapiens protein kinase, membrane associated tyrosine/threonine 1 (PKMYT1), transcript variant 2, mRNA [NM_182687]	5.56612e-06	0.00190476	170.001	2.93504	3.94267e-06	0.00161905	140.985	2.71183	2.82344
NM_031299	CDCA3	A_24_P218979	ref|Homo sapiens cell division cycle associated 3 (CDCA3), mRNA [NM_031299]	3.71075e-06	0.00152381	151.743	2.99498	6.72573e-06	0.00230159	171.536	2.64938	2.82218
NM_145018	C11ORF82	A_23_P429491	ref|Homo sapiens chromosome 11 open reading frame 82 (C11orf82), mRNA [NM_145018]	6.49381e-06	0.00205882	183.479	2.89287	3.71075e-06	0.00156863	140.23	2.75067	2.82177
NM_018685	ANLN	A_23_P356684	ref|Homo sapiens anillin, actin binding protein (ANLN), mRNA [NM_018685]	6.49381e-06	0.00205882	181.745	2.90183	3.47883e-06	0.00151515	137.191	2.73976	2.8208
NM_032714	INF2	A_23_P218131	ref|Homo sapiens inverted formin, FH2 and WH2 domain containing (INF2), transcript variant 3, mRNA [NM_032714]	2.78306e-06	0.0012766	141.285	3.05307	9.27687e-06	0.00283688	196.197	2.5825	2.81779
NM_001039535	SKA1	A_24_P322354	ref|Homo sapiens spindle and kinetochore associated complex subunit 1 (SKA1), transcript variant 1, mRNA [NM_001039535]	1.11322e-05	0.00277457	220.637	2.79952	2.31922e-06	0.00119048	122.264	2.80356	2.80154
NM_001236	CBR3	A_23_P40453	ref|Homo sapiens carbonyl reductase 3 (CBR3), mRNA [NM_001236]	8.81303e-06	0.00251656	201.988	2.85151	3.71075e-06	0.00156863	138.307	2.74955	2.80053
NM_000958	PTGER4	A_23_P148047	ref|Homo sapiens prostaglandin E receptor 4 (subtype EP4) (PTGER4), mRNA [NM_000958]	3.68755e-05	0.00646341	318.02	2.60763	1.85537e-06	0.00109589	103.18	2.97407	2.79085
NM_173568	UMODL1	A_23_P315964	ref|Homo sapiens uromodulin-like 1 (UMODL1), transcript variant 2, mRNA [NM_173568]	9.74071e-06	0.00267516	209.204	2.81329	5.56612e-06	0.0020339	158.899	2.75089	2.78209
NM_001129895	HGC6.3	A_33_P3328883	ref|Homo sapiens similar to HGC6.3 (HGC6.3), mRNA [NM_001129895]	0.000877592	0.0448873	980.258	2.05914	3.31648e-05	0.0056746	303.137	3.49846	2.7788
NM_001001522	TAGLN	A_23_P87013	ref|Homo sapiens transgelin (TAGLN), transcript variant 1, mRNA [NM_001001522]	1.85537e-06	0.000987654	129.781	3.15949	3.31648e-05	0.0056746	303.636	2.39807	2.77878
NM_080927	DCBLD2	A_23_P91829	ref|Homo sapiens discoidin, CUB and LCCL domain containing 2 (DCBLD2), mRNA [NM_080927]	1.4843e-05	0.00344086	242.486	2.74376	3.01498e-06	0.00144444	127.334	2.81218	2.77797
NM_015444	TMEM158	A_23_P369899	ref|Homo sapiens transmembrane protein 158 (TMEM158), mRNA [NM_015444]	9.04495e-06	0.00256579	203.027	2.82289	4.40651e-06	0.00165217	157.21	2.72222	2.77255
NM_003523	HIST1H2BE	A_33_P3302632	ref|Homo sapiens histone cluster 1, H2be (HIST1H2BE), mRNA [NM_003523]	9.74071e-06	0.00267516	210.106	2.81818	3.94267e-06	0.00161905	141.41	2.72563	2.77191
NM_152562	CDCA2	A_23_P385861	ref|Homo sapiens cell division cycle associated 2 (CDCA2), mRNA [NM_152562]	9.74071e-06	0.00267516	207.527	2.82025	3.94267e-06	0.00161905	147.651	2.69585	2.75805
NM_001809	CENPA	A_24_P413884	ref|Homo sapiens centromere protein A (CENPA), transcript variant 1, mRNA [NM_001809]	9.50879e-06	0.00264516	206.33	2.81744	4.40651e-06	0.00165217	151.814	2.69408	2.75576
NM_005982	SIX1	A_23_P76914	ref|Homo sapiens SIX homeobox 1 (SIX1), mRNA [NM_005982]	1.62345e-06	0.000958904	110.528	3.26721	9.16091e-05	0.0109722	435.805	2.22018	2.7437
NM_207310	CCDC74B	A_23_P381102	ref|Homo sapiens coiled-coil domain containing 74B (CCDC74B), mRNA [NM_207310]	0.000111786	0.0125849	457.502	2.43539	1.62345e-06	0.00102941	96.8327	3.04679	2.74109
NM_000745	CHRNA5	A_23_P88691	ref|Homo sapiens cholinergic receptor, nicotinic, alpha 5 (CHRNA5), mRNA [NM_000745]	4.40651e-06	0.00169643	158.464	2.97365	1.99453e-05	0.00443299	248.602	2.47876	2.7262
NM_001040152	PEG10	A_23_P82503	ref|Homo sapiens paternally expressed 10 (PEG10), transcript variant 1, mRNA [NM_001040152]	3.2469e-06	0.00141414	147.567	3.05085	3.31648e-05	0.0056746	303.964	2.39442	2.72263
NM_134269	SMTN	A_23_P211428	ref|Homo sapiens smoothelin (SMTN), transcript variant 2, mRNA [NM_134269]	6.49381e-06	0.00205882	183.316	2.88048	1.34515e-05	0.00345238	221.647	2.5232	2.70184
NM_203394	E2F7	A_32_P210202	ref|Homo sapiens E2F transcription factor 7 (E2F7), mRNA [NM_203394]	1.62345e-06	0.000958904	111.46	3.20432	0.000118744	0.0129949	472.777	2.18469	2.69451
NM_053279	FAM167A	A_23_P334955	ref|Homo sapiens family with sequence similarity 167, member A (FAM167A), mRNA [NM_053279]	0.000148894	0.014965	508.687	2.39661	1.85537e-06	0.00109589	106.016	2.99232	2.69447
NM_032128	SLC10A7	A_23_P300090	ref|Homo sapiens solute carrier family 10 (sodium/bile acid cotransporter family), member 7 (SLC10A7), transcript variant 3, mRNA [NM_032128]	3.94267e-06	0.00158879	155.509	3.06017	6.74892e-05	0.00912226	387.582	2.29675	2.67846
NM_002266	KPNA2	A_23_P125265	ref|Homo sapiens karyopherin alpha 2 (RAG cohort 1, importin alpha 1) (KPNA2), mRNA [NM_002266]	1.06684e-05	0.00270588	217.721	2.78987	1.02046e-05	0.00295302	203.814	2.55974	2.67481
NM_170589	CASC5	A_23_P100127	ref|Homo sapiens cancer susceptibility candidate 5 (CASC5), transcript variant 1, mRNA [NM_170589]	1.02046e-05	0.00261905	214.645	2.79801	1.09003e-05	0.00305195	210.217	2.54885	2.67343
NM_001030059	PPAPDC1A	A_24_P810290	ref|Homo sapiens phosphatidic acid phosphatase type 2 domain containing 1A (PPAPDC1A), mRNA [NM_001030059]	0.00103159	0.0496429	1042.71	2.04798	0	0	61.9702	3.29433	2.67116
NM_004336	BUB1	A_23_P124417	ref|Homo sapiens budding uninhibited by benzimidazoles 1 homolog (yeast) (BUB1), mRNA [NM_004336]	4.19778e-05	0.00677903	333.895	2.59163	3.94267e-06	0.00161905	142.047	2.73291	2.66227
NM_017858	TIPIN	A_23_P99930	ref|Homo sapiens TIMELESS interacting protein (TIPIN), mRNA [NM_017858]	1.87857e-05	0.00407035	258.826	2.70686	9.04495e-06	0.00280576	194.012	2.59448	2.65067
NM_005517	HMGN2	A_32_P41487	ref|Homo sapiens high-mobility group nucleosomal binding domain 2 (HMGN2), mRNA [NM_005517]	1.62345e-06	0.000958904	125.652	3.12723	0.000149821	0.0150583	514.25	2.16171	2.64447
NM_018131	CEP55	A_33_P3291831	ref|Homo sapiens centrosomal protein 55kDa (CEP55), transcript variant 1, mRNA [NM_018131]	3.45563e-05	0.00620833	311.796	2.61916	5.79804e-06	0.00208333	165.457	2.66555	2.64236
NM_152666	PLD5	A_23_P510	ref|Homo sapiens phospholipase D family, member 5 (PLD5), mRNA [NM_152666]	9.74071e-06	0.00267516	208.57	2.83584	2.41199e-05	0.00468469	270.372	2.44663	2.64123
NM_032636	PSRC1	A_23_P46539	ref|Homo sapiens proline/serine-rich coiled-coil 1 (PSRC1), transcript variant 1, mRNA [NM_032636]	9.04495e-06	0.00256579	203.065	2.83133	2.59752e-05	0.00491228	278.023	2.42646	2.6289
XR_017348	LOC646891	A_24_P187086	ref|PREDICTED: Homo sapiens similar to Serologically defined colon cancer antigen 3 (LOC646891), miscRNA [XR_017348]	0.000380584	0.0269901	716.359	2.22696	1.62345e-06	0.00102941	98.2696	3.01934	2.62315
NM_031942	CDCA7	A_23_P251421	ref|Homo sapiens cell division cycle associated 7 (CDCA7), transcript variant 1, mRNA [NM_031942]	2.6671e-05	0.00518018	286.286	2.65804	9.97263e-06	0.00292517	200.857	2.58167	2.61986
NM_006009	TUBA1A	A_23_P139547	ref|Homo sapiens tubulin, alpha 1a (TUBA1A), mRNA [NM_006009]	1.1828e-05	0.00291429	225.064	2.78962	2.20326e-05	0.00448113	260.331	2.44727	2.61845
NM_001040694	INCENP	A_23_P116387	ref|Homo sapiens inner centromere protein antigens 135/155kDa (INCENP), transcript variant 1, mRNA [NM_001040694]	6.26189e-06	0.00203008	178.885	2.97673	7.88534e-05	0.0100295	411.034	2.25816	2.61745
NM_004438	EPHA4	A_23_P108501	ref|Homo sapiens EPH receptor A4 (EPHA4), mRNA [NM_004438]	1.62345e-06	0.000958904	122.237	3.12931	0.000219398	0.0188446	591.706	2.08935	2.60933
NM_198277	SLC37A2	A_33_P3474319	ref|Homo sapiens solute carrier family 37 (glycerol-3-phosphate transporter), member 2 (SLC37A2), transcript variant 1, mRNA [NM_198277]	2.78306e-06	0.0012766	142.706	3.04665	0.000132659	0.0139512	492.742	2.17176	2.6092
NM_001255	CDC20	A_23_P149200	ref|Homo sapiens cell division cycle 20 homolog (S. cerevisiae) (CDC20), mRNA [NM_001255]	1.06684e-05	0.00270588	217.953	2.79049	2.64391e-05	0.00497817	279.377	2.42253	2.60651
NM_006467	POLR3G	A_33_P3396527	ref|Homo sapiens polymerase (RNA) III (DNA directed) polypeptide G (32kD) (POLR3G), mRNA [NM_006467]	2.15687e-05	0.00447115	267.813	2.70046	1.85537e-05	0.0042328	245.295	2.49617	2.59832
NM_017785	CCDC99	A_23_P41948	ref|Homo sapiens coiled-coil domain containing 99 (CCDC99), mRNA [NM_017785]	3.59479e-05	0.00632653	316.216	2.61286	1.34515e-05	0.00345238	220.905	2.54051	2.57669
NM_000170	GLDC	A_23_P123596	ref|Homo sapiens glycine dehydrogenase (decarboxylating) (GLDC), mRNA [NM_000170]	3.15414e-05	0.00576271	301.317	2.63547	2.13368e-05	0.00438095	256.318	2.49694	2.56621
ENST00000375052	ENST00000375052	A_33_P3305472	ens|small nucleolar RNA, C/D box 1C (SNORD1C), non-coding RNA [Source:RefSeq DNA;Acc:NR_004397] [ENST00000375052]	1.55388e-05	0.00354497	245.53	2.74493	3.5484e-05	0.00595331	310.167	2.38548	2.56521
NM_001012271	BIRC5	A_23_P118815	ref|Homo sapiens baculoviral IAP repeat-containing 5 (BIRC5), transcript variant 3, mRNA [NM_001012271]	4.82397e-05	0.00737589	349.781	2.56933	1.04365e-05	0.00296053	204.964	2.55984	2.56458
NM_004289	NFE2L3	A_23_P42718	ref|Homo sapiens nuclear factor (erythroid-derived 2)-like 3 (NFE2L3), mRNA [NM_004289]	4.12821e-05	0.00679389	330.991	2.5919	1.64664e-05	0.00398876	234.335	2.51358	2.55274
NM_173543	DZIP1L	A_23_P384635	ref|Homo sapiens DAZ interacting protein 1-like (DZIP1L), mRNA [NM_173543]	7.18957e-06	0.00210884	187.638	2.88058	0.000109467	0.0123238	460.659	2.21771	2.54914
NM_000602	SERPINE1	A_24_P158089	ref|Homo sapiens serpin peptidase inhibitor, clade E (nexin, plasminogen activator inhibitor type 1), member 1 (SERPINE1), transcript variant 1, mRNA [NM_000602]	4.12821e-05	0.00679389	331.111	2.6079	2.0641e-05	0.00438424	252.803	2.47011	2.539
NM_018492	PBK	A_32_P62997	ref|Homo sapiens PDZ binding kinase (PBK), mRNA [NM_018492]	8.3028e-05	0.0105917	411.47	2.49853	9.27687e-06	0.00283688	196.269	2.57499	2.53676
NM_012291	ESPL1	A_23_P32707	ref|Homo sapiens extra spindle pole bodies homolog 1 (S. cerevisiae) (ESPL1), mRNA [NM_012291]	5.96039e-05	0.0087415	369.058	2.54142	1.22918e-05	0.00329193	216.514	2.5306	2.53601
NM_016343	CENPF	A_23_P401	ref|Homo sapiens centromere protein F, 350/400ka (mitosin) (CENPF), mRNA [NM_016343]	7.86215e-05	0.0102727	402.236	2.50639	1.04365e-05	0.00296053	205.321	2.56558	2.53598
NM_014903	NAV3	A_23_P13740	ref|Homo sapiens neuron navigator 3 (NAV3), mRNA [NM_014903]	6.49381e-06	0.00205882	185.271	2.8914	0.000125933	0.0135411	483.959	2.18047	2.53594
NM_024943	TMEM156	A_23_P92334	ref|Homo sapiens transmembrane protein 156 (TMEM156), mRNA [NM_024943]	1.06684e-05	0.00270588	219.129	2.92116	0.000194582	0.0176632	566.225	2.14514	2.53315
NM_014363	SACS	A_33_P3405500	ref|Homo sapiens spastic ataxia of Charlevoix-Saguenay (sacsin) (SACS), mRNA [NM_014363]	3.06137e-05	0.00571429	297.788	2.62593	2.52795e-05	0.00484444	275.63	2.43926	2.53259
NM_138410	CMTM7	A_23_P256413	ref|Homo sapiens CKLF-like MARVEL transmembrane domain containing 7 (CMTM7), transcript variant 1, mRNA [NM_138410]	1.85537e-06	0.000987654	127.714	3.11062	0.000593256	0.0345676	849.275	1.95162	2.53112
NM_144653	NACC2	A_23_P113825	ref|Homo sapiens NACC family member 2, BEN and BTB (POZ) domain containing (NACC2), mRNA [NM_144653]	2.92221e-05	0.00555066	292.963	2.65309	3.20052e-05	0.00567901	298.817	2.40022	2.52666
NM_001827	CKS2	A_23_P71727	ref|Homo sapiens CDC28 protein kinase regulatory subunit 2 (CKS2), mRNA [NM_001827]	0.00014959	0.015	510.068	2.39895	5.79804e-06	0.00208333	162.919	2.65416	2.52655
NM_001123168	FAM72A	A_33_P3242952	ref|Homo sapiens family with sequence similarity 72, member A (FAM72A), mRNA [NM_001123168]	5.96039e-05	0.0087415	370.242	2.54326	1.85537e-05	0.0042328	244.251	2.4958	2.51953
NM_001789	CDC25A	A_24_P397107	ref|Homo sapiens cell division cycle 25 homolog A (S. pombe) (CDC25A), transcript variant 1, mRNA [NM_001789]	5.00951e-05	0.00760563	353.991	2.56178	1.85537e-05	0.0042328	243.675	2.47183	2.51681
NM_006043	HS3ST2	A_23_P118158	ref|Homo sapiens heparan sulfate (glucosamine) 3-O-sulfotransferase 2 (HS3ST2), mRNA [NM_006043]	4.59205e-05	0.00730627	342.485	2.6673	4.40651e-05	0.00701107	336.315	2.36072	2.51401
NR_003672	SNHG7	A_24_P352116	ref|Homo sapiens small nucleolar RNA host gene 7 (non-protein coding) (SNHG7), transcript variant 1, non-coding RNA [NR_003672]	2.41199e-05	0.00472727	277.201	2.68611	4.56886e-05	0.00716364	340.183	2.33391	2.51001
NM_004237	TRIP13	A_33_P3339212	ref|Homo sapiens thyroid hormone receptor interactor 13 (TRIP13), transcript variant 1, mRNA [NM_004237]	0.000140081	0.0143128	495.366	2.41908	8.11726e-06	0.00263158	186.781	2.5978	2.50844
NM_181847	AMIGO2	A_23_P14083	ref|Homo sapiens adhesion molecule with Ig-like domain 2 (AMIGO2), transcript variant 2, mRNA [NM_181847]	0.000397978	0.0276774	726.61	2.22969	4.40651e-06	0.00165217	154.394	2.7801	2.5049
NM_015472	WWTR1	A_23_P29769	ref|Homo sapiens WW domain containing transcription regulator 1 (WWTR1), mRNA [NM_015472]	1.62345e-05	0.00360825	248.616	2.72907	7.05042e-05	0.00935385	394.072	2.27706	2.50306
NM_015569	DNM3	A_23_P371266	ref|Homo sapiens dynamin 3 (DNM3), transcript variant 1, mRNA [NM_015569]	5.3342e-06	0.00191667	167.044	3.13606	0.00102533	0.048159	1053.04	1.86537	2.50071
NM_032603	LOXL3	A_24_P88763	ref|Homo sapiens lysyl oxidase-like 3 (LOXL3), mRNA [NM_032603]	0.000249316	0.0205939	613.326	2.31476	5.79804e-06	0.00208333	161.604	2.68014	2.49745
NM_199420	POLQ	A_23_P218827	ref|Homo sapiens polymerase (DNA directed), theta (POLQ), mRNA [NM_199420]	1.99453e-05	0.00419512	263.173	2.70491	6.88807e-05	0.00925234	389.25	2.28671	2.49581
NM_006042	HS3ST3A1	A_23_P66525	ref|Homo sapiens heparan sulfate (glucosamine) 3-O-sulfotransferase 3A1 (HS3ST3A1), mRNA [NM_006042]	0.000100886	0.0115691	443.847	2.43405	1.34515e-05	0.00345238	221.127	2.5538	2.49392
NM_013290	PSMC3IP	A_24_P287941	ref|Homo sapiens PSMC3 interacting protein (PSMC3IP), transcript variant 1, mRNA [NM_013290]	8.32599e-05	0.0105588	412.639	2.49985	2.04091e-05	0.00442211	250.943	2.48432	2.49209
NM_001008657	TCOF1	A_24_P243396	ref|Homo sapiens Treacher Collins-Franceschetti syndrome 1 (TCOF1), transcript variant 3, mRNA [NM_001008657]	7.00404e-05	0.00946709	387.183	2.51911	2.29602e-05	0.00462617	263.713	2.4594	2.48925
NM_025049	PIF1	A_23_P416468	ref|Homo sapiens PIF1 5'-to-3' DNA helicase homolog (S. cerevisiae) (PIF1), mRNA [NM_025049]	1.90176e-05	0.0040796	259.755	2.72579	9.34644e-05	0.0110714	437.549	2.25044	2.48812
NM_005555	KRT6B	A_23_P76249	ref|Homo sapiens keratin 6B (KRT6B), mRNA [NM_005555]	5.58931e-05	0.00831035	360.51	2.54944	2.55114e-05	0.00486726	276.476	2.42436	2.4869
NM_000135	FANCA	A_23_P206441	ref|Homo sapiens Fanconi anemia, complementation group A (FANCA), transcript variant 1, mRNA [NM_000135]	2.94541e-05	0.00557018	294.148	2.65448	5.35739e-05	0.00788396	364.252	2.31572	2.4851
NM_182776	MCM7	A_23_P93690	ref|Homo sapiens minichromosome maintenance complex component 7 (MCM7), transcript variant 2, mRNA [NM_182776]	7.79257e-05	0.0102128	401.342	2.51318	2.13368e-05	0.00438095	254.56	2.45541	2.4843
NM_178014	TUBB	A_23_P81912	ref|Homo sapiens tubulin, beta (TUBB), mRNA [NM_178014]	1.62345e-05	0.00360825	247.622	2.73267	0.000105988	0.0120263	455.889	2.21305	2.47286
NM_018101	CDCA8	A_23_P375	ref|Homo sapiens cell division cycle associated 8 (CDCA8), mRNA [NM_018101]	0.000299643	0.0227465	656.781	2.28147	5.79804e-06	0.00208333	164.064	2.65767	2.46957
NM_145061	SKA3	A_33_P3216008	ref|Homo sapiens spindle and kinetochore associated complex subunit 3 (SKA3), transcript variant 1, mRNA [NM_145061]	2.64391e-05	0.00515837	282.885	2.67275	7.3983e-05	0.00966667	401.877	2.26416	2.46846
NM_003546	HIST1H4L	A_23_P70480	ref|Homo sapiens histone cluster 1, H4l (HIST1H4L), mRNA [NM_003546]	8.95218e-05	0.0109972	420.419	2.49018	2.13368e-05	0.00438095	254.615	2.42691	2.45854
NM_002915	RFC3	A_23_P14193	ref|Homo sapiens replication factor C (activator 1) 3, 38kDa (RFC3), transcript variant 1, mRNA [NM_002915]	0.000158634	0.0153363	522.035	2.39585	1.43791e-05	0.00358382	228.754	2.51795	2.4569
NM_003709	KLF7	A_23_P67980	ref|Homo sapiens Kruppel-like factor 7 (ubiquitous) (KLF7), mRNA [NM_003709]	8.34918e-06	0.0024	200.469	2.84517	0.000315645	0.023506	673.737	2.05983	2.4525
NM_001010866	TMEM201	A_33_P3292525	ref|Homo sapiens transmembrane protein 201 (TMEM201), transcript variant 2, mRNA [NM_001010866]	0.000111786	0.0125849	457.497	2.44372	2.34241e-05	0.00469767	266.853	2.45053	2.44712
NM_001067	TOP2A	A_23_P118834	ref|Homo sapiens topoisomerase (DNA) II alpha 170kDa (TOP2A), mRNA [NM_001067]	0.000250244	0.0205524	614.184	2.31763	9.97263e-06	0.00292517	200.675	2.56416	2.44089
NM_014875	KIF14	A_33_P3230548	ref|Homo sapiens kinesin family member 14 (KIF14), mRNA [NM_014875]	0.00014843	0.0149533	507.881	2.40144	1.90176e-05	0.00427083	246.792	2.4794	2.44042
NM_177987	RP11-631M21.2	A_24_P813147	ref|Homo sapiens tubulin, beta 8 (TUBB8), transcript variant 1, mRNA [NM_177987]	5.914e-05	0.00873288	367.003	2.54453	4.61524e-05	0.00715827	341.727	2.33423	2.43938
NM_004217	AURKB	A_23_P130182	ref|Homo sapiens aurora kinase B (AURKB), mRNA [NM_004217]	3.89628e-05	0.00653697	324.869	2.60891	7.07361e-05	0.00929878	394.881	2.26861	2.43876
NM_014619	GRIK4	A_23_P116249	ref|Homo sapiens glutamate receptor, ionotropic, kainate 4 (GRIK4), mRNA [NM_014619]	0.000189712	0.0175914	554.236	2.35826	5.40378e-05	0.00789831	365.258	2.50932	2.43379
NM_033274	ADAM19	A_23_P374082	ref|Homo sapiens ADAM metallopeptidase domain 19 (meltrin beta) (ADAM19), mRNA [NM_033274]	1.11322e-05	0.00277457	220.886	2.81346	0.000339997	0.0246387	692.076	2.04451	2.42898
NM_182643	DLC1	A_24_P940115	ref|Homo sapiens deleted in liver cancer 1 (DLC1), transcript variant 1, mRNA [NM_182643]	1.1828e-05	0.00291429	223.702	2.78191	0.000268102	0.0214074	633.591	2.07363	2.42777
NM_032505	KBTBD8	A_23_P431252	ref|Homo sapiens kelch repeat and BTB (POZ) domain containing 8 (KBTBD8), mRNA [NM_032505]	6.49381e-06	0.00205882	181.847	2.91387	0.000691127	0.0378653	899.978	1.92461	2.41924
NM_019055	ROBO4	A_23_P344421	ref|Homo sapiens roundabout homolog 4, magic roundabout (Drosophila) (ROBO4), mRNA [NM_019055]	3.8499e-05	0.0065873	322.62	2.60294	9.06814e-05	0.0109524	434.041	2.23482	2.41888
NM_006101	NDC80	A_23_P50108	ref|Homo sapiens NDC80 homolog, kinetochore complex component (S. cerevisiae) (NDC80), mRNA [NM_006101]	0.000226356	0.0194422	590.04	2.31172	1.34515e-05	0.00345238	220.676	2.51956	2.41564
NM_013282	UHRF1	A_23_P208880	ref|Homo sapiens ubiquitin-like with PHD and ring finger domains 1 (UHRF1), transcript variant 2, mRNA [NM_013282]	0.000201076	0.0180625	565.465	2.34464	1.85537e-05	0.0042328	246.318	2.48313	2.41389
NM_182751	MCM10	A_33_P3867534	ref|Homo sapiens minichromosome maintenance complex component 10 (MCM10), transcript variant 1, mRNA [NM_182751]	6.42423e-05	0.0089644	378.393	2.53375	6.54019e-05	0.00903846	382.369	2.28424	2.409
NM_006733	CENPI	A_24_P419132	ref|Homo sapiens centromere protein I (CENPI), mRNA [NM_006733]	8.14045e-05	0.0104776	407.994	2.50481	5.14866e-05	0.00770833	357.096	2.31209	2.40845
NM_181712	KANK4	A_32_P51237	ref|Homo sapiens KN motif and ankyrin repeat domains 4 (KANK4), mRNA [NM_181712]	3.29329e-05	0.00599156	305.194	2.62883	0.000142864	0.0145972	506.197	2.17228	2.40055
NM_012112	TPX2	A_23_P68610	ref|Homo sapiens TPX2, microtubule-associated, homolog (Xenopus laevis) (TPX2), mRNA [NM_012112]	0.000190176	0.0175589	554.438	2.36881	3.06137e-05	0.00556962	290.231	2.4193	2.39405
NM_144973	DENND5B	A_23_P379746	ref|Homo sapiens DENN/MADD domain containing 5B (DENND5B), mRNA [NM_144973]	8.3028e-05	0.0105917	411.482	2.4422	4.7312e-05	0.00720848	348.447	2.34096	2.39158
NM_138779	TEX30	A_23_P362046	ref|Homo sapiens chromosome 13 open reading frame 27 (C13orf27), mRNA [NM_138779]	7.53746e-05	0.00996933	397.047	2.50947	6.98084e-05	0.00934783	390.906	2.27128	2.39037
NM_018136	ASPM	A_33_P3288159	ref|Homo sapiens asp (abnormal spindle) homolog, microcephaly associated (Drosophila) (ASPM), mRNA [NM_018136]	0.000183218	0.0171739	547.212	2.35428	2.73668e-05	0.00506438	283.119	2.42409	2.38919
NM_002466	MYBL2	A_23_P143190	ref|Homo sapiens v-myb myeloblastosis viral oncogene homolog (avian)-like 2 (MYBL2), mRNA [NM_002466]	8.85941e-05	0.0110405	417.513	2.49197	6.49381e-05	0.00903226	381.501	2.28536	2.38866
NM_001813	CENPE	A_23_P253524	ref|Homo sapiens centromere protein E, 312kDa (CENPE), mRNA [NM_001813]	9.81029e-05	0.0114634	436.761	2.47008	5.47335e-05	0.00791946	366.292	2.30542	2.38775
NM_000057	BLM	A_23_P88630	ref|Homo sapiens Bloom syndrome, RecQ helicase-like (BLM), mRNA [NM_000057]	0.000154228	0.0151481	516.239	2.3888	3.64117e-05	0.00603846	315.571	2.38108	2.38494
NM_014750	DLGAP5	A_23_P88331	ref|Homo sapiens discs, large (Drosophila) homolog-associated protein 5 (DLGAP5), transcript variant 1, mRNA [NM_014750]	0.000151677	0.0151389	513.237	2.39437	4.05863e-05	0.00657895	326.163	2.35805	2.37621
NM_000873	ICAM2	A_23_P152655	ref|Homo sapiens intercellular adhesion molecule 2 (ICAM2), transcript variant 5, mRNA [NM_000873]	0.000373858	0.0266446	712.687	2.23554	1.71622e-05	0.00411111	235.11	2.51507	2.37531
NM_030920	ANP32E	A_33_P3407299	ref|Homo sapiens acidic (leucine-rich) nuclear phosphoprotein 32 family, member E (ANP32E), transcript variant 1, mRNA [NM_030920]	9.94944e-05	0.01144	441.652	2.42616	5.07909e-05	0.00768421	354.721	2.32364	2.3749
NM_016426	GTSE1	A_23_P57588	ref|Homo sapiens G-2 and S-phase expressed 1 (GTSE1), mRNA [NM_016426]	0.000109003	0.0124011	454.21	2.44526	5.54293e-05	0.00799331	368.679	2.30422	2.37474
NM_017669	ERCC6L	A_23_P96325	ref|Homo sapiens excision repair cross-complementing rodent repair deficiency, complementation group 6-like (ERCC6L), mRNA [NM_017669]	9.92625e-05	0.0115054	440.916	2.46138	6.65615e-05	0.00905363	386.381	2.28688	2.37413
NM_001012507	CENPW	A_24_P462899	ref|Homo sapiens chromosome 6 open reading frame 173 (C6orf173), mRNA [NM_001012507]	9.78709e-05	0.0114986	435.199	2.47784	7.76938e-05	0.00997024	409.723	2.25978	2.36881
NM_005573	LMNB1	A_23_P258493	ref|Homo sapiens lamin B1 (LMNB1), mRNA [NM_005573]	3.13094e-05	0.00574468	300.647	2.70738	0.000382903	0.026416	721.726	2.02984	2.36861
NM_001098802	CEP78	A_33_P3219641	ref|Homo sapiens centrosomal protein 78kDa (CEP78), transcript variant 1, mRNA [NM_001098802]	4.19778e-05	0.00677903	334.541	2.58674	0.000162809	0.0158465	529.563	2.1504	2.36857
NM_002388	MCM3	A_23_P7873	ref|Homo sapiens minichromosome maintenance complex component 3 (MCM3), mRNA [NM_002388]	0.000168375	0.0160976	533.037	2.38011	4.12821e-05	0.0066171	328.52	2.35429	2.3672
NM_005342	HMGB3	A_33_P3237359	ref|Homo sapiens high-mobility group box 3 (HMGB3), mRNA [NM_005342]	0.000707361	0.0397653	898.147	2.12211	7.88534e-06	0.00259542	182.779	2.60706	2.36458
NM_030941	LOC81691	A_23_P49459	ref|Homo sapiens exonuclease NEF-sp (LOC81691), transcript variant 1, mRNA [NM_030941]	0.000227515	0.019503	591.367	2.3244	1.11322e-05	0.00305732	210.472	2.39771	2.36105
NM_002692	POLE2	A_23_P163099	ref|Homo sapiens polymerase (DNA directed), epsilon 2 (p59 subunit) (POLE2), mRNA [NM_002692]	3.40925e-05	0.00615063	308.11	2.62004	0.000231922	0.0195695	603.313	2.10027	2.36015
NM_138639	BCL2L12	A_33_P3217123	ref|Homo sapiens BCL2-like 12 (proline rich) (BCL2L12), transcript variant 1, mRNA [NM_138639]	0.000597198	0.0353709	843.633	2.15153	9.97263e-06	0.00292517	200	2.56784	2.35968
NM_138554	TLR4	A_32_P66881	ref|Homo sapiens toll-like receptor 4 (TLR4), transcript variant 1, mRNA [NM_138554]	8.90579e-05	0.0109714	419.69	2.4791	9.34644e-05	0.0110714	437.642	2.23945	2.35927
NM_017975	ZWILCH	A_33_P3433873	ref|Homo sapiens Zwilch, kinetochore associated, homolog (Drosophila) (ZWILCH), transcript variant 1, mRNA [NM_017975]	0.00024259	0.0201541	607.087	2.32049	3.22371e-05	0.00569672	299.539	2.39275	2.35662
NM_001114120	DEPDC1	A_33_P3387524	ref|Homo sapiens DEP domain containing 1 (DEPDC1), transcript variant 1, mRNA [NM_001114120]	3.75713e-05	0.00650602	319.665	2.61584	0.000262303	0.0211402	628.824	2.0884	2.35212
NM_001099287	NIPAL4	A_33_P3415052	ref|Homo sapiens NIPA-like domain containing 4 (NIPAL4), mRNA [NM_001099287]	1.62345e-05	0.00360825	247.041	2.72697	0.000522288	0.031898	808.842	1.97197	2.34947
NM_002263	KIFC1	A_23_P133956	ref|Homo sapiens kinesin family member C1 (KIFC1), mRNA [NM_002263]	4.75439e-05	0.0073741	346.461	2.5752	0.000201772	0.0180498	572.585	2.12168	2.34844
NM_006176	NRGN	A_23_P116264	ref|Homo sapiens neurogranin (protein kinase C substrate, RC3) (NRGN), transcript variant 1, mRNA [NM_006176]	4.33694e-05	0.00695167	337.414	2.58748	0.000211049	0.0184584	583.706	2.1006	2.34404
NM_001006121	RBMY1B	A_23_P171397	ref|Homo sapiens RNA binding motif protein, Y-linked, family 1, member B (RBMY1B), mRNA [NM_001006121]	0.000239343	0.0200388	603.779	2.31749	4.40651e-05	0.00701107	336	2.37055	2.34402
AK124996	AK124996	A_33_P3412375	gb|Homo sapiens cDNA FLJ43006 fis, clone BRTHA2013707. [AK124996]	1.62345e-05	0.00360825	247.768	2.7436	0.000701331	0.0382301	905.444	1.9207	2.33215
NM_005451	PDLIM7	A_33_P3217213	ref|Homo sapiens PDZ and LIM domain 7 (enigma) (PDLIM7), transcript variant 1, mRNA [NM_005451]	0.000116657	0.0129306	462.636	2.43493	9.06814e-05	0.0109524	434.47	2.22867	2.3318
NM_001003715	RECQL5	A_33_P3268974	ref|Homo sapiens RecQ protein-like 5 (RECQL5), transcript variant 2, mRNA [NM_001003715]	0.000146111	0.0147887	503.924	2.41219	8.41876e-05	0.0104913	417.248	2.24937	2.33078
NM_002852	PTX3	A_23_P121064	ref|Homo sapiens pentraxin-related gene, rapidly induced by IL-1 beta (PTX3), mRNA [NM_002852]	0.000857415	0.0440644	971.563	2.08087	1.20599e-05	0.00327044	215.317	2.56739	2.32413
NM_024053	CENPM	A_33_P3387831	ref|Homo sapiens centromere protein M (CENPM), transcript variant 1, mRNA [NM_024053]	0.000268333	0.0211905	629.95	2.29591	3.80352e-05	0.00623574	317.454	2.35073	2.32332
NM_174936	PCSK9	A_32_P142440	ref|Homo sapiens proprotein convertase subtilisin/kexin type 9 (PCSK9), mRNA [NM_174936]	0.000199917	0.0180335	564.137	2.29476	4.68482e-05	0.00718861	345.327	2.35005	2.3224
NM_002895	RBL1	A_23_P28733	ref|Homo sapiens retinoblastoma-like 1 (p107) (RBL1), transcript variant 1, mRNA [NM_002895]	7.18957e-05	0.00959752	390.916	2.51582	0.000202004	0.0180331	572.857	2.12527	2.32055
NM_152259	TICRR	A_23_P345707	ref|Homo sapiens chromosome 15 open reading frame 42 (C15orf42), mRNA [NM_152259]	5.3342e-05	0.00798611	357.658	2.5541	0.000263695	0.0211732	630.342	2.08651	2.3203
NM_181803	UBE2C	A_24_P297539	ref|Homo sapiens ubiquitin-conjugating enzyme E2C (UBE2C), transcript variant 6, mRNA [NM_181803]	0.000341157	0.02489	688.638	2.24938	3.38606e-05	0.00574803	306.206	2.38868	2.31903
NM_024094	DSCC1	A_23_P252740	ref|Homo sapiens defective in sister chromatid cohesion 1 homolog (S. cerevisiae) (DSCC1), mRNA [NM_024094]	0.000190176	0.0175589	554.493	2.34135	6.54019e-05	0.00903846	382.088	2.2915	2.31643
NM_016937	POLA1	A_32_P1701	ref|Homo sapiens polymerase (DNA directed), alpha 1, catalytic subunit (POLA1), mRNA [NM_016937]	0.000249316	0.0205939	613.383	2.30723	5.68208e-05	0.00811258	370.041	2.29677	2.302
NM_001130823	DNMT1	A_33_P3329187	ref|Homo sapiens DNA (cytosine-5-)-methyltransferase 1 (DNMT1), transcript variant 1, mRNA [NM_001130823]	0.000434621	0.0292356	751.135	2.21333	3.36286e-05	0.00573123	305.226	2.38529	2.29931
NM_057749	CCNE2	A_33_P3217819	ref|Homo sapiens cyclin E2 (CCNE2), mRNA [NM_057749]	0.000153764	0.015137	515.795	2.39556	0.000113874	0.0125897	467.996	2.19903	2.2973
NM_002875	RAD51	A_23_P88731	ref|Homo sapiens RAD51 homolog (RecA homolog, E. coli) (S. cerevisiae) (RAD51), transcript variant 1, mRNA [NM_002875]	0.000252099	0.0204323	618.032	2.3003	6.2155e-05	0.00875817	377.32	2.29188	2.29609
NM_138419	FAM54A	A_23_P253752	ref|Homo sapiens family with sequence similarity 54, member A (FAM54A), transcript variant 2, mRNA [NM_138419]	0.0002136	0.0187195	579.065	2.32576	7.72299e-05	0.00997006	406.994	2.263	2.29438
NM_016195	KIF20B	A_23_P75071	ref|Homo sapiens kinesin family member 20B (KIF20B), mRNA [NM_016195]	0.000491442	0.0314392	786.65	2.18548	3.31648e-05	0.0056746	304.648	2.38549	2.28548
NM_032892	FRMD5	A_23_P26037	ref|Homo sapiens FERM domain containing 5 (FRMD5), transcript variant 2, mRNA [NM_032892]	8.97537e-05	0.0109322	421.784	2.47533	0.000209889	0.0185072	582.604	2.09023	2.28278
ENST00000380834	CENPO	A_24_P276888	ens|Centromere protein O (CENP-O)(Interphase centromere complex protein 36) [Source:UniProtKB/Swiss-Prot;Acc:Q9BU64] [ENST00000380834]	0.000160026	0.0154362	524.238	2.38378	0.000127093	0.013598	486.097	2.18008	2.28193
NM_003873	NRP1	A_24_P928052	ref|Homo sapiens neuropilin 1 (NRP1), transcript variant 1, mRNA [NM_003873]	2.89902e-05	0.00553097	292.286	2.64108	0.000733568	0.0393898	921.455	1.92094	2.28101
NM_005012	ROR1	A_23_P12363	ref|Homo sapiens receptor tyrosine kinase-like orphan receptor 1 (ROR1), transcript variant 1, mRNA [NM_005012]	4.52247e-05	0.00722222	342.006	2.55621	0.000461524	0.0298799	769.612	2.00483	2.28052
NM_006000	TUBA4A	A_23_P154065	ref|Homo sapiens tubulin, alpha 4a (TUBA4A), mRNA [NM_006000]	0.000210585	0.0187216	577.086	2.33329	9.53198e-05	0.0112295	439.965	2.22683	2.28006
NM_031372	HNRPDL	A_23_P213153	ref|Homo sapiens heterogeneous nuclear ribonucleoprotein D-like (HNRPDL), transcript variant 2, mRNA [NM_031372]	0.000122687	0.0132915	471.034	2.41915	0.00018345	0.0170108	552.992	2.13301	2.27608
NM_014321	ORC6L	A_23_P100344	ref|Homo sapiens origin recognition complex, subunit 6 like (yeast) (ORC6L), mRNA [NM_014321]	0.000182059	0.0171024	546.299	2.36538	0.000135674	0.0142336	495.848	2.17675	2.27107
NM_017955	CDCA4	A_24_P133488	ref|Homo sapiens cell division cycle associated 4 (CDCA4), transcript variant 1, mRNA [NM_017955]	0.000202468	0.0181497	568.369	2.33519	0.000109699	0.0122857	461.276	2.20609	2.27064
NR_001587	AURKAPS1	A_33_P3230017	ref|Homo sapiens aurora kinase A pseudogene 1 (AURKAPS1), non-coding RNA [NR_001587]	0.000257433	0.0206704	621.385	2.29978	9.78709e-05	0.0114986	443.867	2.23264	2.26621
NR_026854	LOC401127	A_23_P41267	ref|Homo sapiens WD repeat domain 5 pseudogene (LOC401127), non-coding RNA [NR_026854]	0.000624565	0.0366894	857.596	2.14572	3.45563e-05	0.00584314	308.07	2.38547	2.2656
NM_005328	HAS2	A_23_P10206	ref|Homo sapiens hyaluronan synthase 2 (HAS2), mRNA [NM_005328]	5.3342e-05	0.00798611	357.662	2.56214	0.000546408	0.0328134	825.131	1.96545	2.26379
XM_001716150	LOC375295	A_23_P302787	ref|PREDICTED: Homo sapiens hypothetical protein LOC375295 (LOC375295), mRNA [XM_001716150]	0.000466858	0.0303163	773.621	2.19005	4.56886e-05	0.00716364	340.9	2.33489	2.26247
NM_024857	ATAD5	A_24_P113144	ref|Homo sapiens ATPase family, AAA domain containing 5 (ATAD5), mRNA [NM_024857]	3.08456e-05	0.00570815	300.016	2.63689	0.000939051	0.0455968	1016.45	1.88629	2.26159
NM_203286	PVRL1	A_23_P76034	ref|Homo sapiens poliovirus receptor-related 1 (herpesvirus entry mediator C) (PVRL1), transcript variant 3, mRNA [NM_203286]	0.000126397	0.0134568	476.462	2.43383	0.000265086	0.0212454	631.519	2.0858	2.25982
ENST00000358041	ENST00000358041	A_33_P3288219	ens|Putative uncharacterized protein FLJ45684 [Source:UniProtKB/Swiss-Prot;Acc:Q6ZSA8] [ENST00000358041]	0.000257201	0.0206903	621.153	2.28978	8.72026e-05	0.0107123	425.421	2.22941	2.25959
NM_005192	CDKN3	A_23_P48669	ref|Homo sapiens cyclin-dependent kinase inhibitor 3 (CDKN3), transcript variant 1, mRNA [NM_005192]	0.000360638	0.0259599	703.377	2.22792	6.42423e-05	0.0089644	379.971	2.29044	2.25918
NM_001110503	TMEM87A	A_24_P65098	ref|Homo sapiens transmembrane protein 87A (TMEM87A), transcript variant 2, mRNA [NM_001110503]	5.19505e-05	0.00785965	355.602	2.57084	0.00059859	0.0346443	852.373	1.94597	2.25841
ENST00000410047	KLHL7	A_23_P215517	ens|Kelch-like protein 7 [Source:UniProtKB/Swiss-Prot;Acc:Q8IXQ5] [ENST00000410047]	0.000244445	0.0202692	608.855	2.28506	0.000108076	0.012199	459.179	2.22194	2.2535
NM_019042	PUS7	A_23_P82478	ref|Homo sapiens pseudouridylate synthase 7 homolog (S. cerevisiae) (PUS7), mRNA [NM_019042]	0.000239807	0.02	604.768	2.30583	0.000123846	0.0134509	480.053	2.20037	2.2531
NM_003537	HIST1H3B	A_23_P93258	ref|Homo sapiens histone cluster 1, H3b (HIST1H3B), mRNA [NM_003537]	0.000502806	0.0320236	792.821	2.18938	3.57159e-05	0.00596899	311.595	2.31609	2.25274
NM_004233	CD83	A_23_P70670	ref|Homo sapiens CD83 molecule (CD83), transcript variant 1, mRNA [NM_004233]	3.5484e-05	0.0062963	314.922	2.61165	0.000895218	0.0445213	996.43	1.8906	2.25113
NM_197941	ADAMTS6	A_23_P213319	ref|Homo sapiens ADAM metallopeptidase with thrombospondin type 1 motif, 6 (ADAMTS6), mRNA [NM_197941]	0.000211049	0.0186475	577.472	2.30015	0.000105524	0.012037	454.938	2.20051	2.25033
NM_021013	KRT34	A_23_P101054	ref|Homo sapiens keratin 34 (KRT34), mRNA [NM_021013]	0.000758384	0.0410804	923.368	2.08123	2.73668e-05	0.00506438	283.321	2.41478	2.248
NM_004219	PTTG1	A_23_P7636	ref|Homo sapiens pituitary tumor-transforming 1 (PTTG1), mRNA [NM_004219]	0.000138457	0.0142143	492.58	2.40274	0.000240735	0.0200386	610.391	2.09084	2.24679
NM_006461	SPAG5	A_23_P89509	ref|Homo sapiens sperm associated antigen 5 (SPAG5), mRNA [NM_006461]	0.000350666	0.0254118	695.15	2.25052	8.78983e-05	0.0107062	428.786	2.2379	2.24421
NM_001071	TYMS	A_23_P50096	ref|Homo sapiens thymidylate synthetase (TYMS), mRNA [NM_001071]	0.000336982	0.0246689	686.633	2.24676	8.48833e-05	0.0105172	421.178	2.23989	2.24332
ENST00000397495	PPM1F	A_24_P213763	ens|Protein phosphatase 1F (EC 3.1.3.16)(Ca(2+)/calmodulin-dependent protein kinase phosphatase)(CaM-kinase phosphatase)(CaMKPase)(Partner of PIX 2)(hFEM-2) [Source:UniProtKB/Swiss-Prot;Acc:P49593] [ENST00000397495]	0.000345099	0.0250927	691.12	2.25385	0.000100422	0.0116712	447.611	2.22332	2.23858
NM_001814	CTSC	A_23_P1552	ref|Homo sapiens cathepsin C (CTSC), transcript variant 1, mRNA [NM_001814]	8.0013e-05	0.0103916	403.791	2.49739	0.000537595	0.0325105	819.157	1.97742	2.23741
NM_024745	SHCBP1	A_32_P96719	ref|Homo sapiens SHC SH2-domain binding protein 1 (SHCBP1), mRNA [NM_024745]	0.0003669	0.0263228	708.903	2.24291	9.30006e-05	0.0110773	437.311	2.22819	2.23555
NM_002592	PCNA	A_23_P28886	ref|Homo sapiens proliferating cell nuclear antigen (PCNA), transcript variant 1, mRNA [NM_002592]	0.000481006	0.0310479	781.286	2.19021	6.63296e-05	0.00907937	385.551	2.28077	2.23549
NM_001032283	TMPO	A_33_P3412613	ref|Homo sapiens thymopoietin (TMPO), transcript variant 2, mRNA [NM_001032283]	0.000128021	0.0135294	479.827	2.42433	0.000359015	0.0254187	704.197	2.03865	2.23149
NM_022111	CLSPN	A_23_P126212	ref|Homo sapiens claspin homolog (Xenopus laevis) (CLSPN), mRNA [NM_022111]	5.56612e-05	0.0083045	359.302	2.55397	0.000913076	0.0451491	1004.27	1.89971	2.22684
NM_024680	E2F8	A_23_P35871	ref|Homo sapiens E2F transcription factor 8 (E2F8), mRNA [NM_024680]	0.000210585	0.0187216	576.827	2.33225	0.000199685	0.0179375	570.752	2.1199	2.22607
NM_006845	KIF2C	A_23_P34788	ref|Homo sapiens kinesin family member 2C (KIF2C), mRNA [NM_006845]	0.000516026	0.0321532	800.99	2.18515	7.65342e-05	0.00990991	406.514	2.26677	2.22596
NM_001002033	HN1	A_23_P100632	ref|Homo sapiens hematological and neurological expressed 1 (HN1), transcript variant 3, mRNA [NM_001002033]	6.23869e-05	0.00887789	374.776	2.53711	0.000841412	0.0428842	973.61	1.90937	2.22324
NM_198947	FAM111B	A_33_P3270657	ref|Homo sapiens family with sequence similarity 111, member B (FAM111B), transcript variant 1, mRNA [NM_198947]	0.000239575	0.0200194	604.42	2.3158	0.000179275	0.0167679	548.394	2.1282	2.222
NM_003981	PRC1	A_23_P206059	ref|Homo sapiens protein regulator of cytokinesis 1 (PRC1), transcript variant 1, mRNA [NM_003981]	0.000506981	0.0319591	795.047	2.17914	7.76938e-05	0.00997024	409.886	2.25668	2.21791
NM_003530	HIST1H3D	A_24_P217834	ref|Homo sapiens histone cluster 1, H3d (HIST1H3D), mRNA [NM_003530]	0.000680922	0.0386825	886.978	2.13703	5.07909e-05	0.00768421	354.74	2.29768	2.21735
NM_003539	HIST1H4D	A_23_P395374	ref|Homo sapiens histone cluster 1, H4d (HIST1H4D), mRNA [NM_003539]	0.000442275	0.0293837	756.391	2.20983	9.02175e-05	0.0109577	432.351	2.22089	2.21536
NM_006342	TACC3	A_23_P212844	ref|Homo sapiens transforming, acidic coiled-coil containing protein 3 (TACC3), mRNA [NM_006342]	0.000264159	0.0210148	626.516	2.28729	0.000168375	0.0161693	537.823	2.13928	2.21329
NM_018048	MAGOHB	A_24_P330112	ref|Homo sapiens mago-nashi homolog B (Drosophila) (MAGOHB), mRNA [NM_018048]	9.60156e-05	0.0113736	432.351	2.46226	0.000602533	0.0346863	854.094	1.96025	2.21125
NM_014344	FJX1	A_23_P150693	ref|Homo sapiens four jointed box 1 (Drosophila) (FJX1), mRNA [NM_014344]	0.000910061	0.045681	993.396	2.0657	4.26736e-05	0.00681481	333.19	2.3506	2.20815
NM_031217	KIF18A	A_33_P3242649	ref|Homo sapiens kinesin family member 18A (KIF18A), mRNA [NM_031217]	0.000382207	0.0270608	717.701	2.23534	0.000147734	0.0148832	511.678	2.17677	2.20605
NR_003598	LOC442308	A_24_P647682	ref|Homo sapiens similar to tubulin, beta 5 (LOC442308), non-coding RNA [NR_003598]	0.000124078	0.0133416	473.17	2.44036	0.000577717	0.0339836	840.215	1.96803	2.20419
NM_012447	STAG3	A_23_P145657	ref|Homo sapiens stromal antigen 3 (STAG3), mRNA [NM_012447]	0.000119904	0.0131218	466.062	2.42	0.000494225	0.0309738	790.951	1.98628	2.20314
NM_206886	CCDC18	A_33_P3327165	ref|Homo sapiens coiled-coil domain containing 18 (CCDC18), mRNA [NM_206886]	0.000453639	0.0299083	764.165	2.20755	0.000121295	0.0132405	476.483	2.19607	2.20181
NM_001845	COL4A1	A_23_P65240	ref|Homo sapiens collagen, type IV, alpha 1 (COL4A1), mRNA [NM_001845]	0.000638017	0.0371255	865.499	2.13566	7.90853e-05	0.0100294	411.459	2.26681	2.20124
NM_145040	PRKCDBP	A_23_P203475	ref|Homo sapiens protein kinase C, delta binding protein (PRKCDBP), mRNA [NM_145040]	0.000314718	0.0235182	670.579	2.25928	0.000204091	0.0181818	575.908	2.12342	2.19135
NM_020242	KIF15	A_23_P80902	ref|Homo sapiens kinesin family member 15 (KIF15), mRNA [NM_020242]	0.000488195	0.0312779	785.288	2.19612	0.000125933	0.0135411	484.187	2.18347	2.18979
NM_005391	PDK3	A_23_P250478	ref|Homo sapiens pyruvate dehydrogenase kinase, isozyme 3 (PDK3), transcript variant 2, mRNA [NM_005391]	0.000583283	0.0348821	835.168	2.15334	0.000101814	0.011738	450.555	2.22584	2.18959
NM_012415	RAD54B	A_23_P82738	ref|Homo sapiens RAD54 homolog B (S. cerevisiae) (RAD54B), mRNA [NM_012415]	0.000423025	0.0287697	742.86	2.21612	0.000162113	0.0158145	529.013	2.15552	2.18582
NM_000791	DHFR	A_24_P343095	ref|Homo sapiens dihydrofolate reductase (DHFR), mRNA [NM_000791]	0.000424417	0.0288189	743.891	2.21387	0.000152836	0.0152546	517.569	2.15371	2.18379
NM_018186	C1ORF112	A_23_P11862	ref|Homo sapiens chromosome 1 open reading frame 112 (C1orf112), mRNA [NM_018186]	0.000316573	0.0235345	672.218	2.256	0.000211745	0.0184444	584.306	2.11112	2.18356
NM_138441	MB21D1	A_32_P1173	ref|Homo sapiens chromosome 6 open reading frame 150 (C6orf150), mRNA [NM_138441]	0.000234473	0.0196693	599.139	2.30996	0.00032469	0.0239316	678.635	2.05593	2.18294
NM_024629	MLF1IP	A_23_P254733	ref|Homo sapiens MLF1 interacting protein (MLF1IP), mRNA [NM_024629]	0.000741454	0.0407261	915.183	2.11838	8.67387e-05	0.0106857	424.875	2.24404	2.18121
NM_001001710	FAM166A	A_33_P3295870	ref|Homo sapiens family with sequence similarity 166, member A (FAM166A), mRNA [NM_001001710]	0.000133819	0.0140049	486.258	2.38549	0.000570296	0.0336849	836.312	1.96833	2.17691
NR_026583	RACGAP1P	A_23_P65041	ref|Homo sapiens Rac GTPase activating protein 1 pseudogene (RACGAP1P), non-coding RNA [NR_026583]	0.000137762	0.0142446	491.018	2.3998	0.000612969	0.0350066	859.823	1.95173	2.17577
NM_005496	SMC4	A_33_P3716128	ref|Homo sapiens structural maintenance of chromosomes 4 (SMC4), transcript variant 1, mRNA [NM_005496]	0.000513475	0.0321335	799.058	2.18	0.000153996	0.0152294	519.929	2.16926	2.17463
NM_017593	BMP2K	A_23_P334282	ref|Homo sapiens BMP2 inducible kinase (BMP2K), transcript variant 2, mRNA [NM_017593]	0.000250475	0.0204934	616.351	2.31064	0.000361566	0.0254739	706.782	2.037	2.17382
NM_144643	SCLT1	A_33_P3340404	ref|Homo sapiens sodium channel and clathrin linker 1 (SCLT1), mRNA [NM_144643]	0.000316341	0.0235579	671.976	2.26912	0.000279234	0.0217722	644.269	2.072	2.17056
NM_001017420	ESCO2	A_24_P323598	ref|Homo sapiens establishment of cohesion 1 homolog 2 (S. cerevisiae) (ESCO2), mRNA [NM_001017420]	0.00020038	0.0180376	564.616	2.32216	0.000372698	0.0260454	714.577	2.01501	2.16858
NM_005030	PLK1	A_33_P3298387	ref|Homo sapiens polo-like kinase 1 (Drosophila) (PLK1), mRNA [NM_005030]	0.000222877	0.0192585	586.634	2.34043	0.000478918	0.0304124	781.704	1.99163	2.16603
NM_032871	RELT	A_24_P38951	ref|Homo sapiens RELT tumor necrosis factor receptor (RELT), transcript variant 1, mRNA [NM_032871]	0.000267638	0.0211743	629.142	2.29904	0.000381047	0.0263724	720.099	2.03231	2.16567
NM_006392	NOP56	A_24_P101402	ref|Homo sapiens NOP56 ribonucleoprotein homolog (yeast) (NOP56), transcript variant 1, mRNA [NM_006392]	0.000289206	0.0223477	649.089	2.26824	0.000311471	0.0233565	669.848	2.05962	2.16393
NM_002539	ODC1	A_23_P165840	ref|Homo sapiens ornithine decarboxylase 1 (ODC1), mRNA [NM_002539]	0.000776474	0.0417456	931.784	2.10017	0.000103205	0.0118667	452.108	2.21867	2.15942
XM_002348274	LOC400986	A_33_P3335022	ref|PREDICTED: Homo sapiens protein immuno-reactive with anti-PTH polyclonal antibodies (LOC400986), mRNA [XM_002348274]	0.000228907	0.0194675	593.582	2.31364	0.000423489	0.028179	748.716	2.00161	2.15763
NM_001018115	FANCD2	A_23_P143994	ref|Homo sapiens Fanconi anemia, complementation group D2 (FANCD2), transcript variant 2, mRNA [NM_001018115]	0.00038012	0.0270016	715.802	2.22778	0.000272044	0.0216421	637.44	2.07208	2.14993
NM_006331	EMG1	A_24_P253215	ref|Homo sapiens EMG1 nucleolar protein homolog (S. cerevisiae) (EMG1), mRNA [NM_006331]	0.000716174	0.0400519	901.637	2.12223	0.000136834	0.0143204	497.717	2.17331	2.14777
NM_078469	BCCIP	A_24_P1255	ref|Homo sapiens BRCA2 and CDKN1A interacting protein (BCCIP), transcript variant C, mRNA [NM_078469]	0.000137298	0.0142995	490.339	2.41824	0.00105037	0.0490152	1062.65	1.86524	2.14174
NM_003544	HIST1H4B	A_24_P166407	ref|Homo sapiens histone cluster 1, H4b (HIST1H4B), mRNA [NM_003544]	0.000564034	0.0343503	826.937	2.16834	0.000183218	0.0170259	552.747	2.11455	2.14144
NM_002106	H2AFZ	A_24_P41570	ref|Homo sapiens H2A histone family, member Z (H2AFZ), mRNA [NM_002106]	0.000433462	0.0292031	749.969	2.21647	0.000286887	0.0222482	649.873	2.0586	2.13753
NM_003975	SH2D2A	A_23_P160618	ref|Homo sapiens SH2 domain protein 2A (SH2D2A), transcript variant 2, mRNA [NM_003975]	0.000805232	0.0424969	946.755	2.09309	0.000137762	0.0143133	499.244	2.17956	2.13633
NM_001042550	SMC2	A_33_P3378334	ref|Homo sapiens structural maintenance of chromosomes 2 (SMC2), transcript variant 1, mRNA [NM_001042550]	0.000551742	0.0339372	818.413	2.17081	0.000228443	0.0193517	600.113	2.09377	2.13229
NM_018063	HELLS	A_33_P3258117	ref|Homo sapiens helicase, lymphoid-specific (HELLS), mRNA [NM_018063]	0.000441811	0.0293981	756.193	2.2084	0.000311007	0.0233624	668.949	2.05415	2.13128
NM_000214	JAG1	A_23_P210763	ref|Homo sapiens jagged 1 (Alagille syndrome) (JAG1), mRNA [NM_000214]	0.000766501	0.0413125	927.408	2.10609	0.0001533	0.0151954	519.159	2.15522	2.13066
NM_198468	MMS22L	A_32_P95914	ref|Homo sapiens chromosome 6 open reading frame 167 (C6orf167), mRNA [NM_198468]	0.00023169	0.0195882	596.744	2.32136	0.00069762	0.038076	903.896	1.93962	2.13049
NM_013246	CLCF1	A_23_P138760	ref|Homo sapiens cardiotrophin-like cytokine factor 1 (CLCF1), transcript variant 1, mRNA [NM_013246]	0.000464075	0.030181	772.085	2.20171	0.000311703	0.0232929	670.468	2.05771	2.12971
NM_000226	KRT9	A_23_P15734	ref|Homo sapiens keratin 9 (KRT9), mRNA [NM_000226]	0.00018345	0.0171212	548.402	2.36526	0.000919801	0.0450682	1007.96	1.89283	2.12904
NM_152515	CKAP2L	A_23_P388812	ref|Homo sapiens cytoskeleton associated protein 2-like (CKAP2L), mRNA [NM_152515]	0.000436477	0.0291783	752.793	2.18352	0.000272972	0.0216759	638.139	2.0722	2.12786
NM_003504	CDC45L	A_23_P57379	ref|Homo sapiens CDC45 cell division cycle 45-like (S. cerevisiae) (CDC45L), mRNA [NM_003504]	0.00101211	0.0490889	1033.93	2.05639	0.000113642	0.0126289	466.36	2.1991	2.12775
BC094867	LOC100132774	A_33_P3334384	gb|Homo sapiens cDNA clone IMAGE:5419546. [BC094867]	0.000254418	0.0205816	619.047	2.28321	0.00051417	0.0314915	804.404	1.97224	2.12773
NM_004805	POLR2D	A_23_P209778	ref|Homo sapiens polymerase (RNA) II (DNA directed) polypeptide D (POLR2D), mRNA [NM_004805]	0.000719421	0.0401294	903.507	2.11693	0.000174405	0.0164912	543.416	2.13668	2.1268
NM_002689	POLA2	A_23_P161615	ref|Homo sapiens polymerase (DNA directed), alpha 2 (70kD subunit) (POLA2), mRNA [NM_002689]	0.000542465	0.0334143	813.799	2.17359	0.000288511	0.0222939	651.593	2.07253	2.12306
CR625452	HDAC4	A_33_P3301876	gb|full-length cDNA clone CS0DI075YH20 of Placenta Cot 25-normalized of Homo sapiens (human). [CR625452]	0.000389165	0.0273736	721.176	2.20862	0.000309615	0.0232984	667.534	2.03515	2.12189
NM_170721	MSI2	A_23_P369479	ref|Homo sapiens musashi homolog 2 (Drosophila) (MSI2), transcript variant 2, mRNA [NM_170721]	0.000456422	0.03	766.731	2.20393	0.000353681	0.0252483	701.809	2.03965	2.12179
NM_007080	LSM6	A_23_P259451	ref|Homo sapiens LSM6 homolog, U6 small nuclear RNA associated (S. cerevisiae) (LSM6), mRNA [NM_007080]	0.000675124	0.0384544	883.649	2.12664	0.000212208	0.0184476	584.629	2.11487	2.12075
NM_178836	PLD6	A_23_P360626	ref|Homo sapiens phospholipase D family, member 6 (PLD6), mRNA [NM_178836]	0.000349042	0.0253367	693.621	2.21834	0.000361566	0.0254739	706.192	2.01729	2.11782
NM_007300	BRCA1	A_23_P207400	ref|Homo sapiens breast cancer 1, early onset (BRCA1), transcript variant 2, mRNA [NM_007300]	0.000514866	0.0321273	800.094	2.18026	0.000356928	0.0253542	703.188	2.04248	2.11137
NM_005915	MCM6	A_23_P90612	ref|Homo sapiens minichromosome maintenance complex component 6 (MCM6), mRNA [NM_005915]	0.000744701	0.0407487	916.231	2.10634	0.000221717	0.0189307	594.138	2.11094	2.10864
ENST00000405673	FAM118A	A_33_P3252809	ens|Protein FAM118A [Source:UniProtKB/Swiss-Prot;Acc:Q9NWS6] [ENST00000405673]	0.000234009	0.019707	598.257	2.2855	0.000673037	0.0373008	889.989	1.93016	2.10783
ENST00000374885	MSANTD3	A_33_P3380056	ens|UPF0439 protein C9orf30 [Source:UniProtKB/Swiss-Prot;Acc:Q96H12] [ENST00000374885]	0.000194582	0.0177754	558.228	2.30371	0.000777633	0.0407908	944.507	1.90391	2.10381
ENST00000358739	HIST1H2AI	A_33_P3393135	ens|Histone H2A type 1 (H2A.1)(H2A/p) [Source:UniProtKB/Swiss-Prot;Acc:P0C0S8] [ENST00000358739]	0.00092931	0.0463237	1000.65	2.07624	0.000177884	0.0166739	546.978	2.1247	2.10047
NM_013277	RACGAP1	A_32_P186474	ref|Homo sapiens Rac GTPase activating protein 1 (RACGAP1), transcript variant 1, mRNA [NM_013277]	0.000802681	0.0424663	945.509	2.094	0.000214991	0.01854	587.378	2.10592	2.09996
NM_005480	TROAP	A_23_P150935	ref|Homo sapiens trophinin associated protein (tastin) (TROAP), transcript variant 1, mRNA [NM_005480]	0.000885941	0.0450472	983.825	2.08009	0.000210121	0.0184898	582.786	2.11653	2.09831
NM_003318	TTK	A_23_P259586	ref|Homo sapiens TTK protein kinase (TTK), transcript variant 1, mRNA [NM_003318]	0.00104342	0.0499334	1047.33	2.04953	0.000167679	0.0161384	536.614	2.14238	2.09596
NM_005320	HIST1H1D	A_24_P260639	ref|Homo sapiens histone cluster 1, H1d (HIST1H1D), mRNA [NM_005320]	0.000749803	0.0409241	918.253	2.09161	0.000198293	0.017887	569.729	2.09988	2.09575
NM_003511	HIST1H2AL	A_23_P363174	ref|Homo sapiens histone cluster 1, H2al (HIST1H2AL), mRNA [NM_003511]	0.000536203	0.0332184	810.714	2.17854	0.000379424	0.0263022	718.976	2.01071	2.09463
NM_006479	RAD51AP1	A_23_P99292	ref|Homo sapiens RAD51 associated protein 1 (RAD51AP1), transcript variant 2, mRNA [NM_006479]	0.000505821	0.0319795	794.549	2.1637	0.000410038	0.027625	739.184	2.01714	2.09042
NM_031921	ATAD3B	A_33_P3313258	ref|Homo sapiens ATPase family, AAA domain containing 3B (ATAD3B), mRNA [NM_031921]	0.000418619	0.0286054	740.788	2.19599	0.00053945	0.032486	820.388	1.97913	2.08756
NM_005431	XRCC2	A_33_P3241190	ref|Homo sapiens X-ray repair complementing defective repair in Chinese hamster cells 2 (XRCC2), mRNA [NM_005431]	0.000505589	0.0320117	794.163	2.18285	0.000500719	0.0311544	795.211	1.98827	2.08556
NM_005322	HIST1H1B	A_23_P250385	ref|Homo sapiens histone cluster 1, H1b (HIST1H1B), mRNA [NM_005322]	0.000590936	0.0351448	840.256	2.14899	0.000378728	0.0263387	718.349	2.01849	2.08374
ENST00000396653	AP1S3	A_33_P3288995	ens|AP-1 complex subunit sigma-3 (Adapter-related protein complex 1 sigma-1C subunit)(Adaptor protein complex AP-1 sigma-1C subunit)(Sigma-adaptin 1C)(Sigma1C-adaptin)(Golgi adaptor HA1/AP1 adaptin sigma-1C subunit)(Clathrin assembly protein complex 1 sig	0.000334199	0.0245068	684.503	2.2361	0.000693446	0.0379442	902.011	1.92746	2.08178
ENST00000374306	LRRC37A5P	A_33_P3412013	ens|Putative uncharacterized protein C9orf29 [Source:UniProtKB/Swiss-Prot;Acc:Q49AS3] [ENST00000374306]	0.000452479	0.0298775	763.44	2.21074	0.000552437	0.0328552	828.916	1.95231	2.08152
AK127623	FLJ45721	A_33_P3264974	gb|Homo sapiens cDNA FLJ45721 fis, clone HCASM2007773. [AK127623]	0.000660513	0.0379228	877.059	2.1163	0.000292453	0.0225179	654.701	2.04536	2.08083
NM_005639	SYT1	A_23_P36795	ref|Homo sapiens synaptotagmin I (SYT1), transcript variant 1, mRNA [NM_005639]	0.000314718	0.0235182	670.689	2.21576	0.000607171	0.0348602	856.371	1.93808	2.07692
NM_020799	STAMBPL1	A_23_P385322	ref|Homo sapiens STAM binding protein-like 1 (STAMBPL1), mRNA [NM_020799]	0.00097152	0.0478196	1016.48	2.05557	0.000252563	0.020586	620.763	2.08309	2.06933
NM_001103161	SH2D5	A_24_P686965	ref|Homo sapiens SH2 domain containing 5 (SH2D5), transcript variant 1, mRNA [NM_001103161]	0.00101257	0.0490562	1034.06	2.05325	0.000268102	0.0214074	633.784	2.08435	2.0688
NM_017760	NCAPG2	A_33_P3659876	ref|Homo sapiens non-SMC condensin II complex, subunit G2 (NCAPG2), mRNA [NM_017760]	0.00065889	0.03788	876.75	2.13811	0.000484484	0.0305857	785.404	1.99289	2.0655
NM_001905	CTPS	A_33_P3235217	ref|Homo sapiens CTP synthase (CTPS), mRNA [NM_001905]	0.000881302	0.0450237	981.858	2.07941	0.000323067	0.0238527	678.085	2.04897	2.06419
NM_002105	H2AFX	A_24_P38895	ref|Homo sapiens H2A histone family, member X (H2AFX), mRNA [NM_002105]	0.000983348	0.0482916	1022.01	2.06158	0.000275523	0.0216393	641.527	2.06674	2.06416
NM_003686	EXO1	A_23_P23303	ref|Homo sapiens exonuclease 1 (EXO1), transcript variant 3, mRNA [NM_003686]	0.000562874	0.0343281	825.835	2.14619	0.000508372	0.0315396	799.77	1.98102	2.06361
NM_001993	F3	A_33_P3226832	ref|Homo sapiens coagulation factor III (thromboplastin, tissue factor) (F3), mRNA [NM_001993]	0.000413284	0.0283307	737.469	2.20758	0.000772763	0.0406341	942.918	1.91914	2.06336
NM_016228	AADAT	A_23_P253484	ref|Homo sapiens aminoadipate aminotransferase (AADAT), transcript variant 1, mRNA [NM_016228]	0.000355072	0.025602	699.501	2.24027	0.000931629	0.0453386	1013.27	1.88235	2.06131
NM_001420	ELAVL3	A_23_P319626	ref|Homo sapiens ELAV (embryonic lethal, abnormal vision, Drosophila)-like 3 (Hu antigen C) (ELAVL3), transcript variant 1, mRNA [NM_001420]	0.000400529	0.02781	728.343	2.20399	0.00076395	0.0403676	938.222	1.91072	2.05736
NM_016657	KDELR3	A_23_P211504	ref|Homo sapiens KDEL (Lys-Asp-Glu-Leu) endoplasmic reticulum protein retention receptor 3 (KDELR3), transcript variant 2, mRNA [NM_016657]	0.000460133	0.0299698	770.153	2.20084	0.00081706	0.0423947	963.213	1.91384	2.05734
NM_001039841	ARHGAP11B	A_33_P3339375	ref|Homo sapiens Rho GTPase activating protein 11B (ARHGAP11B), mRNA [NM_001039841]	0.000621782	0.0365757	856.199	2.15263	0.000606939	0.0348933	856.31	1.95821	2.05542
NM_175886	PRPS1L1	A_32_P192823	ref|Homo sapiens phosphoribosyl pyrophosphate synthetase 1-like 1 (PRPS1L1), mRNA [NM_175886]	0.000885709	0.0450885	983.68	2.07741	0.000399369	0.0272468	732.337	2.02392	2.05067
NM_012310	KIF4A	A_23_P148475	ref|Homo sapiens kinesin family member 4A (KIF4A), mRNA [NM_012310]	0.000719653	0.0400904	903.818	2.12648	0.000554293	0.0329201	829.89	1.97315	2.04982
NM_024089	KDELC1	A_23_P128613	ref|Homo sapiens KDEL (Lys-Asp-Glu-Leu) containing 1 (KDELC1), mRNA [NM_024089]	0.00045735	0.0299696	768.308	2.19334	0.000826105	0.0426587	966.885	1.90628	2.04981
NM_001005464	HIST2H3A	A_33_P3257678	ref|Homo sapiens histone cluster 2, H3a (HIST2H3A), mRNA [NM_001005464]	0.000539218	0.0333095	812.363	2.16959	0.000737743	0.0395647	923.889	1.91821	2.0439
NM_002764	PRPS1	A_23_P95764	ref|Homo sapiens phosphoribosyl pyrophosphate synthetase 1 (PRPS1), mRNA [NM_002764]	0.000588153	0.0350761	838.5	2.13707	0.000643815	0.0360052	877.817	1.94762	2.04234
NM_003384	VRK1	A_23_P76761	ref|Homo sapiens vaccinia related kinase 1 (VRK1), mRNA [NM_003384]	0.000819611	0.0427328	953.478	2.08778	0.000501415	0.0311527	795.843	1.99305	2.04041
NM_004523	KIF11	A_24_P227091	ref|Homo sapiens kinesin family member 11 (KIF11), mRNA [NM_004523]	0.000513243	0.0321657	798.956	2.17458	0.000841644	0.0427948	973.772	1.90344	2.03901
NM_032637	SKP2	A_23_P156310	ref|Homo sapiens S-phase kinase-associated protein 2 (p45) (SKP2), transcript variant 2, mRNA [NM_032637]	0.000815437	0.0427737	951.417	2.09012	0.000511155	0.0315308	802.341	1.98645	2.03829
NM_182896	ARL13B	A_23_P10081	ref|Homo sapiens ADP-ribosylation factor-like 13B (ARL13B), transcript variant 1, mRNA [NM_182896]	0.000652396	0.0376573	873.449	2.13508	0.000643351	0.0360728	877.575	1.93859	2.03683
NM_001134478	PLCXD2	A_33_P3214343	ref|Homo sapiens phosphatidylinositol-specific phospholipase C, X domain containing 2 (PLCXD2), transcript variant 1, mRNA [NM_001134478]	0.000403776	0.0279454	730.184	2.20866	0.00105385	0.0491243	1063.92	1.86176	2.03521
NM_176072	P2RY2	A_23_P24903	ref|Homo sapiens purinergic receptor P2Y, G-protein coupled, 2 (P2RY2), transcript variant 1, mRNA [NM_176072]	0.000744237	0.0407751	915.905	2.11094	0.000598822	0.0346113	852.602	1.95769	2.03432
NM_003016	SFRS2	A_23_P77776	ref|Homo sapiens splicing factor, arginine/serine-rich 2 (SFRS2), mRNA [NM_003016]	0.000541537	0.0334049	813.44	2.16621	0.000922353	0.0449887	1009.21	1.89758	2.03189
NM_014264	PLK4	A_23_P155969	ref|Homo sapiens polo-like kinase 4 (Drosophila) (PLK4), mRNA [NM_014264]	0.000732177	0.0404744	910.235	2.11968	0.000625957	0.0354199	868.117	1.94243	2.03105
NM_032181	FAM176A	A_23_P108673	ref|Homo sapiens family with sequence similarity 176, member A (FAM176A), transcript variant 2, mRNA [NM_032181]	0.000626652	0.036712	858.975	2.13829	0.000897073	0.0445622	997.401	1.90536	2.02182
NM_198563	TMEM110	A_33_P3303577	ref|Homo sapiens transmembrane protein 110 (TMEM110), mRNA [NM_198563]	0.000899392	0.0454098	989.543	2.08245	0.000607171	0.0348602	856.448	1.96008	2.02127
NM_001099678	LRRC58	A_32_P190049	ref|Homo sapiens leucine rich repeat containing 58 (LRRC58), mRNA [NM_001099678]	0.000859734	0.044131	972.32	2.08077	0.000627812	0.0354784	869.267	1.94767	2.01422
NM_178826	ANO4	A_23_P409093	ref|Homo sapiens anoctamin 4 (ANO4), mRNA [NM_178826]	0.000750267	0.0407945	918.704	2.10819	0.000743077	0.0397519	926.61	1.91237	2.01028
ENST00000394874	PRKCE	A_33_P3252191	ens|Protein kinase C epsilon type (EC 2.7.11.13)(nPKC-epsilon) [Source:UniProtKB/Swiss-Prot;Acc:Q02156] [ENST00000394874]	0.000784359	0.0420124	935.622	2.09867	0.000958069	0.0461564	1024.51	1.88114	1.9899
NM_004412	TRDMT1	A_23_P115636	ref|Homo sapiens tRNA aspartic acid methyltransferase 1 (TRDMT1), transcript variant a, mRNA [NM_004412]	0.00104527	0.0498562	1048.13	2.0472	0.000654251	0.0365415	881.541	1.92951	1.98835
NM_194247	HNRNPA3	A_32_P77502	ref|Homo sapiens heterogeneous nuclear ribonucleoprotein A3 (HNRNPA3), mRNA [NM_194247]	0.00102973	0.0496089	1042.3	2.05311	0.000867851	0.043715	985.015	1.9033	1.9782
NM_003536	HIST1H3H	A_33_P3404989	ref|Homo sapiens histone cluster 1, H3h (HIST1H3H), mRNA [NM_003536]	0.00100909	0.0489977	1032.23	2.01657	0.000767197	0.0404401	940.067	1.91295	1.96476

## Sheet: shWWOX-A & shWWOX-B q<0.05 DOWN
SystematicName	GeneName	ProbeName	Description	p-Values (sh-A)	q-Values (sh-A)	RP-Values (sh-A)	FoldChanges (sh-A)	p-Values (sh-B)	q-Values (sh-B)	RP-Values (sh-B)	FoldChanges (sh-B)	Average Fold Changes
NM_001010909	MUC21	A_33_P3275035	ref|Homo sapiens mucin 21, cell surface associated (MUC21), mRNA [NM_001010909]	0	0	2.71442	-16.8801	0	0	5.94392	-10.7741	-13.8271
NM_000196	HSD11B2	A_23_P14986	ref|Homo sapiens hydroxysteroid (11-beta) dehydrogenase 2 (HSD11B2), mRNA [NM_000196]	0	0	9.43539	-8.24815	0	0	6.21446	-10.1769	-9.2125
NM_001003940	BMF	A_23_P379649	ref|Homo sapiens Bcl2 modifying factor (BMF), transcript variant 1, mRNA [NM_001003940]	0	0	19.2055	-7.25903	0	0	13.8418	-6.7914	-7.02521
NM_003986	BBOX1	A_23_P127495	ref|Homo sapiens butyrobetaine (gamma), 2-oxoglutarate dioxygenase (gamma-butyrobetaine hydroxylase) 1 (BBOX1), mRNA [NM_003986]	0	0	10.591	-7.98168	0	0	19.6264	-6.0151	-6.99839
NM_005416	SPRR3	A_23_P62709	ref|Homo sapiens small proline-rich protein 3 (SPRR3), transcript variant 1, mRNA [NM_005416]	2.31922e-07	0.000238095	70.607	-4.71439	0	0	8.89592	-8.39348	-6.55393
NM_000779	CYP4B1	A_23_P114713	ref|Homo sapiens cytochrome P450, family 4, subfamily B, polypeptide 1 (CYP4B1), transcript variant 2, mRNA [NM_000779]	0	0	8.70659	-8.00028	0	0	43.1005	-4.95554	-6.47791
NM_138288	SPTSSA	A_33_P3307875	ref|Homo sapiens chromosome 14 open reading frame 147 (C14orf147), mRNA [NM_138288]	2.31922e-07	0.000238095	72.5582	-4.64237	0	0	9.6226	-8.28472	-6.46355
NM_002964	S100A8	A_23_P434809	ref|Homo sapiens S100 calcium binding protein A8 (S100A8), mRNA [NM_002964]	0	0	32.7927	-5.89681	0	0	13.6082	-6.8812	-6.38901
NM_001692	ATP6V1B1	A_23_P142815	ref|Homo sapiens ATPase, H+ transporting, lysosomal 56/58kDa, V1 subunit B1 (ATP6V1B1), mRNA [NM_001692]	0	0	26.3291	-6.4535	0	0	19.9465	-5.99026	-6.22188
NM_001001552	LEMD1	A_24_P696761	ref|Homo sapiens LEM domain containing 1 (LEMD1), mRNA [NM_001001552]	2.31922e-07	0.000238095	67.8255	-4.77331	0	0	13.9248	-6.66513	-5.71922
ENST00000377158	C12ORF76	A_33_P3352718	ens|HCG2015786Putative uncharacterized protein ENSP00000366363 Fragment ; [Source:UniProtKB/TrEMBL;Acc:A8MQ46] [ENST00000377158]	0	0	26.381	-9.24642	0.000708057	0.0405984	907.93	-2.02022	-5.63332
NM_000240	MAOA	A_33_P3242543	ref|Homo sapiens monoamine oxidase A (MAOA), nuclear gene encoding mitochondrial protein, mRNA [NM_000240]	3.94267e-06	0.00166667	155.373	-3.70699	0	0	11.5978	-7.2501	-5.47854
NM_001080525	SPINK8	A_33_P3258542	ref|Homo sapiens serine peptidase inhibitor, Kazal type 8 (putative) (SPINK8), mRNA [NM_001080525]	0	0	32.3299	-5.92645	0	0	36.418	-5.01225	-5.46935
NM_004864	GDF15	A_23_P16523	ref|Homo sapiens growth differentiation factor 15 (GDF15), mRNA [NM_004864]	0	0	18.1712	-7.27038	3.47883e-06	0.00130435	132.8	-3.60866	-5.43952
NM_006762	LAPTM5	A_23_P86283	ref|Homo sapiens lysosomal protein transmembrane 5 (LAPTM5), mRNA [NM_006762]	0	0	27.4094	-6.63806	2.31922e-07	0.00015873	79.5963	-4.03936	-5.33871
NM_007289	MME	A_24_P260101	ref|Homo sapiens membrane metallo-endopeptidase (MME), transcript variant 2b, mRNA [NM_007289]	2.31922e-07	0.000238095	53.8367	-5.07503	0	0	33.6998	-5.32757	-5.2013
NM_001873	CPE	A_23_P259442	ref|Homo sapiens carboxypeptidase E (CPE), mRNA [NM_001873]	6.95765e-07	0.000638298	77.3652	-4.51536	0	0	26.9547	-5.77415	-5.14475
NM_002888	RARRES1	A_23_P18078	ref|Homo sapiens retinoic acid receptor responder (tazarotene induced) 1 (RARRES1), transcript variant 2, mRNA [NM_002888]	0	0	45.0577	-5.439	0	0	49.7157	-4.71609	-5.07755
NM_004089	TSC22D3	A_33_P3237634	ref|Homo sapiens TSC22 domain family, member 3 (TSC22D3), transcript variant 2, mRNA [NM_004089]	0	0	38.397	-5.58713	2.31922e-07	0.00015873	75.4933	-4.26918	-4.92816
NM_000187	HGD	A_23_P250164	ref|Homo sapiens homogentisate 1,2-dioxygenase (homogentisate oxidase) (HGD), mRNA [NM_000187]	0	0	41.6546	-5.54354	2.31922e-07	0.00015873	81.5736	-4.26646	-4.905
NM_178134	CYP4Z1	A_23_P103971	ref|Homo sapiens cytochrome P450, family 4, subfamily Z, polypeptide 1 (CYP4Z1), mRNA [NM_178134]	0	0	51.3539	-5.1815	2.31922e-07	0.00015873	62.5818	-4.33331	-4.75741
NM_198993	STAC2	A_32_P152195	ref|Homo sapiens SH3 and cysteine rich domain 2 (STAC2), mRNA [NM_198993]	2.31922e-07	0.000238095	68.3933	-4.75122	0	0	55.1127	-4.71577	-4.73349
ENST00000314088	HIST1H2AC	A_23_P167983	ens|Histone H2A type 1-C (H2A/l) [Source:UniProtKB/Swiss-Prot;Acc:Q93077] [ENST00000314088]	6.95765e-07	0.000638298	77.3997	-4.51983	0	0	49.7965	-4.92283	-4.72133
NM_139211	HOPX	A_23_P254507	ref|Homo sapiens HOP homeobox (HOPX), transcript variant 2, mRNA [NM_139211]	3.71075e-06	0.00170213	149.002	-3.75836	0	0	25.1141	-5.68286	-4.72061
NM_001033113	ENTPD8	A_33_P3420224	ref|Homo sapiens ectonucleoside triphosphate diphosphohydrolase 8 (ENTPD8), transcript variant 1, mRNA [NM_001033113]	2.31922e-07	0.000238095	54.9184	-5.07713	2.31922e-07	0.00015873	73.8262	-4.28713	-4.68213
NM_032034	SLC4A11	A_23_P154688	ref|Homo sapiens solute carrier family 4, sodium borate transporter, member 11 (SLC4A11), mRNA [NM_032034]	2.31922e-07	0.000238095	68.2605	-4.73563	0	0	59.3735	-4.60211	-4.66887
NM_004751	GCNT3	A_23_P420209	ref|Homo sapiens glucosaminyl (N-acetyl) transferase 3, mucin type (GCNT3), mRNA [NM_004751]	9.27687e-07	0.000769231	87.6755	-4.40028	0	0	43.4822	-4.8462	-4.62324
NR_026558	AQP7P3	A_33_P3371115	ref|Homo sapiens aquaporin 7 pseudogene 3 (AQP7P3), non-coding RNA [NR_026558]	6.95765e-07	0.000638298	78.5453	-4.55364	0	0	61.8722	-4.57725	-4.56544
NM_018004	TMEM45A	A_33_P3344831	ref|Homo sapiens transmembrane protein 45A (TMEM45A), mRNA [NM_018004]	4.80078e-05	0.00802326	349.602	-2.8556	0	0	17.7581	-6.26501	-4.56031
NM_145287	ZNF519	A_23_P328766	ref|Homo sapiens zinc finger protein 519 (ZNF519), mRNA [NM_145287]	6.95765e-07	0.000638298	79.0829	-4.52109	2.31922e-07	0.00015873	66.011	-4.49489	-4.50799
NM_001547	IFIT2	A_23_P24004	ref|Homo sapiens interferon-induced protein with tetratricopeptide repeats 2 (IFIT2), mRNA [NM_001547]	2.31922e-07	0.000238095	68.342	-4.74287	1.39153e-06	0.000821918	90.6009	-4.08896	-4.41592
NM_000331	SAA1	A_24_P335092	ref|Homo sapiens serum amyloid A1 (SAA1), transcript variant 1, mRNA [NM_000331]	9.27687e-07	0.000769231	84.6935	-4.39657	2.31922e-07	0.00015873	71.8031	-4.41617	-4.40637
BC022023	ANKRD20A5	A_33_P3324333	gb|Homo sapiens ankyrin repeat domain 20 family, member A5, mRNA (cDNA clone MGC:26718 IMAGE:4824658), complete cds. [BC022023]	1.62345e-06	0.00111111	118.467	-4.10827	0	0	59.2803	-4.65631	-4.38229
NM_153690	FAM43A	A_33_P3410589	ref|Homo sapiens family with sequence similarity 43, member A (FAM43A), mRNA [NM_153690]	9.27687e-07	0.000769231	86.6821	-4.4235	1.39153e-06	0.000821918	92.0422	-4.08613	-4.25481
NM_004696	SLC16A4	A_33_P3227920	ref|Homo sapiens solute carrier family 16, member 4 (monocarboxylic acid transporter 5) (SLC16A4), mRNA [NM_004696]	6.95765e-07	0.000638298	77.9078	-4.48654	1.62345e-06	0.000833333	93.1423	-4.00753	-4.24704
NM_001130845	BCL6	A_23_P57856	ref|Homo sapiens B-cell CLL/lymphoma 6 (BCL6), transcript variant 2, mRNA [NM_001130845]	4.40651e-06	0.00180952	156.904	-3.7145	0	0	53.0466	-4.75779	-4.23614
NM_001185	AZGP1	A_23_P71270	ref|Homo sapiens alpha-2-glycoprotein 1, zinc-binding (AZGP1), mRNA [NM_001185]	2.31922e-07	0.000238095	63.3794	-4.83584	3.94267e-06	0.00134921	147.841	-3.43472	-4.13528
NM_002065	GLUL	A_24_P53976	ref|Homo sapiens glutamate-ammonia ligase (glutamine synthetase) (GLUL), transcript variant 1, mRNA [NM_002065]	6.95765e-07	0.000638298	77.2748	-4.57046	2.31922e-06	0.000952381	121.464	-3.68376	-4.12711
NM_002259	KLRC1	A_23_P151046	ref|Homo sapiens killer cell lectin-like receptor subfamily C, member 1 (KLRC1), transcript variant 1, mRNA [NM_002259]	2.0873e-06	0.00107143	133.141	-3.8776	2.31922e-07	0.00015873	69.0197	-4.36425	-4.12092
NM_000442	PECAM1	A_33_P3405213	ref|Homo sapiens platelet/endothelial cell adhesion molecule (PECAM1), mRNA [NM_000442]	5.10228e-06	0.002	164.947	-3.60468	0	0	57.1204	-4.59814	-4.10141
NM_024626	VTCN1	A_23_P518	ref|Homo sapiens V-set domain containing T cell activation inhibitor 1 (VTCN1), mRNA [NM_024626]	6.12273e-05	0.00963504	372.13	-2.85415	0	0	31.0059	-5.31353	-4.08384
NM_001141	ALOX15B	A_23_P60627	ref|Homo sapiens arachidonate 15-lipoxygenase, type B (ALOX15B), transcript variant d, mRNA [NM_001141]	7.88534e-06	0.00248175	197.906	-3.42362	0	0	58.1894	-4.71925	-4.07143
NR_004405	LAMB2L	A_33_P3413815	ref|Homo sapiens laminin, beta 2-like (LAMB2L), non-coding RNA [NR_004405]	2.31922e-07	0.000238095	67.405	-4.70427	4.40651e-06	0.00145038	152.468	-3.43751	-4.07089
NM_005410	SEPP1	A_23_P121926	ref|Homo sapiens selenoprotein P, plasma, 1 (SEPP1), transcript variant 1, mRNA [NM_005410]	0.000211049	0.0197826	577.262	-2.47	0	0	27.4599	-5.59051	-4.03025
NM_002231	CD82	A_23_P1782	ref|Homo sapiens CD82 molecule (CD82), transcript variant 1, mRNA [NM_002231]	1.62345e-06	0.00111111	111.948	-4.07013	1.62345e-06	0.000833333	96.5061	-3.98636	-4.02824
NM_015568	PPP1R16B	A_23_P352535	ref|Homo sapiens protein phosphatase 1, regulatory (inhibitor) subunit 16B (PPP1R16B), mRNA [NM_015568]	5.10228e-06	0.002	165.525	-3.61258	2.31922e-07	0.00015873	68.0832	-4.41413	-4.01335
NM_005213	CSTA	A_23_P41114	ref|Homo sapiens cystatin A (stefin A) (CSTA), mRNA [NM_005213]	7.18957e-06	0.00236641	188.536	-3.48359	2.31922e-07	0.00015873	70.9634	-4.44346	-3.96353
NM_170744	UNC5B	A_23_P52336	ref|Homo sapiens unc-5 homolog B (C. elegans) (UNC5B), mRNA [NM_170744]	1.62345e-06	0.00111111	119.175	-3.97509	1.62345e-06	0.000833333	95.7179	-3.94784	-3.96147
NR_026755	CYP4F29P	A_32_P405902	ref|Homo sapiens chromosome 21 open reading frame 15 (C21orf15), non-coding RNA [NR_026755]	4.87036e-06	0.00192661	161.376	-3.66729	2.31922e-07	0.00015873	81.0277	-4.23053	-3.94891
NR_027270	ANKRD20A11P	A_32_P68942	ref|Homo sapiens chromosome 21 open reading frame 81 (C21orf81), non-coding RNA [NR_027270]	1.64664e-05	0.00403409	248.883	-3.19748	0	0	61.9445	-4.64188	-3.91968
ENST00000343088	ENST00000343088	A_33_P3319261	ens|Probable exonuclease mut-7 homolog (EC 3.1.-.-)(Exonuclease 3'-5' domain-containing protein 3) [Source:UniProtKB/Swiss-Prot;Acc:Q8N9H8] [ENST00000343088]	1.62345e-06	0.00111111	119.978	-3.9804	2.0873e-06	0.000909091	114.085	-3.77717	-3.87878
NM_013314	BLNK	A_33_P3363637	ref|Homo sapiens B-cell linker (BLNK), transcript variant 1, mRNA [NM_013314]	1.62345e-06	0.00111111	117.416	-4.00863	2.31922e-06	0.000952381	114.886	-3.74073	-3.87468
NM_020879	CCDC146	A_23_P168771	ref|Homo sapiens coiled-coil domain containing 146 (CCDC146), mRNA [NM_020879]	7.65342e-06	0.00242647	195.819	-3.46469	1.39153e-06	0.000821918	87.6503	-4.19688	-3.83079
NM_000050	ASS1	A_33_P3234580	ref|Homo sapiens argininosuccinate synthetase 1 (ASS1), transcript variant 1, mRNA [NM_000050]	1.85537e-06	0.00102564	130.362	-3.86846	2.31922e-06	0.000952381	119.801	-3.72952	-3.79899
NM_001012421	ANKRD20A2	A_32_P204376	ref|Homo sapiens ankyrin repeat domain 20 family, member A2 (ANKRD20A2), mRNA [NM_001012421]	1.15961e-05	0.00328947	222.048	-3.35632	4.63843e-07	0.000307692	81.9718	-4.24114	-3.79873
NM_003810	TNFSF10	A_33_P3226810	ref|Homo sapiens tumor necrosis factor (ligand) superfamily, member 10 (TNFSF10), mRNA [NM_003810]	9.74071e-06	0.00291667	207.548	-3.3668	2.31922e-07	0.00015873	74.1704	-4.22142	-3.79411
NM_152456	IL34	A_23_P100386	ref|Homo sapiens interleukin 34 (IL34), mRNA [NM_152456]	2.31922e-07	0.000238095	67.4043	-4.74235	2.92221e-05	0.00522822	286.606	-2.79829	-3.77032
NM_005823	MSLN	A_23_P77529	ref|Homo sapiens mesothelin (MSLN), transcript variant 1, mRNA [NM_005823]	6.49381e-06	0.00222222	182.504	-3.55026	1.85537e-06	0.000851064	106.573	-3.90316	-3.72671
NM_014033	METTL7A	A_23_P415021	ref|Homo sapiens methyltransferase like 7A (METTL7A), mRNA [NM_014033]	1.85537e-06	0.00102564	130.987	-3.87136	3.47883e-06	0.00130435	137.581	-3.51985	-3.6956
NM_002889	RARRES2	A_23_P134237	ref|Homo sapiens retinoic acid receptor responder (tazarotene induced) 2 (RARRES2), mRNA [NM_002889]	1.15961e-06	0.000877193	98.5858	-4.23911	9.74071e-06	0.00248521	198.963	-3.12391	-3.68151
NM_024843	CYBRD1	A_23_P209564	ref|Homo sapiens cytochrome b reductase 1 (CYBRD1), transcript variant 1, mRNA [NM_024843]	1.22918e-05	0.0033758	229.675	-3.31	1.39153e-06	0.000821918	88.9023	-4.04586	-3.67793
AK094730	LOC283454	A_33_P3687198	gb|Homo sapiens cDNA FLJ37411 fis, clone BRAMY2028682. [AK094730]	3.94267e-06	0.00166667	154.724	-3.73085	3.47883e-06	0.00130435	133.962	-3.60335	-3.6671
NM_007333	KLRC3	A_23_P128281	ref|Homo sapiens killer cell lectin-like receptor subfamily C, member 3 (KLRC3), transcript variant 2, mRNA [NM_007333]	1.62345e-06	0.00111111	113.123	-4.04682	6.95765e-06	0.00201342	174.734	-3.28733	-3.66707
NR_027995	LOC284232	A_32_P150086	ref|Homo sapiens ankyrin repeat domain 20 family, member A2 pseudogene (LOC284232), non-coding RNA [NR_027995]	2.3656e-05	0.00507463	274.421	-3.1352	1.39153e-06	0.000821918	88.3095	-4.17929	-3.65725
NM_005218	DEFB1	A_23_P71480	ref|Homo sapiens defensin, beta 1 (DEFB1), mRNA [NM_005218]	1.85537e-06	0.00102564	128.881	-3.8644	4.40651e-06	0.00145038	157.301	-3.38924	-3.62682
ENST00000397935	AZGP1P1	A_24_P49267	ens|Putative zinc-alpha-2-glycoprotein-like 1 Precursor [Source:UniProtKB/Swiss-Prot;Acc:A8MT79] [ENST00000397935]	6.49381e-06	0.00222222	184.077	-3.48779	1.85537e-06	0.000851064	112.763	-3.7639	-3.62585
NM_015692	CPAMD8	A_23_P67198	ref|Homo sapiens C3 and PZP-like, alpha-2-macroglobulin domain containing 8 (CPAMD8), mRNA [NM_015692]	6.26189e-06	0.00225	178.787	-3.57018	2.31922e-06	0.000952381	121.807	-3.6695	-3.61984
BX457161	BX457161	A_33_P3213086	gb|BX457161 Homo sapiens THYMUS Homo sapiens cDNA clone CS0CAP006YB04 5-PRIME, mRNA sequence [BX457161]	1.34515e-05	0.00351515	237.587	-3.2331	1.85537e-06	0.000851064	101.833	-3.96899	-3.60104
NM_182532	TMEM61	A_23_P11629	ref|Homo sapiens transmembrane protein 61 (TMEM61), mRNA [NM_182532]	2.31922e-06	0.00116279	137.222	-3.78833	4.40651e-06	0.00145038	153.013	-3.3961	-3.59222
NM_199328	CLDN8	A_23_P427014	ref|Homo sapiens claudin 8 (CLDN8), mRNA [NM_199328]	3.47883e-06	0.0016129	148.036	-3.69758	3.71075e-06	0.00133333	138.642	-3.48324	-3.59041
NM_015967	PTPN22	A_33_P3241984	ref|Homo sapiens protein tyrosine phosphatase, non-receptor type 22 (lymphoid) (PTPN22), transcript variant 1, mRNA [NM_015967]	2.78306e-06	0.00134831	142.839	-3.78496	5.79804e-06	0.00177305	163.291	-3.35422	-3.56959
NM_002965	S100A9	A_23_P23048	ref|Homo sapiens S100 calcium binding protein A9 (S100A9), mRNA [NM_002965]	5.56612e-06	0.00208696	172.047	-3.60335	3.47883e-06	0.00130435	135.065	-3.53549	-3.56942
NM_030754	SAA2	A_33_P3408918	ref|Homo sapiens serum amyloid A2 (SAA2), transcript variant 1, mRNA [NM_030754]	3.71075e-06	0.00170213	152.175	-3.70463	4.40651e-06	0.00145038	154.214	-3.38345	-3.54404
NR_024344	MIR4697	A_32_P63013	ref|Homo sapiens hypothetical LOC283174 (LOC283174), non-coding RNA [NR_024344]	3.94267e-06	0.00166667	155.493	-3.63585	4.17459e-06	0.00140625	151.058	-3.40695	-3.5214
NM_014353	RAB26	A_33_P3209229	ref|Homo sapiens RAB26, member RAS oncogene family (RAB26), mRNA [NM_014353]	5.56612e-06	0.00208696	173.192	-3.59179	3.94267e-06	0.00134921	146.117	-3.44962	-3.52071
NM_032250	ANKRD20A1	A_33_P3313532	ref|Homo sapiens ankyrin repeat domain 20 family, member A1 (ANKRD20A1), mRNA [NM_032250]	2.41199e-05	0.00509804	276.156	-3.09673	1.85537e-06	0.000851064	103.605	-3.92513	-3.51093
NM_020353	PLSCR4	A_23_P91910	ref|Homo sapiens phospholipid scramblase 4 (PLSCR4), transcript variant 2, mRNA [NM_020353]	1.62345e-06	0.00111111	112.701	-4.07603	1.71622e-05	0.00381443	235.286	-2.94246	-3.50924
NM_138805	FAM3D	A_23_P41145	ref|Homo sapiens family with sequence similarity 3, member D (FAM3D), mRNA [NM_138805]	1.62345e-06	0.00111111	113.63	-4.0779	2.13368e-05	0.00431925	255.279	-2.92513	-3.50151
NM_014509	SERHL2	A_23_P120953	ref|Homo sapiens serine hydrolase-like 2 (SERHL2), mRNA [NM_014509]	1.76261e-05	0.00422222	253.858	-3.20718	1.85537e-06	0.000851064	109.431	-3.77143	-3.48931
NR_003503	GGT8P	A_24_P375322	ref|Homo sapiens gamma-glutamyltransferase 8 pseudogene (GGT8P), non-coding RNA [NR_003503]	4.63843e-06	0.00186916	159.25	-3.705	6.72573e-06	0.00197279	172.175	-3.2451	-3.47505
NM_016725	FOLR1	A_23_P53176	ref|Homo sapiens folate receptor 1 (adult) (FOLR1), transcript variant 1, mRNA [NM_016725]	1.85537e-06	0.00102564	132.723	-3.87082	9.50879e-06	0.00244048	198.894	-3.07903	-3.47492
NM_003782	B3GALT4	A_23_P422071	ref|Homo sapiens UDP-Gal:betaGlcNAc beta 1,3-galactosyltransferase, polypeptide 4 (B3GALT4), mRNA [NM_003782]	1.71622e-05	0.0041573	250.664	-3.23245	2.31922e-06	0.000952381	121.969	-3.70807	-3.47026
NM_138434	C7ORF29	A_23_P316460	ref|Homo sapiens chromosome 7 open reading frame 29 (C7orf29), mRNA [NM_138434]	2.62072e-05	0.00538095	282.442	-3.11346	2.31922e-06	0.000952381	114.943	-3.79795	-3.45571
XM_001715587	LOC126987	A_33_P3286162	ref|PREDICTED: Homo sapiens similar to hCG2040319 (LOC126987), mRNA [XM_001715587]	3.94267e-06	0.00166667	154.918	-3.65919	6.95765e-06	0.00201342	173.654	-3.23983	-3.44951
NM_004925	AQP3	A_33_P3209591	ref|Homo sapiens aquaporin 3 (Gill blood group) (AQP3), mRNA [NM_004925]	7.00404e-05	0.010378	387.793	-2.74249	4.63843e-07	0.000307692	83.2642	-4.14729	-3.44489
NM_001712	CEACAM1	A_24_P382319	ref|Homo sapiens carcinoembryonic antigen-related cell adhesion molecule 1 (biliary glycoprotein) (CEACAM1), transcript variant 1, mRNA [NM_001712]	1.25238e-05	0.00333333	231.858	-3.24167	2.55114e-06	0.001	126.838	-3.64252	-3.4421
NM_001312	CRIP2	A_23_P112798	ref|Homo sapiens cysteine-rich protein 2 (CRIP2), mRNA [NM_001312]	1.85537e-06	0.00102564	128.399	-3.90778	1.34515e-05	0.00311828	223.166	-2.97528	-3.44153
NM_033285	TP53INP1	A_23_P168882	ref|Homo sapiens tumor protein p53 inducible nuclear protein 1 (TP53INP1), transcript variant 1, mRNA [NM_033285]	9.27687e-06	0.00283688	205.78	-3.39196	3.94267e-06	0.00134921	146.634	-3.4437	-3.41783
NM_000591	CD14	A_33_P3284508	ref|Homo sapiens CD14 molecule (CD14), transcript variant 1, mRNA [NM_000591]	1.64664e-05	0.00403409	249.579	-3.16696	3.2469e-06	0.00125	130.006	-3.61983	-3.3934
NM_006813	PNRC1	A_23_P145074	ref|Homo sapiens proline-rich nuclear receptor coactivator 1 (PNRC1), mRNA [NM_006813]	9.81029e-05	0.0121552	436.054	-2.68819	1.39153e-06	0.000821918	87.623	-4.07207	-3.38013
NM_005767	LPAR6	A_23_P2705	ref|Homo sapiens lysophosphatidic acid receptor 6 (LPAR6), transcript variant 1, mRNA [NM_005767]	6.49381e-06	0.00222222	182.897	-3.53987	8.11726e-06	0.0022293	185.079	-3.18265	-3.36126
NM_000624	SERPINA5	A_24_P321766	ref|Homo sapiens serpin peptidase inhibitor, clade A (alpha-1 antiproteinase, antitrypsin), member 5 (SERPINA5), mRNA [NM_000624]	1.22918e-05	0.0033758	230.673	-3.28526	4.17459e-06	0.00140625	150.425	-3.40937	-3.34732
NM_001085	SERPINA3	A_33_P3399788	ref|Homo sapiens serpin peptidase inhibitor, clade A (alpha-1 antiproteinase, antitrypsin), member 3 (SERPINA3), mRNA [NM_001085]	2.69029e-05	0.00544601	287.063	-3.04307	3.47883e-06	0.00130435	130.784	-3.64113	-3.3421
NM_001080518	LIPK	A_33_P3262510	ref|Homo sapiens lipase, family member K (LIPK), mRNA [NM_001080518]	6.49381e-06	0.00222222	179.554	-3.5578	9.97263e-06	0.00252941	201.19	-3.12625	-3.34203
NM_007238	PXMP4	A_33_P3387365	ref|Homo sapiens peroxisomal membrane protein 4, 24kDa (PXMP4), transcript variant 1, mRNA [NM_007238]	1.15961e-05	0.00328947	221.949	-3.335	5.79804e-06	0.00177305	162.436	-3.32654	-3.33077
NM_013431	KLRC4	A_23_P218058	ref|Homo sapiens killer cell lectin-like receptor subfamily C, member 4 (KLRC4), mRNA [NM_013431]	1.85537e-05	0.00434783	256.77	-3.16651	3.94267e-06	0.00134921	144.619	-3.45113	-3.30882
NM_032432	ABLIM2	A_23_P255672	ref|Homo sapiens actin binding LIM protein family, member 2 (ABLIM2), transcript variant 6, mRNA [NM_032432]	9.74071e-06	0.00291667	209.744	-3.38743	8.5811e-06	0.00228395	191.122	-3.2177	-3.30256
NM_000755	CRAT	A_33_P3280531	ref|Homo sapiens carnitine acetyltransferase (CRAT), nuclear gene encoding mitochondrial protein, transcript variant 1, mRNA [NM_000755]	3.06137e-05	0.006	297.544	-2.99047	3.47883e-06	0.00130435	130.501	-3.61352	-3.30199
NM_020412	CHMP1B	A_33_P3276475	ref|Homo sapiens chromatin modifying protein 1B (CHMP1B), mRNA [NM_020412]	1.36834e-05	0.0035119	239.447	-3.21658	5.56612e-06	0.00176471	160.381	-3.35749	-3.28704
NM_001145033	C11ORF96	A_32_P74409	ref|Homo sapiens hypothetical protein LOC387763 (LOC387763), mRNA [NM_001145033]	3.71075e-06	0.00170213	150.38	-3.73037	2.92221e-05	0.00522822	286.957	-2.83755	-3.28396
NM_145252	ZG16B	A_23_P118203	ref|Homo sapiens zymogen granule protein 16 homolog B (rat) (ZG16B), mRNA [NM_145252]	1.62345e-06	0.00111111	113.745	-4.03299	7.05042e-05	0.00886297	394.204	-2.53379	-3.28339
NM_138451	IQCD	A_24_P390060	ref|Homo sapiens IQ motif containing D (IQCD), mRNA [NM_138451]	1.46111e-05	0.00370588	242	-3.20341	4.40651e-06	0.00145038	157.574	-3.36181	-3.28261
NM_133639	RHOV	A_23_P424561	ref|Homo sapiens ras homolog gene family, member V (RHOV), mRNA [NM_133639]	8.3028e-05	0.0111875	412.198	-2.74068	2.0873e-06	0.000909091	113.913	-3.81773	-3.2792
NM_003389	CORO2A	A_23_P146444	ref|Homo sapiens coronin, actin binding protein, 2A (CORO2A), transcript variant 1, mRNA [NM_003389]	4.63843e-06	0.00186916	160.492	-3.68378	2.71348e-05	0.00497872	282.187	-2.79204	-3.23791
NM_003268	TLR5	A_23_P85903	ref|Homo sapiens toll-like receptor 5 (TLR5), mRNA [NM_003268]	3.71075e-06	0.00170213	153.217	-3.74748	5.12547e-05	0.00726974	356.593	-2.62019	-3.18383
NM_145244	DDIT4L	A_33_P3372099	ref|Homo sapiens DNA-damage-inducible transcript 4-like (DDIT4L), mRNA [NM_145244]	1.36834e-05	0.0035119	239.279	-3.20422	1.22918e-05	0.00294444	216.268	-3.06117	-3.1327
NM_144626	TMEM125	A_23_P115022	ref|Homo sapiens transmembrane protein 125 (TMEM125), mRNA [NM_144626]	2.0873e-06	0.00107143	135.075	-3.8441	0.000111554	0.0118182	463.798	-2.41515	-3.12962
NM_025087	CWH43	A_23_P110319	ref|Homo sapiens cell wall biogenesis 43 C-terminal homolog (S. cerevisiae) (CWH43), mRNA [NM_025087]	1.83218e-05	0.00431694	255.63	-3.14763	9.27687e-06	0.00242424	196.549	-3.10587	-3.12675
NM_005060	RORC	A_33_P3386671	ref|Homo sapiens RAR-related orphan receptor C (RORC), transcript variant 1, mRNA [NM_005060]	4.36013e-05	0.0075502	338.4	-2.88879	4.40651e-06	0.00145038	156.024	-3.36151	-3.12515
NM_017821	RHBDL2	A_23_P63432	ref|Homo sapiens rhomboid, veinlet-like 2 (Drosophila) (RHBDL2), mRNA [NM_017821]	2.22645e-05	0.00489796	271.18	-3.12504	9.27687e-06	0.00242424	196.116	-3.11806	-3.12155
NM_014428	TJP3	A_23_P108157	ref|Homo sapiens tight junction protein 3 (zona occludens 3) (TJP3), mRNA [NM_014428]	6.49381e-06	0.00222222	185.293	-3.51735	3.64117e-05	0.00575092	315.394	-2.70943	-3.11339
NM_003260	TLE2	A_23_P153676	ref|Homo sapiens transducin-like enhancer of split 2 (E(sp1) homolog, Drosophila) (TLE2), transcript variant 1, mRNA [NM_003260]	5.56612e-06	0.00208696	172.819	-3.5983	5.19505e-05	0.00717949	357.659	-2.60095	-3.09962
NM_001145710	FAM228B	A_33_P3362900	ref|Homo sapiens hypothetical protein LOC375190 (LOC375190), mRNA [NM_001145710]	9.46241e-05	0.0121068	428.898	-2.72867	3.94267e-06	0.00134921	147.034	-3.4416	-3.08514
NM_000152	GAA	A_23_P153026	ref|Homo sapiens glucosidase, alpha; acid (GAA), transcript variant 1, mRNA [NM_000152]	5.58931e-05	0.00912879	359.52	-2.86928	6.26189e-06	0.00190141	167.432	-3.29369	-3.08149
NM_021069	SORBS2	A_23_P121795	ref|Homo sapiens sorbin and SH3 domain containing 2 (SORBS2), transcript variant 2, mRNA [NM_021069]	1.62345e-05	0.004	247.731	-3.15191	1.32195e-05	0.00311475	220.088	-3.00745	-3.07968
NM_003740	KCNK5	A_23_P319423	ref|Homo sapiens potassium channel, subfamily K, member 5 (KCNK5), mRNA [NM_003740]	9.04495e-06	0.00278571	203.908	-3.37735	3.17733e-05	0.00550201	293.012	-2.75139	-3.06437
NM_001136007	FXYD3	A_33_P3228450	ref|Homo sapiens FXYD domain containing ion transport regulator 3 (FXYD3), transcript variant 3, mRNA [NM_001136007]	6.28508e-05	0.0097482	375.578	-2.82497	6.49381e-06	0.00194444	169.956	-3.2843	-3.05464
NM_013301	CCDC106	A_33_P3379726	ref|Homo sapiens coiled-coil domain containing 106 (CCDC106), mRNA [NM_013301]	5.10228e-06	0.002	162.508	-3.65219	9.16091e-05	0.0102865	435.917	-2.45201	-3.0521
NM_017708	FAM83E	A_33_P3216467	ref|Homo sapiens family with sequence similarity 83, member E (FAM83E), mRNA [NM_017708]	1.83218e-05	0.00431694	256.098	-3.13885	1.85537e-05	0.00392157	241.454	-2.94025	-3.03955
NM_016335	PRODH	A_33_P3338341	ref|Homo sapiens proline dehydrogenase (oxidase) 1 (PRODH), nuclear gene encoding mitochondrial protein, mRNA [NM_016335]	1.62345e-06	0.00111111	114.783	-4.00868	0.000660049	0.0390398	883.918	-2.06316	-3.03592
AK094963	FLJ37644	A_24_P497464	gb|Homo sapiens cDNA FLJ37644 fis, clone BRHIP2000239. [AK094963]	1.53068e-05	0.00385965	243.579	-3.20991	2.52795e-05	0.0047807	275.96	-2.82761	-3.01876
NM_014039	C11ORF54	A_24_P201404	ref|Homo sapiens chromosome 11 open reading frame 54 (C11orf54), mRNA [NM_014039]	3.08456e-05	0.00599099	299.468	-2.97918	1.22918e-05	0.00294444	216.422	-3.00937	-2.99427
NM_001034850	FAM134B	A_23_P167599	ref|Homo sapiens family with sequence similarity 134, member B (FAM134B), transcript variant 1, mRNA [NM_001034850]	1.60026e-05	0.00398844	246.199	-3.23157	3.45563e-05	0.0056015	307.9	-2.70543	-2.9685
NM_002306	LGALS3	A_33_P3306163	ref|Homo sapiens lectin, galactoside-binding, soluble, 3 (LGALS3), transcript variant 1, mRNA [NM_002306]	8.02449e-05	0.0111974	403.911	-2.76206	8.11726e-06	0.0022293	186.55	-3.15258	-2.95732
NM_024320	PRR15L	A_23_P118894	ref|Homo sapiens ATPase family, AAA domain containing 4 (ATAD4), mRNA [NM_024320]	3.80352e-05	0.00694915	321.123	-2.97932	1.85537e-05	0.00392157	245.626	-2.90545	-2.94239
NM_007365	PADI2	A_23_P201747	ref|Homo sapiens peptidyl arginine deiminase, type II (PADI2), mRNA [NM_007365]	1.02046e-05	0.0029932	214.733	-3.36996	9.04495e-05	0.0103175	433.221	-2.47395	-2.92196
ENST00000321276	SGPP2	A_24_P941217	ens|Sphingosine-1-phosphate phosphatase 2 (SPPase2)(Spp2)(hSPP2)(EC 3.1.3.-)(Sphingosine-1-phosphatase 2) [Source:UniProtKB/Swiss-Prot;Acc:Q8IWX5] [ENST00000321276]	2.78306e-05	0.0055814	289.398	-3.04368	2.69029e-05	0.00495726	280.314	-2.79842	-2.92105
NM_016061	YPEL5	A_23_P108835	ref|Homo sapiens yippee-like 5 (Drosophila) (YPEL5), transcript variant 4, mRNA [NM_016061]	0.000202468	0.0192715	568.595	-2.49023	5.56612e-06	0.00176471	161.169	-3.33804	-2.91414
ENST00000398832	ENST00000398832	A_32_P207767	ens|Putative uncharacterized protein ENSP00000381813 [Source:UniProtKB/TrEMBL;Acc:A8MZ04] [ENST00000398832]	4.17459e-05	0.00731707	332.702	-2.94458	2.3656e-05	0.00459459	269.191	-2.85061	-2.89759
NM_000359	TGM1	A_23_P65618	ref|Homo sapiens transglutaminase 1 (K polypeptide epidermal type I, protein-glutamine-gamma-glutamyltransferase) (TGM1), mRNA [NM_000359]	5.31101e-05	0.00870722	357.406	-2.87363	1.85537e-05	0.00392157	246.209	-2.90425	-2.88894
NM_144686	TMC4	A_23_P330461	ref|Homo sapiens transmembrane channel-like 4 (TMC4), transcript variant 2, mRNA [NM_144686]	3.5484e-05	0.00662338	314.448	-2.96479	2.48156e-05	0.00475556	272.675	-2.80293	-2.88386
NM_003353	UCN	A_33_P3353030	ref|Homo sapiens urocortin (UCN), mRNA [NM_003353]	0.000257897	0.0221514	621.73	-2.42909	5.79804e-06	0.00177305	163.901	-3.33834	-2.88371
NM_006186	NR4A2	A_33_P3299066	ref|Homo sapiens nuclear receptor subfamily 4, group A, member 2 (NR4A2), mRNA [NM_006186]	1.22918e-05	0.0033758	227.394	-3.28742	8.76664e-05	0.0101613	428.312	-2.46994	-2.87868
NM_017577	GRAMD1C	A_23_P253012	ref|Homo sapiens GRAM domain containing 1C (GRAMD1C), mRNA [NM_017577]	8.65068e-05	0.0114769	415.267	-2.71552	1.34515e-05	0.00311828	222.68	-3.01433	-2.86492
NM_001098537	PNPLA7	A_33_P3666884	ref|Homo sapiens patatin-like phospholipase domain containing 7 (PNPLA7), transcript variant 1, mRNA [NM_001098537]	4.91674e-05	0.00818533	351.787	-2.93161	2.99179e-05	0.00533058	288.929	-2.78152	-2.85656
NM_001077263	TMPRSS13	A_23_P435477	ref|Homo sapiens transmembrane protease, serine 13 (TMPRSS13), mRNA [NM_001077263]	2.11049e-05	0.0047644	265.983	-3.09708	5.51974e-05	0.0074375	366.991	-2.60406	-2.85057
NM_001130448	C15ORF62	A_32_P183970	ref|Homo sapiens chromosome 15 open reading frame 62 (C15orf62), mRNA [NM_001130448]	1.22918e-05	0.0033758	229.343	-3.24857	0.000105524	0.0114899	454.404	-2.44528	-2.84693
ENST00000403284	ROS1	A_33_P3421028	ens|Proto-oncogene tyrosine-protein kinase ROS Precursor (EC 2.7.10.1)(c-ros-1) [Source:UniProtKB/Swiss-Prot;Acc:P08922] [ENST00000403284]	3.45563e-05	0.00656388	311.125	-2.95579	3.38606e-05	0.0055303	305.902	-2.71633	-2.83606
NM_031426	AIF1L	A_23_P392384	ref|Homo sapiens allograft inflammatory factor 1-like (AIF1L), transcript variant 1, mRNA [NM_031426]	4.40651e-05	0.00753968	339.441	-2.9112	3.20052e-05	0.00547619	297.844	-2.7567	-2.83395
NM_022036	GPRC5C	A_23_P38167	ref|Homo sapiens G protein-coupled receptor, family C, group 5, member C (GPRC5C), transcript variant 1, mRNA [NM_022036]	0.000546176	0.0372627	816.101	-2.22571	4.40651e-06	0.00145038	156.859	-3.402	-2.81385
NM_173485	TSHZ2	A_23_P143247	ref|Homo sapiens teashirt zinc finger homeobox 2 (TSHZ2), mRNA [NM_173485]	9.64794e-05	0.0121994	433.686	-2.68187	1.53068e-05	0.0034555	231.061	-2.94153	-2.8117
NM_003944	SELENBP1	A_23_P86021	ref|Homo sapiens selenium binding protein 1 (SELENBP1), mRNA [NM_003944]	0.000354376	0.0279342	698.593	-2.3403	6.49381e-06	0.00194444	170.488	-3.28214	-2.81122
NM_004433	ELF3	A_23_P104188	ref|Homo sapiens E74-like factor 3 (ets domain transcription factor, epithelial-specific ) (ELF3), transcript variant 1, mRNA [NM_004433]	0.000107612	0.0128177	452.117	-2.68267	1.85537e-05	0.00392157	245.487	-2.91816	-2.80041
NM_001013653	LRRC26	A_33_P3269844	ref|Homo sapiens leucine rich repeat containing 26 (LRRC26), mRNA [NM_001013653]	3.87309e-05	0.00698745	324.541	-2.94658	4.24417e-05	0.00626712	331.715	-2.65388	-2.80023
NM_022162	NOD2	A_23_P420863	ref|Homo sapiens nucleotide-binding oligomerization domain containing 2 (NOD2), mRNA [NM_022162]	0.000105524	0.0126389	448.527	-2.63877	1.85537e-05	0.00392157	241.863	-2.93199	-2.78538
NM_080659	C11ORF52	A_33_P3396886	ref|Homo sapiens chromosome 11 open reading frame 52 (C11orf52), mRNA [NM_080659]	7.35192e-05	0.0107458	393.884	-2.78538	2.92221e-05	0.00522822	287.344	-2.77801	-2.78169
NM_000336	SCNN1B	A_32_P83098	ref|Homo sapiens sodium channel, nonvoltage-gated 1, beta (SCNN1B), mRNA [NM_000336]	0.00012918	0.0144301	480.414	-2.61329	1.46111e-05	0.00331579	229.85	-2.94648	-2.77989
NM_016524	SYT17	A_23_P163697	ref|Homo sapiens synaptotagmin XVII (SYT17), mRNA [NM_016524]	1.53068e-05	0.00385965	243.426	-3.23146	0.00017139	0.0163135	540.283	-2.32131	-2.77639
NM_058229	FBXO32	A_33_P3378126	ref|Homo sapiens F-box protein 32 (FBXO32), transcript variant 1, mRNA [NM_058229]	6.77211e-05	0.0102098	383.324	-2.82545	3.57159e-05	0.0057037	311.628	-2.71926	-2.77236
NM_006623	PHGDH	A_23_P85783	ref|Homo sapiens phosphoglycerate dehydrogenase (PHGDH), mRNA [NM_006623]	6.49381e-06	0.00222222	181.688	-3.47316	0.000612041	0.0375926	859.155	-2.05724	-2.7652
NM_001005404	YPEL2	A_24_P787947	ref|Homo sapiens yippee-like 2 (Drosophila) (YPEL2), mRNA [NM_001005404]	7.28234e-05	0.0107167	392.296	-2.80177	3.31648e-05	0.00552124	303.591	-2.71996	-2.76087
NM_001012993	C9ORF152	A_33_P3236676	ref|Homo sapiens chromosome 9 open reading frame 152 (C9orf152), mRNA [NM_001012993]	9.74071e-06	0.00291667	208.972	-3.38907	0.000437868	0.030305	755.583	-2.12478	-2.75692
NM_001995	ACSL1	A_23_P110212	ref|Homo sapiens acyl-CoA synthetase long-chain family member 1 (ACSL1), mRNA [NM_001995]	4.36013e-05	0.0075502	337.94	-2.8984	5.05589e-05	0.00721854	353.086	-2.61334	-2.75587
NM_175709	CBX7	A_23_P250735	ref|Homo sapiens chromobox homolog 7 (CBX7), mRNA [NM_175709]	8.18684e-05	0.0112063	409.51	-2.76421	3.20052e-05	0.00547619	299.114	-2.74512	-2.75467
NM_024074	TMEM38A	A_23_P101392	ref|Homo sapiens transmembrane protein 38A (TMEM38A), mRNA [NM_024074]	4.19778e-05	0.00732794	334.55	-2.90519	5.12547e-05	0.00726974	356.217	-2.59945	-2.75232
NM_001040100	SPTSSB	A_32_P199551	ref|Homo sapiens chromosome 3 open reading frame 57 (C3orf57), mRNA [NM_001040100]	6.49381e-06	0.00222222	185.186	-3.47112	0.000708057	0.0405984	908.095	-2.0206	-2.74586
NM_004734	DCLK1	A_23_P369994	ref|Homo sapiens doublecortin-like kinase 1 (DCLK1), mRNA [NM_004734]	1.02046e-05	0.0029932	213.092	-3.32825	0.000368987	0.0271966	711.922	-2.1526	-2.74043
NM_001098482	CRTC1	A_33_P3420204	ref|Homo sapiens CREB regulated transcription coactivator 1 (CRTC1), transcript variant 3, mRNA [NM_001098482]	4.56886e-05	0.00778656	342.245	-2.89485	5.35739e-05	0.00728707	363.407	-2.5809	-2.73787
NM_022358	KCNK15	A_23_P109026	ref|Homo sapiens potassium channel, subfamily K, member 15 (KCNK15), mRNA [NM_022358]	1.22918e-05	0.0033758	230.483	-3.34004	0.000362726	0.0269655	707.631	-2.13241	-2.73622
NM_032470	TNXB	A_23_P156708	ref|Homo sapiens tenascin XB (TNXB), transcript variant XB-S, mRNA [NM_032470]	7.3983e-05	0.0107407	394.954	-2.79331	3.96586e-05	0.00615108	321.755	-2.67196	-2.73263
NM_017712	PGPEP1	A_23_P327370	ref|Homo sapiens pyroglutamyl-peptidase I (PGPEP1), mRNA [NM_017712]	3.87309e-05	0.00698745	323.153	-2.92825	7.18957e-05	0.00893372	397.157	-2.51966	-2.72396
NM_017983	WIPI1	A_23_P141394	ref|Homo sapiens WD repeat domain, phosphoinositide interacting 1 (WIPI1), mRNA [NM_017983]	4.91674e-05	0.00818533	352.384	-2.88532	6.72573e-05	0.00860534	387.471	-2.53028	-2.7078
NM_024702	ZNF750	A_33_P3423420	ref|Homo sapiens zinc finger protein 750 (ZNF750), mRNA [NM_024702]	1.76261e-05	0.00422222	254.79	-3.16791	0.000277842	0.0226465	643.254	-2.24656	-2.70723
NM_006103	WFDC2	A_24_P14464	ref|Homo sapiens WAP four-disulfide core domain 2 (WFDC2), mRNA [NM_006103]	0.000106916	0.0127701	451.342	-2.66397	3.22371e-05	0.00540856	300.585	-2.74837	-2.70617
NM_024705	DHRS12	A_23_P205200	ref|Homo sapiens dehydrogenase/reductase (SDR family) member 12 (DHRS12), transcript variant 2, mRNA [NM_024705]	0.000110163	0.0129076	455.488	-2.65949	3.22371e-05	0.00540856	300.037	-2.74896	-2.70423
NM_033111	N4BP2L2	A_23_P65262	ref|Homo sapiens NEDD4 binding protein 2-like 2 (N4BP2L2), transcript variant 1, mRNA [NM_033111]	0.000168143	0.0168213	532.917	-2.56728	2.52795e-05	0.0047807	274.539	-2.83648	-2.70188
NM_024060	AHNAK	A_23_P21363	ref|Homo sapiens AHNAK nucleoprotein (AHNAK), transcript variant 2, mRNA [NM_024060]	8.85941e-05	0.0117178	417.277	-2.68905	3.2701e-05	0.00546512	301.829	-2.71414	-2.70159
NM_023944	CYP4F12	A_23_P108280	ref|Homo sapiens cytochrome P450, family 4, subfamily F, polypeptide 12 (CYP4F12), mRNA [NM_023944]	9.99583e-05	0.0122443	443.178	-2.69072	3.73394e-05	0.00585455	316.817	-2.70712	-2.69892
NM_019601	SUSD2	A_23_P314101	ref|Homo sapiens sushi domain containing 2 (SUSD2), mRNA [NM_019601]	1.92495e-05	0.00441489	260.538	-3.14117	0.000205019	0.0186498	576.844	-2.25593	-2.69855
NM_080593	HIST1H2BK	A_23_P145238	ref|Homo sapiens histone cluster 1, H2bk (HIST1H2BK), mRNA [NM_080593]	0.000138457	0.0150378	492.188	-2.59809	2.41199e-05	0.00464286	270.223	-2.797	-2.69755
NM_001018108	SERF2	A_24_P313334	ref|Homo sapiens small EDRK-rich factor 2 (SERF2), mRNA [NM_001018108]	7.42149e-05	0.0107023	395.466	-2.79125	5.12547e-05	0.00726974	356.322	-2.59593	-2.69359
NM_001143962	CAPN8	A_23_P94782	ref|Homo sapiens calpain 8 (CAPN8), mRNA [NM_001143962]	2.24964e-05	0.00487437	271.658	-3.08864	0.000188784	0.017581	559.128	-2.2954	-2.69202
NM_080284	ABCA6	A_23_P500400	ref|Homo sapiens ATP-binding cassette, sub-family A (ABC1), member 6 (ABCA6), mRNA [NM_080284]	3.80352e-05	0.00694915	321.633	-2.91553	0.000111322	0.0118227	463.068	-2.46472	-2.69013
NM_207627	ABCG1	A_23_P166297	ref|Homo sapiens ATP-binding cassette, sub-family G (WHITE), member 1 (ABCG1), transcript variant 5, mRNA [NM_207627]	0.000126397	0.0141558	476.494	-2.64287	3.47883e-05	0.00561798	309.485	-2.73359	-2.68823
NM_015124	GRAMD4	A_24_P23258	ref|Homo sapiens GRAM domain containing 4 (GRAMD4), mRNA [NM_015124]	0.000196902	0.0190359	560.469	-2.48805	2.27283e-05	0.00449541	261.986	-2.86751	-2.67778
NM_017644	KLHL24	A_24_P521994	ref|Homo sapiens kelch-like 24 (Drosophila) (KLHL24), mRNA [NM_017644]	8.3028e-05	0.0111875	411.641	-2.7493	5.35739e-05	0.00728707	364.293	-2.5991	-2.6742
NM_001164380	STAU2	A_24_P374634	ref|Homo sapiens staufen, RNA binding protein, homolog 2 (Drosophila) (STAU2), transcript variant 1, mRNA [NM_001164380]	3.36286e-05	0.00641593	307.307	-2.96065	0.000136834	0.0137209	497.488	-2.36392	-2.66229
NM_032932	RAB11FIP4	A_23_P38427	ref|Homo sapiens RAB11 family interacting protein 4 (class II) (RAB11FIP4), mRNA [NM_032932]	0.000134283	0.0148082	486.708	-2.59806	3.20052e-05	0.00547619	299.144	-2.71993	-2.659
NM_001098516	MUC20	A_33_P3226775	ref|Homo sapiens mucin 20, cell surface associated (MUC20), transcript variant S, mRNA [NM_001098516]	8.62749e-05	0.011517	414.902	-2.74904	8.48833e-05	0.01	421.922	-2.56723	-2.65813
NM_001099220	ZNF862	A_24_P333421	ref|Homo sapiens zinc finger protein 862 (ZNF862), mRNA [NM_001099220]	8.3028e-05	0.0111875	411.77	-2.74259	5.26462e-05	0.00720635	361.4	-2.57136	-2.65698
ENST00000374976	ENST00000374976	A_24_P857624	ens|Putative uncharacterized protein [Source:UniProtKB/TrEMBL;Acc:Q6YL35] [ENST00000374976]	7.93172e-05	0.0111401	402.939	-2.7857	7.76938e-05	0.00933148	409.696	-2.51596	-2.65083
NM_000901	NR3C2	A_23_P392470	ref|Homo sapiens nuclear receptor subfamily 3, group C, member 2 (NR3C2), transcript variant 1, mRNA [NM_000901]	1.34515e-05	0.00351515	237.748	-3.24232	0.000607171	0.0373466	856.553	-2.04492	-2.64362
NM_145316	TMEM217	A_23_P334870	ref|Homo sapiens transmembrane protein 217 (TMEM217), transcript variant 1, mRNA [NM_145316]	8.65068e-05	0.0114769	415.433	-2.75011	7.05042e-05	0.00886297	394.198	-2.52909	-2.6396
NM_012193	FZD4	A_23_P64617	ref|Homo sapiens frizzled homolog 4 (Drosophila) (FZD4), mRNA [NM_012193]	7.60703e-05	0.0108251	397.971	-2.73637	5.9372e-05	0.00795031	373.258	-2.54153	-2.63895
NM_001042483	NUPR1	A_24_P270728	ref|Homo sapiens nuclear protein, transcriptional regulator, 1 (NUPR1), transcript variant 1, mRNA [NM_001042483]	1.15961e-05	0.00328947	222.084	-3.28136	0.000938355	0.0479384	1015.82	-1.98467	-2.63301
NM_001030005	CPLX3	A_23_P117851	ref|Homo sapiens complexin 3 (CPLX3), mRNA [NM_001030005]	3.89628e-05	0.00697095	325.03	-2.95616	0.000209657	0.0187942	582.32	-2.30968	-2.63292
NM_173627	ENDOV	A_24_P361457	ref|Homo sapiens hypothetical protein FLJ35220 (FLJ35220), transcript variant 1, mRNA [NM_173627]	8.3028e-05	0.0111875	411.492	-2.73584	8.85941e-05	0.0101867	429.376	-2.51235	-2.6241
NM_016619	PLAC8	A_24_P183128	ref|Homo sapiens placenta-specific 8 (PLAC8), transcript variant 2, mRNA [NM_016619]	8.8826e-05	0.0117125	419.081	-2.72412	7.30553e-05	0.00905172	398.985	-2.51312	-2.61862
NM_001076680	C17ORF108	A_23_P392126	ref|Homo sapiens chromosome 17 open reading frame 108 (C17orf108), mRNA [NM_001076680]	0.000432998	0.0321897	749.865	-2.2751	1.71622e-05	0.00381443	235.266	-2.95627	-2.61569
NM_002374	MAP2	A_33_P3214665	ref|Homo sapiens microtubule-associated protein 2 (MAP2), transcript variant 1, mRNA [NM_002374]	7.83895e-05	0.0110458	401.741	-2.77558	9.13771e-05	0.0102872	435.467	-2.43875	-2.60716
NM_001143819	TPCN1	A_23_P218086	ref|Homo sapiens two pore segment channel 1 (TPCN1), transcript variant 1, mRNA [NM_001143819]	0.000816596	0.0481011	951.639	-2.14841	1.09003e-05	0.00271676	208.938	-3.04108	-2.59474
NM_001100913	PACS2	A_24_P393372	ref|Homo sapiens phosphofurin acidic cluster sorting protein 2 (PACS2), transcript variant 1, mRNA [NM_001100913]	4.17459e-05	0.00731707	332.485	-2.93435	0.000215223	0.019134	588.006	-2.25034	-2.59234
NM_002612	PDK4	A_24_P243749	ref|Homo sapiens pyruvate dehydrogenase kinase, isozyme 4 (PDK4), mRNA [NM_002612]	0.000369219	0.0287365	710.276	-2.32147	2.18006e-05	0.00437209	257.836	-2.8628	-2.59213
NM_020422	TMEM159	A_23_P406131	ref|Homo sapiens transmembrane protein 159 (TMEM159), mRNA [NM_020422]	0.000169071	0.016836	534.371	-2.537	4.52247e-05	0.00663265	337.947	-2.64219	-2.58959
NM_175861	TMTC1	A_32_P2452	ref|Homo sapiens transmembrane and tetratricopeptide repeat containing 1 (TMTC1), mRNA [NM_175861]	8.09407e-05	0.0111859	405.212	-2.74314	0.00010135	0.0110914	448.985	-2.43585	-2.58949
NM_198686	RAB15	A_24_P193295	ref|Homo sapiens RAB15, member RAS onocogene family (RAB15), mRNA [NM_198686]	0.000426504	0.0319271	744.933	-2.30006	2.04091e-05	0.00419048	251.416	-2.87258	-2.58632
ENST00000369159	HIST2H2AA4	A_33_P3253214	ens|Histone H2A type 2-A (H2A.2)(H2A/o) [Source:UniProtKB/Swiss-Prot;Acc:Q6FI13] [ENST00000369159]	0.000196438	0.0190337	559.86	-2.50468	4.05863e-05	0.00609756	326.79	-2.66773	-2.58621
NM_203377	MB	A_33_P3303649	ref|Homo sapiens myoglobin (MB), transcript variant 2, mRNA [NM_203377]	6.09954e-05	0.0096337	371.709	-2.8516	0.000233081	0.0199801	604.661	-2.30408	-2.57784
NM_001030001	RPS29	A_33_P3282840	ref|Homo sapiens ribosomal protein S29 (RPS29), transcript variant 2, mRNA [NM_001030001]	0.000160026	0.0163121	523.986	-2.52101	4.56886e-05	0.006633	340.411	-2.63129	-2.57615
NM_003064	SLPI	A_24_P190472	ref|Homo sapiens secretory leukocyte peptidase inhibitor (SLPI), mRNA [NM_003064]	0.000200148	0.0192205	564.425	-2.51434	4.7312e-05	0.00677741	348.002	-2.62663	-2.57048
CR591045	BST2	A_33_P3220911	gb|full-length cDNA clone CS0DL006YF17 of B cells (Ramos cell line) Cot 25-normalized of Homo sapiens (human). [CR591045]	0.000228211	0.0208475	591.93	-2.44646	4.03544e-05	0.00608392	325.582	-2.69226	-2.56936
NM_015982	YBX2	A_23_P49865	ref|Homo sapiens Y box binding protein 2 (YBX2), mRNA [NM_015982]	3.5484e-05	0.00662338	314.409	-2.94165	0.000288279	0.0232336	651.061	-2.18847	-2.56506
NM_003641	IFITM1	A_33_P3423941	ref|Homo sapiens interferon induced transmembrane protein 1 (9-27) (IFITM1), mRNA [NM_003641]	0.000109003	0.0128767	454.21	-2.6168	7.37511e-05	0.00905983	401.231	-2.51298	-2.56489
NM_000507	FBP1	A_23_P257111	ref|Homo sapiens fructose-1,6-bisphosphatase 1 (FBP1), transcript variant 1, mRNA [NM_000507]	4.40651e-05	0.00753968	339.156	-2.90537	0.000338606	0.0259325	690.499	-2.21928	-2.56232
NR_026954	LOC90246	A_24_P532180	ref|Homo sapiens hypothetical protein LOC90246 (LOC90246), non-coding RNA [NR_026954]	8.16364e-05	0.0112102	408.643	-2.75343	0.000133587	0.0134895	493.446	-2.36922	-2.56132
NM_014935	PLEKHA6	A_23_P431268	ref|Homo sapiens pleckstrin homology domain containing, family A member 6 (PLEKHA6), mRNA [NM_014935]	0.000248388	0.0216364	612.772	-2.43361	3.89628e-05	0.00606498	319.737	-2.66677	-2.55019
NM_006074	TRIM22	A_24_P172481	ref|Homo sapiens tripartite motif-containing 22 (TRIM22), mRNA [NM_006074]	0.00020757	0.0195415	575.219	-2.49357	5.12547e-05	0.00726974	355.752	-2.60517	-2.54937
NM_003099	SNX1	A_33_P3268716	ref|Homo sapiens sorting nexin 1 (SNX1), transcript variant 1, mRNA [NM_003099]	0.00018948	0.0185261	553.818	-2.50819	5.12547e-05	0.00726974	355.887	-2.58797	-2.54808
NM_173653	SLC9A9	A_32_P46214	ref|Homo sapiens solute carrier family 9 (sodium/hydrogen exchanger), member 9 (SLC9A9), mRNA [NM_173653]	0.000470569	0.0339298	775.65	-2.25233	2.48156e-05	0.00475556	273.553	-2.84128	-2.5468
NM_001005862	ERBB2	A_23_P89249	ref|Homo sapiens v-erb-b2 erythroblastic leukemia viral oncogene homolog 2, neuro/glioblastoma derived oncogene homolog (avian) (ERBB2), transcript variant 2, mRNA [NM_001005862]	0.000373858	0.0289928	712.609	-2.31103	3.08456e-05	0.0054065	290.685	-2.75828	-2.53466
NM_006287	TFPI	A_33_P3212615	ref|Homo sapiens tissue factor pathway inhibitor (lipoprotein-associated coagulation inhibitor) (TFPI), transcript variant 1, mRNA [NM_006287]	0.000234705	0.0209524	599.613	-2.42845	4.52247e-05	0.00663265	337.932	-2.63964	-2.53405
NM_001823	CKB	A_23_P25674	ref|Homo sapiens creatine kinase, brain (CKB), mRNA [NM_001823]	0.000142168	0.0150614	499.245	-2.59478	8.85941e-05	0.0101867	429.42	-2.47048	-2.53263
NM_183233	SLC22A18	A_23_P139260	ref|Homo sapiens solute carrier family 22, member 18 (SLC22A18), transcript variant 2, mRNA [NM_183233]	0.000465467	0.0336745	773.042	-2.25645	2.48156e-05	0.00475556	272.737	-2.80779	-2.53212
NM_138621	BCL2L11	A_24_P122921	ref|Homo sapiens BCL2-like 11 (apoptosis facilitator) (BCL2L11), transcript variant 1, mRNA [NM_138621]	0.000269029	0.0229249	631.076	-2.42511	4.52247e-05	0.00663265	338.062	-2.63288	-2.529
NM_017422	CALML5	A_33_P3339865	ref|Homo sapiens calmodulin-like 5 (CALML5), mRNA [NM_017422]	0.00012918	0.0144301	480.435	-2.62646	0.000105524	0.0114899	454.636	-2.42647	-2.52646
NM_031477	YPEL3	A_23_P15108	ref|Homo sapiens yippee-like 3 (Drosophila) (YPEL3), transcript variant 1, mRNA [NM_031477]	0.000545248	0.0372583	815.559	-2.23565	2.59752e-05	0.00480687	278.49	-2.80756	-2.5216
NM_000282	PCCA	A_23_P48358	ref|Homo sapiens propionyl Coenzyme A carboxylase, alpha polypeptide (PCCA), nuclear gene encoding mitochondrial protein, transcript variant 1, mRNA [NM_000282]	0.000144719	0.0152195	502.381	-2.55681	8.21003e-05	0.00969863	414.574	-2.469	-2.51291
NM_024897	PAQR6	A_23_P97283	ref|Homo sapiens progestin and adipoQ receptor family member VI (PAQR6), transcript variant 1, mRNA [NM_024897]	0.000203627	0.0193392	570.21	-2.4956	6.63296e-05	0.00858859	385.425	-2.52933	-2.51247
NM_001003395	TPD52L1	A_23_P31143	ref|Homo sapiens tumor protein D52-like 1 (TPD52L1), transcript variant 2, mRNA [NM_001003395]	0.000309847	0.025351	666.223	-2.36564	4.56886e-05	0.006633	340.543	-2.64865	-2.50715
NM_012153	EHF	A_23_P203540	ref|Homo sapiens ets homologous factor (EHF), mRNA [NM_012153]	0.000353913	0.0279487	697.876	-2.32487	4.31374e-05	0.00634812	334.056	-2.66983	-2.49735
NM_000691	ALDH3A1	A_23_P207213	ref|Homo sapiens aldehyde dehydrogenase 3 family, memberA1 (ALDH3A1), transcript variant 2, mRNA [NM_000691]	0.000188552	0.0184773	552.841	-2.52883	0.000117584	0.0122169	471.887	-2.44863	-2.48873
NM_006006	ZBTB16	A_23_P104804	ref|Homo sapiens zinc finger and BTB domain containing 16 (ZBTB16), transcript variant 1, mRNA [NM_006006]	0.000164433	0.0166042	528.889	-2.55032	0.00010622	0.0114787	456.866	-2.42566	-2.48799
NM_001159642	BNIPL	A_33_P3400708	ref|Homo sapiens BCL2/adenovirus E1B 19kD interacting protein like (BNIPL), transcript variant 2, mRNA [NM_001159642]	0.000494689	0.0350246	788.645	-2.28594	4.10501e-05	0.00614583	327.539	-2.68524	-2.48559
NM_001136022	NFATC4	A_33_P3250083	ref|Homo sapiens nuclear factor of activated T-cells, cytoplasmic, calcineurin-dependent 4 (NFATC4), transcript variant 1, mRNA [NM_001136022]	0.000161649	0.0164	526.285	-2.57055	0.000141936	0.0140046	505.383	-2.38753	-2.47904
NM_007253	CYP4F8	A_23_P131060	ref|Homo sapiens cytochrome P450, family 4, subfamily F, polypeptide 8 (CYP4F8), mRNA [NM_007253]	0.000240039	0.0211224	605.031	-2.44348	7.14319e-05	0.00890173	395.837	-2.50869	-2.47608
NM_032649	CNDP1	A_23_P9869	ref|Homo sapiens carnosine dipeptidase 1 (metallopeptidase M20 family) (CNDP1), mRNA [NM_032649]	7.67661e-05	0.0108882	399.174	-2.7579	0.000352753	0.0264983	701.187	-2.18802	-2.47296
NM_001136106	BEAN	A_33_P3260066	ref|Homo sapiens brain expressed, associated with Nedd4 (BEAN), mRNA [NM_001136106]	9.23048e-05	0.011952	424.657	-2.66211	0.000223804	0.0194556	595.61	-2.27853	-2.47032
NM_025176	NINL	A_23_P143374	ref|Homo sapiens ninein-like (NINL), mRNA [NM_025176]	0.00012431	0.0141425	473.349	-2.6533	0.000205483	0.0186526	577.191	-2.27227	-2.46278
NM_002064	GLRX	A_23_P69908	ref|Homo sapiens glutaredoxin (thioltransferase) (GLRX), transcript variant 1, mRNA [NM_002064]	0.000461292	0.0334286	771.239	-2.26986	4.22098e-05	0.0062543	330.702	-2.65461	-2.46224
NM_206927	SYTL2	A_23_P53193	ref|Homo sapiens synaptotagmin-like 2 (SYTL2), transcript variant c, mRNA [NM_206927]	0.000332112	0.0268165	682.233	-2.386	7.58384e-05	0.00926346	404.375	-2.533	-2.4595
NM_005252	FOS	A_23_P106194	ref|Homo sapiens FBJ murine osteosarcoma viral oncogene homolog (FOS), mRNA [NM_005252]	0.000869011	0.0493676	976.162	-2.11044	2.55114e-05	0.00476191	277.528	-2.79976	-2.4551
NM_013974	DDAH2	A_23_P19482	ref|Homo sapiens dimethylarginine dimethylaminohydrolase 2 (DDAH2), mRNA [NM_013974]	0.000173477	0.017235	537.403	-2.53246	0.000127093	0.0130166	486.13	-2.3678	-2.45013
NM_020248	CTNNBIP1	A_23_P23584	ref|Homo sapiens catenin, beta interacting protein 1 (CTNNBIP1), transcript variant 1, mRNA [NM_020248]	0.000126397	0.0141558	476.455	-2.57214	0.000163041	0.015657	530.928	-2.3143	-2.44322
NM_002012	FHIT	A_33_P3216601	ref|Homo sapiens fragile histidine triad gene (FHIT), transcript variant 1, mRNA [NM_002012]	0.000111786	0.0130623	457.356	-2.63842	0.00021847	0.0192245	591.187	-2.24647	-2.44244
NM_004120	GBP2	A_23_P85693	ref|Homo sapiens guanylate binding protein 2, interferon-inducible (GBP2), mRNA [NM_004120]	0.000363189	0.0283183	705.828	-2.36363	8.55791e-05	0.0100545	422.862	-2.50464	-2.43413
NM_014636	RALGPS1	A_23_P390148	ref|Homo sapiens Ral GEF with PH domain and SH3 binding motif 1 (RALGPS1), mRNA [NM_014636]	0.000428591	0.0320277	746.485	-2.31659	9.27687e-05	0.0103627	436.881	-2.54208	-2.42934
NM_012445	SPON2	A_23_P121533	ref|Homo sapiens spondin 2, extracellular matrix protein (SPON2), transcript variant 1, mRNA [NM_012445]	0.000229602	0.0208421	594.265	-2.44774	0.000108076	0.011592	459.045	-2.4098	-2.42877
NM_024103	SLC25A23	A_32_P224522	ref|Homo sapiens solute carrier family 25 (mitochondrial carrier; phosphate carrier), member 23 (SLC25A23), nuclear gene encoding mitochondrial protein, mRNA [NM_024103]	0.000211281	0.0197186	577.729	-2.46924	0.000123614	0.0127818	478.783	-2.38245	-2.42585
NM_031412	GABARAPL1	A_33_P3812669	ref|Homo sapiens GABA(A) receptor-associated protein like 1 (GABARAPL1), mRNA [NM_031412]	0.000586066	0.0389969	837.237	-2.25579	5.26462e-05	0.00720635	362.637	-2.59224	-2.42402
NR_026953	LOC90110	A_33_P3333587	ref|Homo sapiens hypothetical protein LOC90110 (LOC90110), non-coding RNA [NR_026953]	0.000278538	0.023549	639.143	-2.4032	9.11452e-05	0.0103421	434.99	-2.44247	-2.42284
BX649145	LOC157562	A_33_P3685572	gb|Homo sapiens mRNA; cDNA DKFZp686N0244 (from clone DKFZp686N0244). [BX649145]	0.000146111	0.0153285	503.725	-2.57487	0.000200612	0.0183652	571.855	-2.26744	-2.42115
NM_016423	ZNF219	A_24_P35891	ref|Homo sapiens zinc finger protein 219 (ZNF219), transcript variant 1, mRNA [NM_016423]	0.000136602	0.0149114	489.823	-2.60056	0.000224964	0.0194779	597.199	-2.23709	-2.41882
ENST00000372234	ANXA11	A_32_P150632	ens|Annexin A11 (Annexin-11)(Annexin XI)(Calcyclin-associated annexin 50)(CAP-50)(56 kDa autoantigen) [Source:UniProtKB/Swiss-Prot;Acc:P50995] [ENST00000372234]	0.000148198	0.0154348	507.177	-2.56804	0.000189944	0.0176509	562.316	-2.26859	-2.41831
NM_173537	GTF2IRD2	A_23_P59616	ref|Homo sapiens GTF2I repeat domain containing 2 (GTF2IRD2), mRNA [NM_173537]	0.000353217	0.027945	697.015	-2.32619	8.67387e-05	0.0101355	424.997	-2.50717	-2.41668
NM_001035254	FAM102A	A_23_P112531	ref|Homo sapiens family with sequence similarity 102, member A (FAM102A), transcript variant 1, mRNA [NM_001035254]	0.000118048	0.0137197	463.593	-2.65592	0.000324922	0.0254727	678.905	-2.16049	-2.40821
NM_001013732	PTCHD4	A_33_P3265494	ref|Homo sapiens chromosome 6 open reading frame 138 (C6orf138), mRNA [NM_001013732]	0.000154924	0.0159427	517.863	-2.53486	0.000250244	0.0209109	619.305	-2.27702	-2.40594
NM_052867	NALCN	A_33_P3230166	ref|Homo sapiens sodium leak channel, non-selective (NALCN), mRNA [NM_052867]	0.000287351	0.0239652	647.222	-2.38365	0.000113874	0.0119756	467.421	-2.41084	-2.39724
NM_001040716	PC	A_33_P3244347	ref|Homo sapiens pyruvate carboxylase (PC), nuclear gene encoding mitochondrial protein, transcript variant 3, mRNA [NM_001040716]	0.000578645	0.0387422	833.686	-2.21147	5.26462e-05	0.00720635	362.684	-2.57232	-2.39189
NM_198582	KLHL30	A_33_P3243702	ref|Homo sapiens kelch-like 30 (Drosophila) (KLHL30), mRNA [NM_198582]	8.95218e-05	0.011697	421.439	-2.71737	0.000631291	0.0381232	871.409	-2.04959	-2.38348
NM_003881	WISP2	A_23_P102611	ref|Homo sapiens WNT1 inducible signaling pathway protein 2 (WISP2), mRNA [NM_003881]	0.00038383	0.0295009	718.492	-2.30512	8.72026e-05	0.0101348	425.674	-2.45946	-2.38229
NR_024480	LOC100131551	A_33_P3306654	ref|Homo sapiens hypothetical LOC100131551 (LOC100131551), non-coding RNA [NR_024480]	0.000617376	0.0404559	854.495	-2.19565	6.86488e-05	0.0087574	388.954	-2.56737	-2.38151
NM_024108	TRAPPC6A	A_24_P390928	ref|Homo sapiens trafficking protein particle complex 6A (TRAPPC6A), mRNA [NM_024108]	0.000193423	0.0187838	557.363	-2.51034	0.000217543	0.0192213	590.333	-2.24802	-2.37918
NM_181507	HPS5	A_23_P98631	ref|Homo sapiens Hermansky-Pudlak syndrome 5 (HPS5), transcript variant 1, mRNA [NM_181507]	0.000217311	0.0201073	583.37	-2.47772	0.000192959	0.0178925	564.928	-2.27982	-2.37877
NM_003621	PPFIBP2	A_23_P409623	ref|Homo sapiens PTPRF interacting protein, binding protein 2 (liprin beta 2) (PPFIBP2), mRNA [NM_003621]	0.000108307	0.0128297	453.539	-2.64518	0.000452015	0.0310845	764.293	-2.10997	-2.37758
NM_198580	SLC27A1	A_24_P382489	ref|Homo sapiens solute carrier family 27 (fatty acid transporter), member 1 (SLC27A1), mRNA [NM_198580]	0.000851153	0.0488032	969.344	-2.13972	4.7312e-05	0.00677741	348.85	-2.609	-2.37436
NM_080607	VSTM2L	A_23_P79803	ref|Homo sapiens V-set and transmembrane domain containing 2 like (VSTM2L), mRNA [NM_080607]	0.000121991	0.0139153	469.939	-2.65124	0.000514866	0.0334842	805.008	-2.07595	-2.3636
NM_001103175	CCDC64B	A_33_P3335590	ref|Homo sapiens coiled-coil domain containing 64B (CCDC64B), mRNA [NM_001103175]	0.000397514	0.0303363	726.45	-2.31628	0.000113642	0.0119804	466.089	-2.40726	-2.36177
NM_152772	TCP11L2	A_23_P419107	ref|Homo sapiens t-complex 11 (mouse)-like 2 (TCP11L2), mRNA [NM_152772]	0.000121295	0.0139096	468.909	-2.63351	0.000504894	0.0329849	798.35	-2.08572	-2.35961
NM_012142	CCNDBP1	A_33_P3392977	ref|Homo sapiens cyclin D-type binding-protein 1 (CCNDBP1), transcript variant 1, mRNA [NM_012142]	0.000491674	0.0349259	786.736	-2.25046	8.62749e-05	0.0101087	424.131	-2.46347	-2.35697
NM_003831	RIOK3	A_33_P3317850	ref|Homo sapiens RIO kinase 3 (yeast) (RIOK3), mRNA [NM_003831]	0.000729626	0.0450072	909.544	-2.18308	7.00404e-05	0.00885631	391.925	-2.5224	-2.35274
NM_017682	BEST2	A_23_P16225	ref|Homo sapiens bestrophin 2 (BEST2), mRNA [NM_017682]	8.18684e-05	0.0112063	409.44	-2.73728	0.000930934	0.0476722	1013	-1.96635	-2.35182
NM_014631	SH3PXD2A	A_23_P35456	ref|Homo sapiens SH3 and PX domains 2A (SH3PXD2A), mRNA [NM_014631]	0.00058166	0.0387635	834.807	-2.21602	8.14045e-05	0.00969613	413.238	-2.48262	-2.34932
NM_006536	CLCA2	A_23_P397248	ref|Homo sapiens chloride channel accessory 2 (CLCA2), mRNA [NM_006536]	0.000786215	0.0469529	936.884	-2.14635	7.93172e-05	0.00947368	411.836	-2.54869	-2.34752
NM_001039360	ZBTB7C	A_33_P3402304	ref|Homo sapiens zinc finger and BTB domain containing 7C (ZBTB7C), mRNA [NM_001039360]	9.81029e-05	0.0121552	437.433	-2.64369	0.000623869	0.0379408	867.006	-2.03589	-2.33979
NM_005589	ALDH6A1	A_23_P128967	ref|Homo sapiens aldehyde dehydrogenase 6 family, member A1 (ALDH6A1), nuclear gene encoding mitochondrial protein, mRNA [NM_005589]	0.00051417	0.0359903	799.696	-2.2418	0.000102046	0.0111392	451.186	-2.42837	-2.33509
NR_026850	MTMR9L	A_24_P160413	ref|Homo sapiens myotubularin related protein 9-like (MTMR9L), non-coding RNA [NR_026850]	0.000792476	0.0471961	939.589	-2.16004	7.0968e-05	0.00889535	395.136	-2.50596	-2.333
NM_004605	SULT2B1	A_23_P107981	ref|Homo sapiens sulfotransferase family, cytosolic, 2B, member 1 (SULT2B1), transcript variant 1, mRNA [NM_004605]	0.000279002	0.0234961	639.686	-2.3797	0.000184842	0.0173261	554.311	-2.27995	-2.32983
ENST00000372387	ENST00000372387	A_33_P3267203	ens|cDNA FLJ43696 fis, clone TBAES2007964 [Source:UniProtKB/TrEMBL;Acc:Q6ZUH9] [ENST00000372387]	0.000121527	0.0138992	469.358	-2.63723	0.000729394	0.0412189	919.394	-2.00684	-2.32203
NM_014214	IMPA2	A_33_P3290403	ref|Homo sapiens inositol(myo)-1(or 4)-monophosphatase 2 (IMPA2), mRNA [NM_014214]	0.000660745	0.042586	877.115	-2.19021	9.53198e-05	0.0105385	440.407	-2.44946	-2.31983
NM_177457	LYNX1	A_23_P111981	ref|Homo sapiens Ly6/neurotoxin 1 (LYNX1), transcript variant 3, mRNA [NM_177457]	0.000330488	0.0267355	681.469	-2.36725	0.000197365	0.0181838	568.566	-2.26772	-2.31749
NM_001163724	SMIM1	A_33_P3394868	ref|Homo sapiens hypothetical protein LOC388588 (LOC388588), mRNA [NM_001163724]	0.000396818	0.0303369	726.008	-2.31502	0.000161186	0.0155481	527.377	-2.31802	-2.31652
NM_001130518	CSGALNACT1	A_33_P3366540	ref|Homo sapiens chondroitin sulfate N-acetylgalactosaminyltransferase 1 (CSGALNACT1), transcript variant 1, mRNA [NM_001130518]	0.000132891	0.0147301	484.616	-2.55432	0.000550814	0.0351852	827.231	-2.06495	-2.30964
NM_006472	TXNIP	A_23_P97700	ref|Homo sapiens thioredoxin interacting protein (TXNIP), mRNA [NM_006472]	0.000859734	0.0490344	972.287	-2.15233	9.11452e-05	0.0103421	434.98	-2.46187	-2.3071
NM_022783	DEPDC6	A_23_P60166	ref|Homo sapiens DEP domain containing 6 (DEPDC6), mRNA [NM_022783]	0.00012547	0.0141253	475.538	-2.62835	0.000868779	0.0455718	985.274	-1.98059	-2.30447
NM_001017424	KCNK2	A_33_P3213822	ref|Homo sapiens potassium channel, subfamily K, member 2 (KCNK2), transcript variant 1, mRNA [NM_001017424]	0.000429055	0.0320069	746.585	-2.27301	0.000153996	0.014955	519.714	-2.32923	-2.30112
NM_212559	XKRX	A_32_P416161	ref|Homo sapiens XK, Kell blood group complex subunit-related, X-linked (XKRX), mRNA [NM_212559]	0.000156779	0.0160952	519.383	-2.55274	0.000660513	0.0390137	884.113	-2.03022	-2.29148
NM_001353	AKR1C1	A_23_P257971	ref|Homo sapiens aldo-keto reductase family 1, member C1 (dihydrodiol dehydrogenase 1; 20-alpha (3-alpha)-hydroxysteroid dehydrogenase) (AKR1C1), mRNA [NM_001353]	0.000250244	0.021754	614.424	-2.42844	0.000337446	0.0259358	689.752	-2.15367	-2.29106
NM_001123225	SYCE3	A_33_P3250887	ref|Homo sapiens chromosome 22 open reading frame 41 (C22orf41), mRNA [NM_001123225]	0.000272276	0.0231558	633.866	-2.41179	0.000356232	0.0266205	702.888	-2.16759	-2.28969
NM_005870	SAP18	A_24_P381555	ref|Homo sapiens Sin3A-associated protein, 18kDa (SAP18), mRNA [NM_005870]	0.000242358	0.0212831	607.003	-2.42805	0.000333271	0.0257989	686.113	-2.14891	-2.28848
NM_006634	VAMP5	A_23_P39840	ref|Homo sapiens vesicle-associated membrane protein 5 (myobrevin) (VAMP5), mRNA [NM_006634]	0.000333271	0.0268097	683.604	-2.3603	0.000260912	0.0215931	627.577	-2.21235	-2.28632
NM_006989	RASA4	A_33_P3287959	ref|Homo sapiens RAS p21 protein activator 4 (RASA4), transcript variant 1, mRNA [NM_006989]	0.000566121	0.0380218	828.177	-2.22121	0.000149358	0.0146364	513.727	-2.34825	-2.28473
NM_015416	LETMD1	A_23_P117037	ref|Homo sapiens LETM1 domain containing 1 (LETMD1), transcript variant 1, mRNA [NM_015416]	0.000660977	0.0425373	877.141	-2.21282	0.000139617	0.0138073	502.04	-2.34657	-2.27969
NM_207397	CD164L2	A_33_P3417437	ref|Homo sapiens CD164 sialomucin-like 2 (CD164L2), mRNA [NM_207397]	0.000228211	0.0208475	592.811	-2.44487	0.00041398	0.0292623	741.928	-2.11316	-2.27902
NM_006647	NOXA1	A_23_P254353	ref|Homo sapiens NADPH oxidase activator 1 (NOXA1), mRNA [NM_006647]	0.000377105	0.0291921	714.422	-2.31859	0.000230066	0.0198004	601.567	-2.23415	-2.27637
NM_014417	BBC3	A_23_P382775	ref|Homo sapiens BCL2 binding component 3 (BBC3), transcript variant 4, mRNA [NM_014417]	0.000182986	0.0180137	547.07	-2.50831	0.000701795	0.0403467	905.705	-2.02587	-2.26709
NM_000076	CDKN1C	A_23_P428129	ref|Homo sapiens cyclin-dependent kinase inhibitor 1C (p57, Kip2) (CDKN1C), transcript variant 1, mRNA [NM_000076]	0.000250939	0.0217269	616.794	-2.43532	0.000479382	0.0321462	781.935	-2.09767	-2.2665
NM_080821	FAM210B	A_23_P68486	ref|Homo sapiens chromosome 20 open reading frame 108 (C20orf108), mRNA [NM_080821]	0.000191799	0.0186682	555.869	-2.49893	0.000635697	0.0381755	873.856	-2.0269	-2.26292
NR_027355	LOC645166	A_32_P217655	ref|Homo sapiens lymphocyte-specific protein 1 pseudogene (LOC645166), transcript variant 2, non-coding RNA [NR_027355]	0.000445985	0.0328157	759.696	-2.29142	0.00023772	0.0201772	608.171	-2.22583	-2.25862
NM_001551	IGBP1	A_23_P171255	ref|Homo sapiens immunoglobulin (CD79A) binding protein 1 (IGBP1), mRNA [NM_001551]	0.000596734	0.0395238	843.389	-2.21609	0.000180899	0.0170678	549.702	-2.28727	-2.25168
NR_024482	CECR4	A_32_P131143	ref|Homo sapiens cat eye syndrome chromosome region, candidate 4 (non-protein coding) (CECR4), transcript variant 2, non-coding RNA [NR_024482]	0.000166752	0.0167209	532.19	-2.53189	0.000913076	0.0471497	1004.09	-1.97051	-2.2512
NM_014950	ZBTB1	A_23_P99693	ref|Homo sapiens zinc finger and BTB domain containing 1 (ZBTB1), transcript variant 2, mRNA [NM_014950]	0.000415836	0.0315114	738.611	-2.30541	0.000284336	0.0230451	648.221	-2.18809	-2.24675
NM_018368	LMBRD1	A_33_P3359115	ref|Homo sapiens LMBR1 domain containing 1 (LMBRD1), mRNA [NM_018368]	0.000515562	0.0360292	800.738	-2.24255	0.000224036	0.0194366	596.676	-2.24132	-2.24194
NM_198969	AES	A_23_P165061	ref|Homo sapiens amino-terminal enhancer of split (AES), transcript variant 1, mRNA [NM_198969]	0.000827265	0.0483989	956.959	-2.13125	0.000137762	0.01375	499.718	-2.34996	-2.2406
NM_018414	ST6GALNAC1	A_23_P54968	ref|Homo sapiens ST6 (alpha-N-acetyl-neuraminyl-2,3-beta-galactosyl-1,3)-N-acetylgalactosaminide alpha-2,6-sialyltransferase 1 (ST6GALNAC1), mRNA [NM_018414]	0.000233313	0.0209148	597.921	-2.43927	0.000655875	0.0388996	882.248	-2.03999	-2.23963
NM_001001850	STX19	A_33_P3269208	ref|Homo sapiens syntaxin 19 (STX19), mRNA [NM_001001850]	0.000702027	0.0444493	895.458	-2.18145	0.000183218	0.0172113	552.401	-2.28806	-2.23476
NM_001093	ACACB	A_33_P3334220	ref|Homo sapiens acetyl-Coenzyme A carboxylase beta (ACACB), mRNA [NM_001093]	0.000518113	0.0360905	801.89	-2.28852	0.000361334	0.0269085	705.562	-2.17986	-2.23419
NM_178033	CYP4X1	A_24_P293530	ref|Homo sapiens cytochrome P450, family 4, subfamily X, polypeptide 1 (CYP4X1), mRNA [NM_178033]	0.000661673	0.0424554	877.855	-2.17913	0.000187393	0.0174892	557.59	-2.27789	-2.22851
ENST00000309178	ENST00000309178	A_24_P126741	Unknown	0.000490514	0.034901	786	-2.2578	0.000274827	0.0224858	641.089	-2.19646	-2.22713
NM_004747	DLG5	A_24_P129632	ref|Homo sapiens discs, large homolog 5 (Drosophila) (DLG5), mRNA [NM_004747]	0.000708753	0.0444186	898.688	-2.182	0.000193655	0.0179185	565.189	-2.26558	-2.22379
NM_001017971	ATP6AP1L	A_24_P807031	ref|Homo sapiens ATPase, H+ transporting, lysosomal accessory protein 1-like (ATP6AP1L), mRNA [NM_001017971]	0.000776242	0.0465508	931.676	-2.1601	0.000182059	0.0171397	550.327	-2.28742	-2.22376
NM_003255	TIMP2	A_33_P3382177	ref|Homo sapiens TIMP metallopeptidase inhibitor 2 (TIMP2), mRNA [NM_003255]	0.00061668	0.0404718	854.24	-2.2331	0.000287815	0.0232397	650.322	-2.19702	-2.21506
NM_001769	CD9	A_23_P76364	ref|Homo sapiens CD9 molecule (CD9), mRNA [NM_001769]	0.000311471	0.0254356	667.636	-2.34073	0.000471961	0.0319969	776.74	-2.08104	-2.21089
NM_018328	MBD5	A_33_P3854030	ref|Homo sapiens methyl-CpG binding domain protein 5 (MBD5), mRNA [NM_018328]	0.000300107	0.0247419	657.324	-2.36017	0.000631987	0.0380587	871.85	-2.04581	-2.20299
NM_005036	PPARA	A_24_P570049	ref|Homo sapiens peroxisome proliferator-activated receptor alpha (PPARA), transcript variant 5, mRNA [NM_005036]	0.000709217	0.0443188	898.94	-2.16201	0.000235169	0.0200395	606.547	-2.24287	-2.20244
NM_139025	ADAMTS13	A_23_P393645	ref|Homo sapiens ADAM metallopeptidase with thrombospondin type 1 motif, 13 (ADAMTS13), transcript variant 1, mRNA [NM_139025]	0.00063964	0.0417247	866.851	-2.19549	0.000279234	0.022717	644.163	-2.20885	-2.20217
NM_001042463	TMEM80	A_23_P332960	ref|Homo sapiens transmembrane protein 80 (TMEM80), transcript variant 2, mRNA [NM_001042463]	0.000246997	0.0216024	610.523	-2.42758	0.000862285	0.0453968	982.91	-1.973	-2.20029
NM_198581	ZC3H6	A_24_P826348	ref|Homo sapiens zinc finger CCCH-type containing 6 (ZC3H6), mRNA [NM_198581]	0.00066863	0.0427745	880.563	-2.18373	0.000264159	0.0217366	630.768	-2.21651	-2.20012
NM_178454	DRAM2	A_24_P268160	ref|Homo sapiens DNA-damage regulated autophagy modulator 2 (DRAM2), mRNA [NM_178454]	0.000603924	0.0397557	848.626	-2.1965	0.000274827	0.0224858	640.923	-2.19901	-2.19775
NM_017949	CUEDC1	A_24_P287974	ref|Homo sapiens CUE domain containing 1 (CUEDC1), mRNA [NM_017949]	0.000640568	0.0417221	867.433	-2.20384	0.000299411	0.0239963	660.261	-2.17337	-2.18861
NM_021120	DLG3	A_24_P945283	ref|Homo sapiens discs, large homolog 3 (Drosophila) (DLG3), transcript variant 1, mRNA [NM_021120]	0.000518113	0.0360905	801.874	-2.2313	0.00034278	0.0261131	693.904	-2.14121	-2.18626
NM_001039577	CCNL2	A_24_P376339	ref|Homo sapiens cyclin L2 (CCNL2), transcript variant 2, mRNA [NM_001039577]	0.000826337	0.0484103	956.748	-2.12706	0.000221021	0.0193306	593.588	-2.23939	-2.18322
NM_182838	SLC35E2	A_24_P113815	ref|Homo sapiens solute carrier family 35, member E2 (SLC35E2), mRNA [NM_182838]	0.000357391	0.0280692	701.321	-2.3183	0.000587458	0.036604	845.578	-2.04522	-2.18176
NM_004776	B4GALT5	A_24_P239731	ref|Homo sapiens UDP-Gal:betaGlcNAc beta 1,4- galactosyltransferase, polypeptide 5 (B4GALT5), mRNA [NM_004776]	0.000599054	0.0395559	845.111	-2.20213	0.000341157	0.0260354	693.172	-2.15346	-2.17779
NM_032726	PLCD4	A_23_P385105	ref|Homo sapiens phospholipase C, delta 4 (PLCD4), mRNA [NM_032726]	0.000752818	0.0459773	919.55	-2.15979	0.000368987	0.0271966	711.741	-2.19296	-2.17638
NM_024608	NEIL1	A_23_P129157	ref|Homo sapiens nei endonuclease VIII-like 1 (E. coli) (NEIL1), mRNA [NM_024608]	0.000548031	0.0373302	816.717	-2.25052	0.000473584	0.0320565	777.672	-2.09884	-2.17468
NM_001982	ERBB3	A_23_P349416	ref|Homo sapiens v-erb-b2 erythroblastic leukemia viral oncogene homolog 3 (avian) (ERBB3), transcript variant 1, mRNA [NM_001982]	0.00056844	0.0381182	828.825	-2.22139	0.00039705	0.0284859	730.495	-2.11667	-2.16903
NM_014603	CDR2L	A_23_P3963	ref|Homo sapiens cerebellar degeneration-related protein 2-like (CDR2L), mRNA [NM_014603]	0.000332344	0.026785	682.579	-2.3656	0.000850689	0.0451169	977.512	-1.96587	-2.16573
NM_017570	OPLAH	A_23_P170186	ref|Homo sapiens 5-oxoprolinase (ATP-hydrolysing) (OPLAH), mRNA [NM_017570]	0.000341389	0.0274115	689.024	-2.34826	0.000861125	0.0454468	982.39	-1.97369	-2.16097
NM_004624	VIPR1	A_24_P105933	ref|Homo sapiens vasoactive intestinal peptide receptor 1 (VIPR1), mRNA [NM_004624]	0.000445058	0.0328034	758.886	-2.28453	0.000682778	0.0398376	895.52	-2.03465	-2.15959
NM_033292	CASP1	A_23_P202978	ref|Homo sapiens caspase 1, apoptosis-related cysteine peptidase (interleukin 1, beta, convertase) (CASP1), transcript variant alpha, mRNA [NM_033292]	0.000765574	0.0461034	927.08	-2.15227	0.000332808	0.0258559	685.252	-2.15957	-2.15592
NM_145175	FAM84A	A_23_P306215	ref|Homo sapiens family with sequence similarity 84, member A (FAM84A), mRNA [NM_145175]	0.000435781	0.0323408	751.735	-2.29312	0.000665847	0.0392213	886.611	-2.01607	-2.1546
NM_012155	EML2	A_23_P101297	ref|Homo sapiens echinoderm microtubule associated protein like 2 (EML2), mRNA [NM_012155]	0.000626421	0.0409863	858.894	-2.18931	0.000390788	0.0282245	726.566	-2.11805	-2.15368
NM_017586	CACFD1	A_33_P3218625	ref|Homo sapiens chromosome 9 open reading frame 7 (C9orf7), transcript variant 1, mRNA [NM_017586]	0.000846746	0.04868	967.31	-2.14171	0.000314254	0.0249081	672.446	-2.15909	-2.1504
NM_001009612	C20ORF202	A_32_P213881	ref|Homo sapiens chromosome 20 open reading frame 202 (C20orf202), mRNA [NM_001009612]	0.000488195	0.0347934	785.423	-2.26685	0.000804304	0.0434586	956.184	-2.01883	-2.14284
ENST00000382123	IFITM10	A_33_P3358601	ens|CD225 family protein FLJ76511 [Source:UniProtKB/Swiss-Prot;Acc:A6NMD0] [ENST00000382123]	0.000380584	0.0294086	716.207	-2.31798	0.00086043	0.0454657	982.198	-1.96573	-2.14186
NM_198706	HSD11B1L	A_23_P141992	ref|Homo sapiens hydroxysteroid (11-beta) dehydrogenase 1-like (HSD11B1L), transcript variant b, mRNA [NM_198706]	0.00053945	0.0369206	812.492	-2.26709	0.000754673	0.0417715	932.37	-1.99767	-2.13238
NM_006820	IFI44L	A_23_P45871	ref|Homo sapiens interferon-induced protein 44-like (IFI44L), mRNA [NM_006820]	0.000411197	0.0312698	736.295	-2.31538	0.000958069	0.0484859	1024.56	-1.94798	-2.13168
NM_012156	EPB41L1	A_24_P185709	ref|Homo sapiens erythrocyte membrane protein band 4.1-like 1 (EPB41L1), transcript variant 1, mRNA [NM_012156]	0.000450392	0.0330835	762.614	-2.27182	0.000917946	0.0472315	1006.55	-1.96359	-2.1177
NM_031938	BCO2	A_33_P3888485	ref|Homo sapiens beta-carotene oxygenase 2 (BCO2), transcript variant 1, mRNA [NM_031938]	0.00047312	0.0339434	776.888	-2.28226	0.000981261	0.0491977	1033.7	-1.95144	-2.11685
NM_174912	FAAH2	A_23_P113471	ref|Homo sapiens fatty acid amide hydrolase 2 (FAAH2), mRNA [NM_174912]	0.000591168	0.0392154	840.477	-2.21048	0.000696693	0.0403221	903.616	-2.01617	-2.11333
NM_001164446	C6ORF132	A_32_P218355	ref|Homo sapiens chromosome 6 open reading frame 132 (C6orf132), mRNA [NM_001164446]	0.000504894	0.0356885	793.984	-2.2618	0.000915627	0.0472249	1005.56	-1.9616	-2.1117
NM_007207	DUSP10	A_24_P182494	ref|Homo sapiens dual specificity phosphatase 10 (DUSP10), transcript variant 1, mRNA [NM_007207]	0.000729626	0.0450072	909.129	-2.20177	0.000765342	0.0420382	939.09	-2.00624	-2.104
NM_182663	RASSF5	A_24_P171268	ref|Homo sapiens Ras association (RalGDS/AF-6) domain family member 5 (RASSF5), transcript variant 1, mRNA [NM_182663]	0.000485412	0.0346523	783.956	-2.25384	0.00097152	0.0488798	1030.78	-1.95379	-2.10381
NM_007112	THBS3	A_23_P201047	ref|Homo sapiens thrombospondin 3 (THBS3), mRNA [NM_007112]	0.000836774	0.0486253	961.551	-2.15969	0.000606707	0.0373714	856.201	-2.04019	-2.09994
NM_017878	HRASLS2	A_23_P105012	ref|Homo sapiens HRAS-like suppressor 2 (HRASLS2), mRNA [NM_017878]	0.000725219	0.0449282	907.593	-2.17838	0.000690895	0.0401482	899.632	-2.01106	-2.09472
NM_203330	CD59	A_24_P784765	ref|Homo sapiens CD59 molecule, complement regulatory protein (CD59), transcript variant 1, mRNA [NM_203330]	0.000837237	0.0485868	961.858	-2.1417	0.000625493	0.0379325	867.769	-2.03745	-2.08958
NM_001032278	MMP28	A_24_P196592	ref|Homo sapiens matrix metallopeptidase 28 (MMP28), transcript variant 3, mRNA [NM_001032278]	0.000659585	0.0425749	876.887	-2.18367	0.000817756	0.04402	963.917	-1.98789	-2.08578
NR_024416	FLJ35390	A_33_P3343467	ref|Homo sapiens hypothetical LOC255031 (FLJ35390), transcript variant 1, non-coding RNA [NR_024416]	0.000549191	0.0372913	817.435	-2.22127	0.000982652	0.0492102	1034.39	-1.94728	-2.08428
NM_001014440	ODF3B	A_33_P3417695	ref|Homo sapiens outer dense fiber of sperm tails 3B (ODF3B), mRNA [NM_001014440]	0.000754209	0.0459322	921.042	-2.15785	0.000727538	0.041168	918.275	-2.00468	-2.08126
NM_000211	ITGB2	A_23_P329573	ref|Homo sapiens integrin, beta 2 (complement component 3 receptor 3 and 4 subunit) (ITGB2), transcript variant 1, mRNA [NM_000211]	0.000800362	0.0476	943.896	-2.147	0.000710144	0.0406101	909.467	-2.01081	-2.07891
NM_001113207	TSTD1	A_23_P217901	ref|Homo sapiens thiosulfate sulfurtransferase (rhodanese)-like domain containing 1 (TSTD1), transcript variant 1, mRNA [NM_001113207]	0.00070597	0.044438	897.522	-2.16875	0.000833527	0.0447015	970.226	-1.97996	-2.07435
NM_002705	PPL	A_23_P106906	ref|Homo sapiens periplakin (PPL), mRNA [NM_002705]	0.000873417	0.0494875	978.539	-2.11768	0.000744933	0.0414987	927.099	-2.00399	-2.06084
NM_005957	MTHFR	A_23_P400078	ref|Homo sapiens 5,10-methylenetetrahydrofolate reductase (NADPH) (MTHFR), mRNA [NM_005957]	0.000806392	0.047565	947.312	-2.13941	0.00092931	0.0476457	1012.2	-1.95901	-2.04921
NM_001304	CPD	A_24_P53282	ref|Homo sapiens carboxypeptidase D (CPD), mRNA [NM_001304]	0.000856951	0.0490053	971.104	-2.12515	0.000947864	0.0481958	1019.58	-1.95757	-2.04136

## Sheet: ChIP Enrichment Analysis
Term	Overlap	P-value	Adjusted P-value	Z-score	Combined Score	Genes
E2F4-17652178 (human)	87/1002	2.164207069991145E-38	2.5862274486394182E-36	-2.7750036528831963	227.39174447865966	INCENP;ESPL1;KIF4A;SERF2;GTSE1;HIST1H1D;HIST1H1B;ANP32E;FANCD2;HIST1H4L;HIST1H4B;HIST1H4D;HELLS;HIST1H3B;HIST1H3D;HIST1H3H;KIF2C;KIF11;PTGER4;KIF15;EXO1;TMC4;C1ORF112;AURKB;LMNB1;VRK1;CLSPN;HMMR;ZWILCH;BIRC5;KIF20A;TTK;BLM;BRCA1;TROAP;TMPO;FOS;SHCBP1;RAD51AP1;KIFC1;XRCC2;CDCA8;CDCA7;HIST1H2BK;CDCA2;CCNA2;CDCA3;SKP2;SPAG5;MKI67;PCNA;ZNF219;TPX2;RRM2;POLA2;CDC45L;BUB1;TRIP13;CCNB1;HIST1H2AL;ASPM;RB…
SOX2-20726797 (human)	140/2564	2.1045674809603106E-40	5.029916279495143E-38	-1.6437565893411532	141.17046804271428	TAGLN;ROR1;TFPI;HSD11B2;FANCD2;SORBS2;IFITM1;CDKN1C;HDAC4;FBXO32;E2F8;AHNAK;NRGN;TMC4;HAS2;HAS3;LETMD1;CRIP2;CD59;SLC16A4;CD14;TTK;METTL7A;GBP2;DEFB1;SACS;PLEKHA6;SGPP2;CD82;CUEDC1;WFDC2;MAOA;SYTL2;CCNE2;CYBRD1;SIX1;BMP2K;RHBDL2;PADI2;PBK;HMGA2;IFIT2;RARRES1;LEMD1;AQP3;DEPDC1B;AKAP12;FAM43A;FAM54A;CKB;TJP3;PTHLH;PPL;GABARAPL1;SMTN;PTPRB;MUC20;CENPF;PLAC8;KLRC4;SERPINE1;ESPL1;GLUL;DCBLD2;TMEM125;P…
MYC-19030024 (mouse)	153/3868	4.9234526932779547E-29	3.922350645644771E-27	-1.1816646778780233	71.84888311717239	MYBL2;ANP32E;CDKN1C;E2F8;GAA;HAS2;HAS3;SLC25A23;TMPO;FOS;PGPEP1;PRODH;MAOA;RRM2;ANGPTL4;PBK;SMC2;SMC4;B3GALT4;LEMD1;DEPDC6;HNRPDL;KPNA2;CENPA;CENPO;F3;CRTC1;ELF3;HIST1H1D;HIST1H1B;BST2;IGBP1;KDELC1;NR4A2;HIST1H3B;HIST1H3D;HIST1H3H;KIF23;KIF11;KIF15;UPP1;NFATC4;GDF15;AURKB;TUBA4A;KLF7;PHGDH;KIF20A;UBE2C;GPRC5C;CDCA8;CDCA7;HIST1H2BK;KCNK5;CDCA2;CDCA4;CDCA3;EMG1;RPS29;HIST1H2AC;BCCIP;BUB1;NID2;HIST1…
E2F1-21310950 (human)	60/1145	1.7697552156947115E-16	2.1148574827551802E-15	-1.6923393293997835	57.1837888038888	NCAPG2;HIST1H1D;FANCD2;PTX3;HIST1H4B;HIST1H4C;HELLS;NR4A2;E2F7;E2F8;PSMC3IP;CALML5;SCNN1B;EXO1;AURKB;LMNB1;VRK1;FAM111B;CLSPN;FANCA;PKMYT1;ALDH6A1;BMF;DNMT1;TMPO;MLF1IP;XRCC2;LSM6;CDCA7;HIST1H2BK;PCNA;ZNF219;RRM2;EIF5A2;HIST1H2AC;POLA2;ZBTB1;HIST1H2AL;RBL1;POLE2;GINS1;GINS2;LOXL3;PBK;SCLT1;CDC25A;H2AFZ;RFC3;DZIP1L;CHMP1B;TIPIN;CASC5;MCM7;MCM3;MCM6;KPNA2;MTHFR;CENPA;MSI2;CENPM
SOX2-18692474 (mouse)	126/3319	3.93131110195634E-22	9.395833533675653E-21	-1.2170701475305639	56.1239978584692	TFPI;DUSP10;MYBL2;IFITM1;FBXO32;HAS3;LETMD1;DEFB1;SLC4A11;FOS;CEP55;PECAM1;FHIT;DDAH2;RRM2;B4GALT5;PBK;ALDH3A1;B3GALT4;LEMD1;DEPDC6;SUSD2;HNRPDL;KLHL7;TSHZ2;PIF1;KRT9;CENPA;CENPM;ANXA11;HIST1H1D;HIST1H1B;HIST1H1A;BST2;ABCA6;HIST1H4B;HIST1H4C;HIST1H4D;HIST1H3B;HIST1H3D;HIST1H3H;KIF2C;KIF11;UPP1;BLNK;KLF7;EPHA4;TRAPPC6A;KIF20A;PKMYT1;SNX1;DLC1;CDCA8;HIST1H2BK;KCNK5;CDCA4;CDCA3;HIST1H2AC;BUB1;HIST1H…
E2F1-18555785 (mouse)	153/4172	1.0672324654859293E-25	4.251142654185618E-24	-1.0312317637831558	55.495587246682994	TFPI;MYBL2;ANP32E;IFITM1;ERCC6L;E2F7;E2F8;HAS3;VRK1;DHFR;SLC4A11;CCNDBP1;FOS;CEP55;PRODH;MAOA;HN1;RRM2;ANGPTL4;SCLT1;SMC2;SMC4;LEMD1;DEPDC1B;SUSD2;HNRPDL;KLHL7;SMTN;CENPO;CENPM;CENPE;ANXA11;ESPL1;DCBLD2;ELF3;HIST1H1D;HIST1H1B;HIST1H1A;CKAP2L;PRC1;BST2;IGBP1;KDELC1;HIST1H4B;HIST1H4C;HIST1H4D;KIF23;KIF2C;KIF15;GDF15;HMGN2;AURKB;TUBA4A;EPHA4;TRAPPC6A;KIF20A;PKMYT1;ROBO4;SNX1;KLHL24;TUBA1A;TUBA1C;UBE…
SMAD3-18955504 (human)	84/1936	5.834374145889629E-18	1.0726272468212472E-16	-1.4898358554262836	54.78312741108611	DUSP10;CDR2L;IL7R;FBXO32;E2F8;AHNAK;HS3ST2;FST;CD59;ZWILCH;RIOK3;SLC37A2;BMF;SLC4A11;KRT6B;CUEDC1;BCL2L11;ADAMTS6;SYTL2;KCNK15;HN1;CDC45L;BMP2K;ANGPTL4;CLCF1;ALDH3A1;SMC2;RARRES2;AQP3;LGALS3;ADAM19;PTHLH;GABARAPL1;KRT9;MTHFR;PTPRB;ANXA11;KLRC3;SERPINE1;F3;KLRC1;PLCXD2;SH3PXD2A;SLC8A1;RELT;P2RY2;PC;CASP1;SLC35E2;UPP1;TRDMT1;ZBED2;HMGN2;BBOX1;PRKCDBP;KLF7;C7ORF29;TMEM80;TUBA1A;TUBA1C;TMEM87A;XRCC2;…
SMAD2-18955504 (human)	84/1936	5.834374145889629E-18	1.0726272468212472E-16	-1.4898358554262836	54.78312741108611	DUSP10;CDR2L;IL7R;FBXO32;E2F8;AHNAK;HS3ST2;FST;CD59;ZWILCH;RIOK3;SLC37A2;BMF;SLC4A11;KRT6B;CUEDC1;BCL2L11;ADAMTS6;SYTL2;KCNK15;HN1;CDC45L;BMP2K;ANGPTL4;CLCF1;ALDH3A1;SMC2;RARRES2;AQP3;LGALS3;ADAM19;PTHLH;GABARAPL1;KRT9;MTHFR;PTPRB;ANXA11;KLRC3;SERPINE1;F3;KLRC1;PLCXD2;SH3PXD2A;SLC8A1;RELT;P2RY2;PC;CASP1;SLC35E2;UPP1;TRDMT1;ZBED2;HMGN2;BBOX1;PRKCDBP;KLF7;C7ORF29;TMEM80;TUBA1A;TUBA1C;TMEM87A;XRCC2;…
ESR2-21235772 (human)	32/424	3.618981250876678E-13	2.790117803095245E-12	-1.7724412508578775	47.15568834285107	VTCN1;MAOA;PPFIBP2;ELF3;SERPINA3;CCDC64B;CAPN8;MB;PNPLA7;VAMP5;ANGPTL4;WIPI1;WISP2;CLCF1;CD9;TSC22D3;CALML5;GDF15;B3GALT4;RAB26;DEPDC6;RAB15;TPD52L1;RAD54B;PRPS1;FXYD3;PPL;ENTPD8;BMF;SULT2B1;CD82;GPRC5C
KDM5B-21448134 (mouse)	143/3724	9.196266323680311E-26	4.251142654185618E-24	-0.8626401748314105	46.42285542992345	FANCD2;CYP4X1;HDAC4;FBXO32;TMEM38A;HAS3;DHFR;CEP78;TMPO;CUEDC1;MKI67;CYBRD1;PBK;NR3C2;SMC2;SMC4;DEPDC6;SLC27A1;HNRPDL;LYNX1;KPNA2;HJURP;CENPF;CENPE;CENPI;ESPL1;NCAPG2;SH3PXD2A;ST6GALNAC1;CKAP2L;ACSL1;PRC1;KDELC1;NR4A2;KIF23;KIF2C;KIF14;KIF11;KIF15;UPP1;HMGN2;AURKB;BLNK;BCL6;BIRC5;KIF20B;KIF20A;DNMT1;TUBA1A;GPRC5C;DLC1;CDCA8;CDCA7;CDCA2;CDCA4;ERBB3;PPFIBP2;BCCIP;BUB1;NID2;ANLN;ORC6L;COL4A1;SYT1;SF…
POU5F1-18692474 (mouse)	143/4233	1.132017793577735E-20	2.459565933318897E-19	-1.033291116337977	44.275627316859776	HSD11B2;DUSP10;MYBL2;PPAPDC1A;IFITM1;FBXO32;HAS3;VRK1;LETMD1;CEP78;DEFB1;SLC4A11;FOS;PECAM1;FHIT;PGPEP1;DDAH2;ADAMTS6;PVRL1;RRM2;B4GALT5;PBK;PPM1F;ALDH3A1;B3GALT4;LEMD1;CHRNA5;SUSD2;HNRPDL;KLHL7;TSHZ2;PIF1;SMTN;KPNA2;CENPA;PTPRB;CENPM;ANXA11;ELF3;HIST1H1D;HIST1H1B;MB;BST2;ABCA6;HIST1H4D;HIST1H3B;HIST1H3D;KIF2C;KIF14;KIF11;KIF15;UPP1;NFATC4;AURKB;TUBA4A;PKMYT1;ZC3H6;KLHL24;TUBA1A;DLC1;CDCA7;CDCA2;…
KLF4-18358816 (mouse)	73/1700	1.8169289998708575E-15	1.8880262216049344E-14	-1.3814252582029276	43.653948996054844	MYBL2;OPLAH;TACC3;IFITM1;CDKN1C;AHNAK;CD9;HAS3;BMF;CD82;TXNIP;KIFC1;TUBB2C;DDAH2;WFDC2;PVRL1;HN1;B4GALT5;PADI2;HMGA2;DEPDC1B;AKAP12;LGALS3;SUSD2;CKB;HNRPDL;ADAM19;NUPR1;TJP3;PPL;MTHFR;TCP11L2;INCENP;GLUL;ELF3;TCOF1;HIST1H1D;HIST1H1A;CKAP2L;HIST1H4D;HIST1H3D;HIST1H3H;KIF2C;UPP1;NFATC4;GDF15;PRKCDBP;EPHA4;KIF20A;ROBO4;SNX1;UBE2C;GPRC5C;CDCA7;RPS29;PCNA;TLE2;BCCIP;TRIP13;NID2;HIST1H2AI;ASS1;ANLN;FOS…
NANOG-18692474 (mouse)	109/3052	3.0400564007922654E-17	4.541084248683446E-16	-1.112439335956971	39.300474546231015	ROR1;MYBL2;KBTBD8;GTSE1;LRAT;IFITM1;HDAC4;FBXO32;AHNAK;CD9;HAS3;VRK1;LETMD1;SAA1;CD14;SLC25A23;SLC37A2;BLM;STAMBPL1;DEFB1;BMF;SACS;BRCA1;LMBRD1;CEP55;PECAM1;CUEDC1;SLC9A9;FHIT;KIFC1;TUBB2C;PVRL1;CCNE2;HMGB3;PBK;ALDH3A1;LEMD1;AQP3;DEPDC6;AKAP12;SUSD2;CKB;HNRPDL;ADAM19;TJP3;GTF2IRD2;TSHZ2;PIF1;KRT9;MTHFR;CENPA;CENPM;CENPI;ANXA11;GLUL;RECQL5;STAC2;HIST1H1B;HIST1H1A;MB;BST2;ABCA6;PEG10;HIST1H4B;HIST1…
EGR1-20690147 (human)	190/6207	2.8747836706600687E-23	9.815332818396521E-22	-0.7152475644456463	34.59861772801894	NOXA1;TAGLN;HSD11B2;RALGPS1;ACACB;ANP32E;HDAC4;GAA;SCNN1B;PLEKHA6;CUEDC1;PGPEP1;DDAH2;PRODH;PVRL1;MKI67;HGD;HN1;CYBRD1;ANGPTL4;PPM1F;TMPRSS13;SMTN;F3;CRTC1;KDELR3;SH3PXD2A;ACSL1;NR4A2;PC;TRAPPC6A;TPCN1;BCL6;BIRC5;TMTC1;DNMT1;PRKCE;DLC1;XRCC2;KCNK5;CDCA4;PPFIBP2;KCNK2;UNC5B;TUBB;DLG5;ABLIM2;CREB5;FAM102A;ABCG1;CYP4B1;ATAD3B;ENTPD8;MSLN;BBC3;SULT2B1;MCM7;MCM6;MSI2;RACGAP1;RORC;ROR1;GRIK4;OPLAH;TACC…
TAL1-20566737 (mouse)	78/1875	9.229316886590641E-16	1.0026394254068924E-14	-1.0420654722533307	33.589475082032095	NOXA1;TACC3;LRRC8C;AHNAK;CD9;VRK1;CRIP2;HOPX;BLM;PLEKHA6;TMPO;FOS;CEP55;TXNIP;NACC2;MLF1IP;FHIT;TUBB2C;DDAH2;BCL2L11;ODC1;GRAMD1C;POLA2;BMP2K;B4GALT5;WIPI1;ODF3B;HMGA2;HS3ST3A1;SMC2;AQP3;DEPDC1B;SUSD2;KLHL7;LPL;MTHFR;ANXA11;TCP11L2;INCENP;STAG3;HIST1H1A;RELT;P2RY2;HIST1H4C;HIST1H4D;HIST1H3D;HIST1H3H;PTGER4;UPP1;GRAMD4;KLF7;ICAM2;ZBTB16;BIRC5;KIF20B;ITGB2;ITGA4;PRKCE;GLRX;SELENBP1;HIST1H2BK;AP1S3;…
HNF4A-19822575 (human)	194/6083	6.123019066560795E-26	3.658503892270075E-24	-0.6179591611094406	33.34815867706533	TFPI;RALGPS1;DUSP10;ACACB;FANCD2;HDAC4;FST;DHFR;CYP4F12;SLC16A4;FAM118A;PLEKHA6;SLC4A11;PECAM1;CUEDC1;FHIT;PGPEP1;ADAMTS6;PVRL1;MAOA;HGD;TMEM217;B4GALT5;ANGPTL4;ALDH3A1;SCLT1;B3GALT4;DEPDC1B;DEPDC6;FAM54A;HNRPDL;IQCD;TSHZ2;PPL;PIF1;PXMP4;SMTN;KPNA2;TNXB;CENPE;ANXA11;SERPINE1;ESPL1;DCBLD2;CRTC1;NCAPG2;RECQL5;PLCXD2;SERPINA5;SH3PXD2A;ST6GALNAC1;CKAP2L;ACSL1;VAMP5;HIST1H4C;HIST1H3D;PC;GRAMD4;GDF15;H…
TCF3-18347094 (mouse)	81/2221	2.281007514222243E-13	1.879864813445228E-12	-1.1608723508307213	31.34334596581658	ROR1;TFPI;MYBL2;KBTBD8;PPAPDC1A;GRIK4;IFITM1;CDKN1C;HAS3;LETMD1;CRIP2;SLC25A23;BMF;DEFB1;BRCA1;SLC4A11;SGPP2;FOS;SLPI;RAD51AP1;PECAM1;SLC9A9;FHIT;BCL2L11;ADAMTS6;HGD;HMGA2;HS3ST3A1;CHRNA5;DEPDC6;AKAP12;HNRPDL;ADAM19;GTF2IRD2;TSHZ2;KRT9;MTHFR;CENPM;GLUL;STAC2;HIST1H1B;HIST1H1A;PDK4;PEG10;P2RY2;HIST1H4D;NR4A2;HIST1H3B;CASP1;KIF11;UPP1;EPHA4;TRAPPC6A;ZBTB16;BCL6;SLC22A18;PKMYT1;SNX1;TUBA1A;GPRC5C;DL…
FOXA2-19822575 (human)	108/2968	1.2383997210936716E-17	1.9731835556092501E-16	-0.8401873540620218	30.382614158265817	ROS1;TFPI;RALGPS1;DUSP10;SORBS2;HDAC4;IMPA2;AHNAK;SCNN1B;FST;PLD5;VRK1;NRP1;AES;CYP4F12;CD14;BMF;SACS;BRCA1;PLEKHA6;TXNIP;CSGALNACT1;PECAM1;CUEDC1;FHIT;ODC1;MAP2;CCNE2;NOD2;RRM2;DNM3;SIX1;POLE2;ANGPTL4;PLK1;CCNL2;ALDH3A1;B3GALT4;DEPDC1B;DEPDC6;AKAP12;CTNNBIP1;POLR2D;NUPR1;CPE;CPD;IQCD;TSHZ2;SMTN;KPNA2;SERPINE1;TMEM110;PLCXD2;SERPINA5;SH3PXD2A;ST6GALNAC1;EPB41L1;CKAP2L;ACSL1;SLC8A1;PDK4;PNPLA7;HIS…
E2F4-21247883 (human)	107/2998	6.595664822837841E-17	8.757577181434689E-16	-0.8494437279984635	29.451439116323883	YBX2;ANP32E;CDKN1C;E2F7;LRRC8C;E2F8;AHNAK;NRGN;HAS3;VRK1;LETMD1;FAM111B;CD59;CLSPN;RAD51;ZWILCH;DLGAP5;SLC37A2;PACS2;BLM;STAMBPL1;BMF;TMPO;CCNDBP1;FOS;CEP55;RAD51AP1;SPAG5;PVRL1;MKI67;ARHGAP11B;POLA2;TMEM201;POLE2;PLK1;RHOV;MAGOHB;CCNL2;CHRNA5;DEPDC1;LGALS3;CKB;PTHLH;IQCD;TIPIN;PIF1;CENPF;INCENP;ESPL1;GLUL;PRC1;RELT;KDELC1;HELLS;PC;KIF23;KIF2C;KIF14;KIF11;TRDMT1;EXO1;HMGN2;C1ORF112;AURKB;BLNK;FAN…
ESR1-21235772 (human)	19/228	5.109773438494002E-9	2.180778306785833E-8	-1.6382533625843194	28.900425782682287	VTCN1;CDCA7;RAB26;DEPDC6;MAOA;TPD52L1;ELF3;CAPN8;PNPLA7;VAMP5;CORO2A;PPL;BMF;WISP2;CLCF1;GPRC5C;TSC22D3;CALML5;GDF15
POU5F1-18347094 (mouse)	76/2109	2.4009927548998434E-12	1.7932414638158205E-11	-1.098509579484507	27.181972705759055	ROR1;DUSP10;MYBL2;PPAPDC1A;GRIK4;IFITM1;HDAC4;IMPA2;FST;HAS3;LETMD1;CRIP2;DHFR;DEFB1;SACS;BRCA1;SLC4A11;FOS;PECAM1;SLC9A9;FHIT;CCNA2;BCL2L11;ADAMTS6;HMGB3;PBK;HMGA2;LEMD1;CHRNA5;DEPDC6;AKAP12;HNRPDL;ADAM19;TSHZ2;MTHFR;GLUL;STAC2;HIST1H1D;HIST1H1B;HIST1H1A;PEG10;HIST1H4D;NR4A2;KIF11;UPP1;EXO1;HMGN2;AURKB;KLF7;EPHA4;RAB11FIP4;ZBTB16;BCL6;ZC3H6;CDCA7;CDCA2;CDCA4;BUB1;HIST1H2BE;NID2;WWTR1;ZBTB1;JAG1;…
TCF3-18692474 (mouse)	54/1351	1.3644350134839118E-10	7.953657761528168E-10	-1.2916948716823256	27.063873847256126	ROR1;MYBL2;KBTBD8;HIST1H1B;HIST1H1A;IFITM1;ABCA6;PEG10;HIST1H4B;HIST1H4D;CDKN1C;HIST1H3D;KIF11;UPP1;HAS3;VRK1;LETMD1;ZBTB16;SLC22A18;CEP78;PKMYT1;DEFB1;BMF;SLPI;SLC9A9;DLC1;FHIT;KIFC1;KCNK5;SKP2;ADAMTS6;RPS29;HIST1H2BE;WWTR1;ZBTB1;JAG1;UNC5B;HMGB3;ANLN;PBK;CDC25A;LEMD1;AQP3;H2AFX;UHRF1;ABCG1;HNRPDL;ADAM19;YPEL2;KLHL7;GTF2IRD2;CENPM;KIF18A;ANXA11
CREB1-20920259 (mouse)	108/3057	9.066730568957061E-17	1.1404992663056514E-15	-0.7517525001947459	25.865781524566934	HSD11B2;NDC80;ACACB;ANP32E;FANCD2;TACC3;FBXO32;IMPA2;AHNAK;GAA;HAS2;RAD51;ZWILCH;CEP78;FAM118A;BMF;BRCA1;PLEKHA6;SLC4A11;FOS;LMBRD1;CEP55;CUEDC1;KIFC1;VTCN1;CCNA2;SPAG5;POLA2;BMP2K;PLK4;FRMD5;CLCF1;MAGOHB;CCNL2;ALDH3A1;SCLT1;SMC4;SLC27A1;HNRPDL;TJP3;CPD;IQCD;PXMP4;SMTN;KPNA2;HJURP;CENPM;CENPE;TCP11L2;INCENP;TMEM125;NCAPG2;STAC2;KDELR3;SH3PXD2A;RELT;KDELC1;NR4A2;HIST1H3H;KIF2C;KIF11;KIF15;GRAMD4;E…
NR0B1-18358816 (mouse)	64/1691	2.1769839008465312E-11	1.3692082955324234E-10	-1.129264550936779	25.64742537692215	ROR1;TFPI;MYBL2;SERF2;OPLAH;IFITM1;IMPA2;TMEM38A;HAS3;LETMD1;NRP1;AES;TTK;SLC37A2;BMF;FOS;KIFC1;DDAH2;WFDC2;PVRL1;CDC45L;CLCF1;PADI2;AQP3;AKAP12;SUSD2;CKB;HNRPDL;ADAM19;TJP3;GLUL;STAC2;HIST1H1A;MB;HELLS;UPP1;NFATC4;PRKCDBP;MME;EPHA4;HMMR;FOLR1;UBE2C;PSRC1;CDCA3;EMG1;PPFIBP2;TLE2;RASA4;NID2;ASPM;ASS1;CDC25A;H2AFX;ABCG1;YPEL2;DDIT4L;CBX7;SGOL1;PRPS1;LAPTM5;MSI2;KIF18A;CKS2
SMAD4-21741376 (human)	85/2738	1.7474895993428348E-10	9.94404795816518E-10	-1.1921938304775608	24.71283897756017	ROS1;ROR1;RALGPS1;PPAPDC1A;PTX3;LRAT;AHNAK;HS3ST2;CALML5;NRP1;FAM118A;PLEKHA6;CD83;CEP55;CUEDC1;TUBB2C;PGPEP1;ODC1;FAM167A;BEAN;HMGB3;PBK;HMGA2;HS3ST3A1;FAM43A;TP53INP1;CPE;LPL;CENPO;MUC20;GLUL;DCBLD2;SH3PXD2A;SLC8A1;BST2;IGBP1;ESX1;ZBED2;VSTM2L;KLF7;EPHA4;AGPAT9;MBD5;RAB11FIP4;AMIGO2;ZBTB16;TMTC1;SERHL2;CCDC18;ITGA4;PSRC1;DLC1;KCNK5;CCDC99;AP1S3;MICAL3;TLE2;TRIP13;CMTM7;ZBTB1;JAG1;ANLN;DLG5;ANO4…
GATA1-21571218 (human)	94/2601	3.3994832238973014E-15	3.24990596204582E-14	-0.7916715660870464	24.587391312994175	RALGPS1;DUSP10;ANP32E;NFE2L3;IMPA2;TMEM38A;SCNN1B;DCLK1;PLD6;FAM111B;CD14;FAM118A;METTL7A;DEFB1;BMF;LOC90110;PLEKHA6;FOS;CD83;CD82;CSGALNACT1;PECAM1;C20ORF202;CUEDC1;SLC9A9;FHIT;PGPEP1;PVRL1;SYTL2;POLA2;NR3C2;IFIT2;RARRES1;PTTG1;DEPDC1B;DEPDC6;CKB;NALCN;PTHLH;TSHZ2;SMTN;LOC90246;KRT9;MTHFR;MUC20;CENPF;INCENP;GLUL;DCBLD2;ELF3;STAC2;HIST1H1D;SH3PXD2A;CKAP2L;ACSL1;MB;P2RY2;HIST1H4D;HIST1H3H;GDF15;HM…
TFAP2C-20629094 (human)	52/1203	2.115630503018539E-11	1.3665829465444078E-10	-1.0493586742974796	23.834647605273396	INCENP;TMEM110;ELF3;ZNF750;CNDP1;IL34;PC;KIF23;PRR15L;CD9;CALML5;DCLK1;RAB26;RAB15;LETMD1;TPD52L1;RAB11FIP4;AMIGO2;CD14;FXYD3;ITGB2;CORO2A;PLEKHA6;DNMT1;FAM176A;PRKCE;NACC2;KLHL30;SELENBP1;CCDC146;ODC1;PPFIBP2;KCNK2;SYTL2;CAPN8;FBP1;POLE2;DLG5;PBK;TSC22D3;C12ORF76;S100A8;S100A9;DEPDC6;FAM102A;FAM54A;IQCD;HRASLS2;MCM6;INF2;ANXA11;CKS2
YAP1-20516196 (mouse)	86/2329	1.9185060700520706E-14	1.7635498105478648E-13	-0.8002914671560329	23.501581300063823	ROR1;DUSP10;KBTBD8;PPAPDC1A;NDC80;ACACB;ANP32E;IL7R;PTX3;LRRC58;NFE2L3;HDAC4;E2F7;CD9;SCNN1B;DCLK1;HAS2;VRK1;LETMD1;GBP2;DEFB1;TMPO;CSGALNACT1;CUEDC1;SLC9A9;FHIT;LSM6;PVRL1;MKI67;CAPN8;PBK;HMGA2;NR3C2;ALDH3A1;SMC2;PDLIM7;HNRPDL;XKRX;CPE;SMTN;CENPE;PLAC8;ANXA11;GLUL;CRTC1;SH3PXD2A;HIST1H1D;HIST1H1B;HIST1H1A;INHBA;ACSL1;SLC8A1;PDK4;MB;RELT;KIF14;GDF15;MME;BLNK;TPD52L1;EPHA4;PPARA;AGPAT9;RAB11FIP4;B…
EP300-20729851 (mouse)	67/2093	5.816539460626986E-9	2.396815398430775E-8	-1.2672937701123366	22.236620581972193	DUSP10;MMP28;SORBS2;AHNAK;FST;HAS2;CRIP2;HOPX;NRP1;STAMBPL1;BMF;PLEKHA6;TMPO;FOS;CD82;CPLX3;MLF1IP;TUBB2C;PGPEP1;DDAH2;BCL2L11;ADAMTS6;HGD;DNM3;CAPN8;B4GALT5;PBK;PPM1F;PDLIM7;LEMD1;LGALS3;HNRPDL;ADAM19;NUPR1;KLHL7;KPNA2;TCP11L2;F3;SH3PXD2A;SLC8A1;PRC1;MB;NR4A2;AURKB;KLF7;EPHA4;TPCN1;TUBA1A;UBE2C;ZBTB7C;DLC1;LHFP;MICAL3;TLE2;ZBTB1;JAG1;UNC5B;TIMP2;PNRC1;DLG5;CREB5;YPEL2;TLR5;BBC3;MCM7;MSI2;KIF18A
MTF2-20144788 (mouse)	103/2981	2.1854043244238542E-15	2.176298473072088E-14	-0.7026764231522982	22.105192505365924	RORC;ROR1;PPAPDC1A;YBX2;LRRC26;PTX3;PLSCR4;LRAT;NFE2L3;UCN;CDKN1C;FBXO32;LRRC8C;AHNAK;NRGN;HS3ST2;SCNN1B;DCLK1;FST;PLD5;HAS3;NRP1;CD14;STAMBPL1;SGPP2;CD83;CSGALNACT1;CUEDC1;BCL2L11;PVRL1;KCNK15;CYBRD1;EIF5A2;SIX1;HMGB3;CLCF1;HMGA2;NR3C2;HS3ST3A1;LEMD1;AQP3;CHRNA5;LGALS3;SLC27A1;PTHLH;CPE;CPD;TSHZ2;PPL;LPL;PTPRB;TNXB;STAC2;KDELR3;INHBA;VAMP5;P2RY2;NR4A2;ESX1;PTGER4;VSTM2L;PRKCDBP;RAB15;EPHA4;AGPAT…
KLF4-18555785 (mouse)	83/2444	4.039252607167453E-12	2.83935697974418E-11	-0.8802656765621382	21.377127320237573	DUSP10;MYBL2;OPLAH;ERCC6L;CDKN1C;IMPA2;E2F7;E2F8;LMNB1;LETMD1;CRIP2;AES;CEP78;SLC25A23;PACS2;SPC25;SLC4A11;TMPO;TXNIP;MLF1IP;PGPEP1;DDAH2;BCL2L12;PRODH;PUS7;NOD2;HN1;POLA2;B4GALT5;CCNL2;HS3ST3A1;SMC2;B3GALT4;AKAP12;LGALS3;POLR2D;POLR3G;PPL;PIF1;SAP18;MTHFR;CENPA;CENPF;ANXA11;CRTC1;NCAPG2;KDELR3;PDK3;P2RY2;KIF11;KIF15;PRKCDBP;PPARA;AMIGO2;BIRC5;ALDH6A1;TUBA1C;KCNK5;CDCA4;SKP2;ERBB2;PCNA;BCCIP;TRIP…
PADI4-21655091 (human)	44/1037	1.3505099053090967E-9	6.724413903518211E-9	-1.1234839341405243	21.141182599293497	TMEM125;KBTBD8;RECQL5;PLCXD2;HIST1H1D;EPB41L1;FANCD2;HIST1H3B;PTGER4;ANKRD20A2;HMGN2;BLNK;HMMR;KIF20B;ALDH6A1;SLC37A2;TMEM80;SPC25;STAMBPL1;BRCA1;TMPO;TUBA1A;GLRX;RAD51AP1;HIST2H2AA4;CCDC146;SKP2;BCL2L12;WFDC2;HGD;ARHGAP11B;RRM2;SIX1;GINS1;N4BP2L2;POLQ;FAM43A;YPEL5;THBS3;CASC5;HPS5;C11ORF82;CENPO;RACGAP1
MITF-21258399 (human)	175/5578	2.6069692790053897E-22	6.922951752025422E-21	-0.4546938589387106	21.106636449725688	RALGPS1;MYBL2;HDAC4;FBXO32;E2F8;GAA;DCLK1;TMC4;HAS2;FAM118A;FOS;CSGALNACT1;CUEDC1;VTCN1;PRODH;MAP2;EIF5A2;BEAN;ZNF862;SH2D5;TMEM201;B4GALT5;IFI44L;HSD11B1L;PPM1F;NR3C2;B3GALT4;DEPDC6;DEPDC1;FAM43A;SLC27A1;SUSD2;HNRPDL;KLHL7;IQCD;TSHZ2;PPL;HRASLS2;SMTN;KPNA2;CENPA;CENPM;SERPINE1;ELF3;SH3PXD2A;ST6GALNAC1;ACSL1;HIST1H3D;PC;MTMR9L;UPP1;GRAMD4;NFATC4;GDF15;HMGN2;KLF7;PPARA;TRAPPC6A;AGPAT9;RAB11FIP4;TP…
MYCN-21190229 (human)	22/373	1.1207620954371718E-7	3.882060011731653E-7	-1.4230161040178024	21.00617909672898	RARRES1;AURKB;CDCA8;CDCA3;EMG1;KIF4A;RECQL5;FAM111B;FAM54A;SPRR3;ZWILCH;RASSF5;TTK;HMGB3;SACS;TROAP;KIF11;UBE2C;RAD51AP1;CREB5;MLF1IP;CDC25A
PAX3-FKHR-20663909 (human)	46/1063	3.0851972132257477E-10	1.6758230317294402E-9	-1.0245406597671345	20.702853595505967	KBTBD8;PLCXD2;NFE2L3;NR4A2;CD9;NFATC4;DCLK1;EXO1;FST;PLD5;PRKCDBP;HAS2;MME;KLF7;EPHA4;DHFR;PPARA;SEPP1;TMTC1;CCDC18;FAM84A;SGPP2;TMEM61;PRKCE;SHCBP1;TXNIP;VTCN1;CDCA7;PVRL1;MAOA;ARHGAP11B;DNM3;BMP2K;ASS1;DLG5;PBK;HMGA2;NAV3;DDIT4L;TLR4;SGOL1;PTHLH;CPD;PPP1R16B;MSI2;SLC10A7
MYC-19079543 (mouse)	54/1458	1.832734202204572E-9	8.760469486537855E-9	-1.1034997094965375	20.473248140459955	INCENP;STAG3;NOXA1;MYBL2;GTSE1;ANP32E;HELLS;KIF2C;NRGN;NFATC4;PRKCDBP;HAS2;KLF7;RAB11FIP4;HMMR;ZWILCH;BIRC5;SLC16A4;KIF20A;TMEM80;DNMT1;TYMS;TXNIP;DLC1;LSM6;CDCA8;CDCA7;KCNK5;EMG1;RPS29;ODC1;PCNA;POLA1;POLA2;CCNB1;NEIL1;TIMP2;ANGPTL4;TSC22D3;ESCO2;SFRS2;AKAP12;HNRPDL;YPEL5;POLR2D;BEST2;CBX7;GTF2IRD2;LYNX1;PRPS1;TIPIN;MCM7;KPNA2;CKS2
CNOT3-19339689 (mouse)	57/1547	7.585594027783911E-10	3.857355260936925E-9	-1.0336944065104854	20.02605536221722	HSD11B2;MYBL2;LRRC58;E2F7;HAS3;CEP78;RIOK3;BRCA1;TMPO;CD83;LSM6;CLCA2;CCNE2;PLK4;HMGA2;CCNL2;IFIT2;HNRPDL;PTHLH;CPE;PPL;SAP18;KPNA2;TCP11L2;GLUL;CRTC1;HIST1H1B;HIST1H1A;VAMP5;HIST1H4B;HIST1H4C;HIST1H4D;HELLS;NR4A2;HIST1H3B;HIST1H3D;HIST1H3H;HMGN2;CCDC18;TMEM80;GPRC5C;XRCC2;HIST1H2BK;CDCA4;HIST1H2AC;HIST1H2AI;ZBTB1;UNC5B;ORC6L;ABLIM2;COL4A1;H2AFZ;H2AFX;DZIP1L;CTPS;MCM7;MSI2
MYC-18358816 (mouse)	104/3413	3.1798526187933088E-12	2.3029841693684873E-11	-0.8050641820611307	19.719427462394606	MYBL2;E2F7;E2F8;TMEM38A;GAA;DHFR;CEP78;PRODH;MAOA;RRM2;ANGPTL4;SMC4;B3GALT4;DEPDC6;SLC27A1;KPNA2;CENPO;CENPM;ESPL1;CRTC1;CKAP2L;PRC1;BST2;PNPLA7;IGBP1;KDELC1;KIF2C;KIF11;KIF15;NFATC4;AURKB;KLF7;KIF20A;UBE2C;GPRC5C;DLC1;CDCA8;CDCA7;KCNK5;CDCA3;EMG1;RPS29;BCCIP;NID2;ANLN;ORC6L;H2AFX;SFRS2;UHRF1;CDC20;SGOL2;HPS5;MCM7;MCM3;MCM6;KIF18A;GTSE1;TACC3;ZWILCH;BLM;RAD51AP1;MLF1IP;KIFC1;TUBB2C;BCL2L11;ODC1;C…
SOX2-16153702 (human)	45/1278	1.73303150594101E-7	5.752701804443075E-7	-1.3562880839319431	19.487725005920662	ROR1;HIST1H1D;HIST1H1B;HIST1H1A;INHBA;TRIM22;LRAT;NFE2L3;HIST1H4L;HIST1H4C;HIST1H4D;HELLS;NR4A2;HIST1H3D;HIST1H3H;KIF2C;KIF11;KIF15;PRKCDBP;RAB15;HAS2;EPHA4;SNX1;UBE2C;CD82;SLC9A9;ERBB2;RPS29;PVRL1;HN1;TLE2;CDC45L;HIST1H2BE;WWTR1;HIST1H2AI;HIST1H2AL;TUBB;ORC6L;B3GALT4;H2AFX;RAD54B;TOP2A;POLR3G;TJP3;PTHLH
ZFP281-18757296 (mouse)	68/2004	4.494754425433566E-10	2.335318060170918E-9	-0.9791998005295822	19.461711327387228	RORC;ROR1;HSD11B2;MYBL2;YBX2;CYP4X1;CDKN1C;LRRC8C;FST;HAS2;HAS3;CRIP2;NRP1;AES;TTK;SLC25A23;STAMBPL1;BMF;TXNIP;DDAH2;BCL2L11;WFDC2;CCNE2;B4GALT5;HMGA2;CCNL2;B3GALT4;AQP3;SLC27A1;HNRPDL;ADAM19;KLHL7;SERPINE1;GLUL;CRTC1;BNIPL;STAC2;SH3PXD2A;PEG10;KDELC1;HELLS;NR4A2;PTGER4;UPP1;NFATC4;HMGN2;PRKCDBP;MME;FOLR1;UBE2C;PRKCE;GPRC5C;GLRX;CDCA2;ERBB3;ELAVL3;WWTR1;RASSF5;H2AFZ;SFRS2;UHRF1;DZIP1L;FJX1;YPEL5;…
AR-20517297 (human)	73/2047	1.0879677156616026E-11	7.429265258374944E-11	-0.8007158498760222	18.675103019225592	TAGLN;SORBS2;PTX3;CALML5;SCNN1B;NRP1;NIPAL4;KRT6B;TXNIP;CSGALNACT1;PECAM1;FHIT;CCNA2;MKI67;SYTL2;HN1;CYBRD1;POLA2;DNM3;LOC645166;FLJ35390;LOC100131551;BMP2K;MAGOHB;HMGA2;NR3C2;SCLT1;SMC4;LGALS3;TP53INP1;C9ORF152;HRASLS2;TCP11L2;INCENP;TMEM110;ST6GALNAC1;SPRR3;IGBP1;HIST1H4B;HIST1H3B;PC;KIF23;DENND5B;PTGER4;UPP1;GRAMD4;TRDMT1;EXO1;BBOX1;PPARA;TPCN1;KIF20A;ACAN;GLRX;CDCA7;CDCA2;LHFP;PPFIBP2;RBL1;FB…
CEBPB-20176806 (mouse)	61/1588	3.7653918358909784E-11	2.307509355840882E-10	-0.8414989161826879	18.67259351165562	TAGLN;ROR1;MMP28;YBX2;ANP32E;LRRC8C;PRR15L;AHNAK;HS3ST2;CD9;AES;GBP2;STAMBPL1;TMPO;CCNDBP1;MLF1IP;CSGALNACT1;ADAMTS6;NOD2;CCNB1;CLCF1;MAGOHB;AQP3;CTNNBIP1;GABARAPL1;TNXB;RECQL5;CKAP2L;AZGP1;VAMP5;CASP1;AURKB;GLDC;BCO2;SEPP1;FANCA;PHGDH;ITGB2;DNMT1;TUBA1A;TUBA1C;GPRC5C;TGM1;DLC1;KCNK5;CDCA2;CCDC99;BCCIP;PCSK9;ELAVL3;ZBTB1;ANLN;LOXL3;FOSL1;CREB5;CDC25A;GCNT3;FAM102A;SH2D2A;CDKN3;ATAD5
ESR1-17901129 (mouse)	24/444	1.385600107471613E-7	4.730834652653079E-7	-1.2652662343111027	18.42732985083968	KIFC1;RORC;ADAMTS6;SERF2;HGD;CAPN8;PDK4;BMP2K;ASS1;P2RY2;CRAT;GDF15;SFRS2;MME;CRIP2;PPARA;SAA2;SAA1;BCL6;BIRC5;PCCA;SLPI;GPRC5C;CENPA
CREM-20920259 (mouse)	179/5776	2.6023076001543587E-22	6.922951752025422E-21	-0.3916663254207358	18.18093334172284	DUSP10;MYBL2;ANP32E;FANCD2;CDKN1C;E2F7;GAA;LETMD1;NOP56;CEP78;FAM118A;TMPO;SGPP2;FOS;CEP55;PVRL1;MAOA;HN1;RRM2;EIF5A2;CAPN8;TMEM201;B4GALT5;MAGOHB;SCLT1;HS3ST3A1;SMC4;CHRNA5;DEPDC1B;SLC27A1;HNRPDL;KLHL7;KPNA2;CENPF;CENPE;CENPI;ANXA11;CRTC1;NCAPG2;KDELR3;CKAP2L;ACSL1;HIST1H4C;NR4A2;KIF23;KIF2C;KIF14;KIF11;GRAMD4;GDF15;HMGN2;AURKB;TUBA4A;EPHA4;PPARA;TRAPPC6A;AGPAT9;RAB11FIP4;TPCN1;BCL6;BIRC5;ZC3H6;…
E2F1-17053090 (human)	62/1726	3.400104148459935E-10	1.8058330921820543E-9	-0.9017653943544145	18.154560773808242	SERF2;MMP28;IMPA2;E2F8;NRGN;CD9;VRK1;LETMD1;CD59;SLC37A2;BLM;SACS;BRCA1;TMPO;EML2;SYTL2;POLA2;POLE2;WIPI1;CCNL2;ALDH3A1;CHRNA5;SAP18;SMTN;PTPRB;ESPL1;RECQL5;SERPINA5;EPB41L1;PDK3;MB;IGBP1;PC;CLDN8;PPARA;TRAPPC6A;AMIGO2;ALDH6A1;FAM83E;UBE2C;SHCBP1;TGM1;CDCA3;ERBB3;PCNA;MICAL3;UMODL1;JAG1;RBL1;DLG3;COL4A1;H2AFX;NAV3;SFRS2;RFC3;ABCG1;CBR3;PRPS1;PPP1R16B;CASC5;MSI2;KIF18A
POU5F1-16153702 (human)	28/622	4.597344425726622E-7	1.4269679451281334E-6	-1.270318001649687	17.09842781627471	ROR1;HIST1H1D;HIST1H1B;HN1;HIST1H2BE;TRIM22;LRAT;SIX1;NFE2L3;HIST1H4L;NR4A2;HIST1H3D;KIF15;B3GALT4;GLDC;PRKCDBP;HAS2;KLF7;EPHA4;RAD54B;TOP2A;AMIGO2;POLR3G;PHGDH;TJP3;PTHLH;PRPS1;CD82
CTNNB1-20460455 (human)	42/988	3.0690004689144105E-9	1.3839454944727247E-8	-0.9444780757155135	17.091031837944584	PLCXD2;SH3PXD2A;PNPLA7;HELLS;HDAC4;FBXO32;PSMC3IP;KIF11;UPP1;HMGN2;AGPAT9;CYP4F12;SLC37A2;PACS2;BRCA1;PRKCE;CUEDC1;HGD;WDR62;AP1S3;ZNF862;CMTM7;NEIL1;B4GALT5;FRMD5;ANO4;ABLIM2;CREB5;SYT1;NAV3;ADAM19;EHF;STAU2;CPE;CPD;IQCD;PCCA;TSHZ2;BBC3;SULT2B1;MSI2;ANXA11
RCOR3-21632747 (mouse)	97/2851	4.089610309826184E-14	3.6200624594387336E-13	-0.586734660544581	16.80825525359226	RALGPS1;PPAPDC1A;ACACB;MMP28;CDR2L;CCDC64B;LRAT;UCN;E2F7;GAA;HS3ST2;CD9;HAS3;LMNB1;VRK1;LETMD1;CRIP2;AES;RAD51;CEP78;SACS;NIPAL4;EML2;CD83;CEP55;NACC2;PECAM1;VTCN1;LSM6;BCL2L11;PVRL1;FAM167A;CYBRD1;EIF5A2;TMEM201;TMEM217;PPM1F;FAM43A;KLHL7;PTHLH;LYNX1;CPD;DSCC1;TSHZ2;ATP6V1B1;PXMP4;SMTN;CENPA;CENPF;TCP11L2;STAC2;HIST1H1D;HIST1H1B;HIST1H1A;CKAP2L;PDK4;PEG10;HIST1H4B;HIST1H4D;DENND5B;KIF14;NFATC4;V…
STAT4-19710469 (mouse)	58/1939	5.718753455867299E-7	1.6873852789534375E-6	-1.168596779664352	15.533374498918569	TFPI;IL7R;LRRC8C;AHNAK;VRK1;LETMD1;RIOK3;GBP2;BRCA1;FOS;CD83;CD82;PECAM1;FHIT;KIFC1;DDAH2;BCL2L11;ADAMTS6;DNM3;B4GALT5;RHOV;CLCF1;ADAMTS13;ADAM19;CPD;PLAC8;KLRC3;SERPINE1;KLRC1;HIST1H1A;MB;BST2;HIST1H4B;HIST1H4C;HIST1H3B;CASP1;PTGER4;KLF7;AMIGO2;BCL6;DNMT1;HIST1H2BK;PCNA;TPX2;HIST1H2AC;RASSF5;ZBTB1;RBL1;TIMP2;TNFSF10;FOSL1;H2AFX;GCNT3;CDC20;THBS3;PRPS1;CD274;MCM3
NANOG-16153702 (human)	53/1686	4.295928312027169E-7	1.3509564033874913E-6	-1.1317915097402205	15.295820192101063	ROR1;TRIM22;LRAT;NFE2L3;TMEM38A;HAS2;CD82;FHIT;HGD;CCNE2;HN1;CDC45L;SIX1;NR3C2;B3GALT4;FAM54A;POLR3G;PTHLH;KDELR3;HIST1H1D;HIST1H1B;HIST1H1A;HIST1H4L;HIST1H4C;HIST1H4D;HELLS;NR4A2;HIST1H3D;KIF15;PRKCDBP;RAB15;KLF7;EPHA4;SEPP1;FANCA;AMIGO2;PHGDH;PKMYT1;SNX1;ERBB2;PCNA;TPX2;TLE2;HIST1H2BE;WWTR1;HIST1H2AL;ORC6L;H2AFZ;H2AFX;RAD54B;TOP2A;PPP1R16B;CKS2
KLF4-19030024 (mouse)	54/1502	4.901984288147711E-9	2.1301349906678237E-8	-0.8340840640471229	14.733674104515467	MYBL2;HIST1H1D;HIST1H1B;HIST1H1A;BST2;LRAT;IFITM1;HIST1H4D;HELLS;NR4A2;ESX1;HIST1H3B;HIST1H3D;HIST1H3H;PTGER4;NFATC4;HMGN2;AURKB;PRKCDBP;HAS2;HAS3;ZWILCH;BIRC5;SLC25A23;BMF;FOS;TUBA1A;CD82;TXNIP;RAD51AP1;TUBB2C;CDCA7;CCNA2;BCL2L11;PRODH;PCNA;SYTL2;CCNE2;NID2;CCNB1;SIX1;ANLN;CCDC106;ABLIM2;IFIT2;LEMD1;UHRF1;AKAP12;CDC20;FJX1;HNRPDL;MCM10;CBX7;ATAD5
PRDM14-21183938 (mouse)	69/1944	5.161532984294949E-11	3.0840159581162317E-10	-0.6626360693745144	14.51147699095933	GTSE1;OPLAH;NFE2L3;IFITM1;IL34;CD9;HAS3;NINL;CEP78;FAM118A;CEP55;NACC2;CSGALNACT1;PECAM1;SLC9A9;PGPEP1;HMGB3;B4GALT5;CRAT;FRMD5;RARRES1;LEMD1;DEPDC1B;AKAP12;FAM43A;ADAM19;POLR3G;CPE;TSHZ2;TIPIN;ANXA11;GLUL;TCOF1;SH3PXD2A;BST2;PEG10;HELLS;KIF11;UPP1;NFATC4;VSTM2L;BLNK;KLF7;EPHA4;FAM84A;TUBA1C;ZBTB7C;DLC1;CDCA7;TLE2;KANK4;ZBTB1;UNC5B;ASS1;GINS2;DLG3;H2AFZ;H2AFX;UHRF1;CDC20;ABCG1;RAD54B;CHMP1B;YPEL2…
RUNX1-21571218 (human)	153/5071	9.73400196095698E-18	1.661733191906227E-16	-0.39648459193412466	14.405673055332187	RALGPS1;DUSP10;ANP32E;HDAC4;FBXO32;TMEM38A;DCLK1;VRK1;NOP56;SLC25A23;FAM118A;PLEKHA6;TMPO;FOS;NIPAL4;EML2;CSGALNACT1;PECAM1;C20ORF202;CUEDC1;FHIT;PGPEP1;PVRL1;NOD2;TMEM201;HSD11B1L;DEPDC6;TMPRSS13;LYNX1;IQCD;DSCC1;CENPF;SERPINE1;NCAPG2;PLCXD2;HIST1H1D;HIST1H1A;ST6GALNAC1;AZGP1;PNPLA7;HIST1H4L;HIST1H4B;HIST1H4D;NR4A2;HIST1H3B;PC;KIF11;GRAMD4;NFATC4;GDF15;EPHA4;AGPAT9;ICAM2;BCL6;BIRC5;PKMYT1;SNHG7;…
RARG-19884340 (mouse)	21/390	8.816891749081514E-7	2.5388399132897374E-6	-1.0664378943279145	13.739776071056259	PGPEP1;BCL2L11;NID2;WWTR1;IL34;CLCF1;ALDH3A1;GDF15;PDLIM7;S100A8;BLNK;NRP1;AGPAT9;NUPR1;PPL;MSLN;GABARAPL1;KLHL24;UBE2C;INF2;TCP11L2
WT1-20215353 (mouse)	58/1663	3.6873527649682457E-9	1.6319950200507605E-8	-0.766053295038734	13.736007821575585	RORC;HSD11B2;CDKN1C;FBXO32;IMPA2;TMEM38A;FST;HAS2;SLC37A2;LMBRD1;PGPEP1;BCL2L11;BMP2K;WIPI1;CLCF1;PADI2;HMGA2;PDLIM7;B3GALT4;SLC27A1;CPD;GABARAPL1;TCP11L2;GLUL;DCBLD2;CRTC1;STAC2;SH3PXD2A;KDELC1;HELLS;NR4A2;KIF23;NFATC4;GLDC;TPD52L1;PHGDH;VIPR1;PRKCE;UBE2C;GPRC5C;TMEM159;GLRX;ZBTB7C;ERBB2;AP1S3;BCCIP;RASA4;WWTR1;ZBTB1;JAG1;LOXL3;H2AFZ;FJX1;COL11A1;FZD4;LAPTM5;BBC3;MSI2
TRP63-18441228 (mouse)	12/143	3.1793407101464167E-6	8.259374236141235E-6	-1.1707602368453403	13.702767161008213	PTTG1;AURKB;ASS1;DUSP10;KIF23;ELF3;FOS;FOSL1;TPX2;RRM2;EHF;CENPA
TCFCP2L1-18555785 (mouse)	66/1987	1.889981971147404E-9	8.85697433537705E-9	-0.7358768717279512	13.6446735701671	DUSP10;CDR2L;GTSE1;YBX2;OPLAH;IMPA2;E2F7;AHNAK;GAA;HAS3;TMPO;CEP55;RAD51AP1;MLF1IP;CUEDC1;TUBB2C;CCNA2;WFDC2;SYTL2;CCNE2;NOD2;RRM2;SIX1;BMP2K;B4GALT5;CRAT;CCNL2;PTTG1;AQP3;DEPDC1B;SLC27A1;GABARAPL1;SERPINE1;ELF3;SH3PXD2A;PDK3;HIST1H3D;RAB15;MME;FANCA;RAB11FIP4;TMEM80;SNX1;TUBA1C;TMEM87A;ZBTB7C;CDCA7;CDCA4;PPFIBP2;TRIP13;WWTR1;CMTM7;ANLN;ABLIM2;SYT1;SFRS2;CDC20;CBR3;YPEL3;DDIT4L;SGOL2;PRPS1;PAQR6;…
NANOG-18347094 (mouse)	63/1908	5.6469907843783984E-9	2.3677733288884864E-8	-0.7384769229717958	12.966717458585446	TFPI;ROR1;MYBL2;KBTBD8;SERF2;IFITM1;IMPA2;HAS3;LETMD1;DEFB1;SACS;BRCA1;PECAM1;SLC9A9;FHIT;ADAMTS6;CCNL2;B3GALT4;HNRPDL;ADAM19;GTF2IRD2;TSHZ2;MTHFR;CENPA;CENPI;GLUL;STAC2;KDELR3;HIST1H1B;PEG10;HIST1H3B;KIF23;KIF11;UPP1;BLNK;ZBTB16;HMMR;BCL6;PKMYT1;CDCA7;CDCA2;CDCA3;RPS29;BUB1;HIST1H2BE;NID2;JAG1;NEIL1;LOXL3;CREB5;H2AFZ;H2AFX;UHRF1;YPEL5;EHF;DDIT4L;CBX7;SGOL1;PRPS1;MSLN;MSI2;KIF18A;CKS2
AR-19668381 (human)	104/3519	1.827728451386282E-11	1.2134086107814485E-10	-0.5545195803181184	12.661022568102023	PPAPDC1A;ACACB;HDAC4;E2F8;FAM118A;SLC37A2;SGPP2;CEP55;PECAM1;FHIT;VTCN1;PGPEP1;WFDC2;B4GALT5;NR3C2;LEMD1;DEPDC1;XKRX;TSHZ2;CENPO;ELF3;SH3PXD2A;SPRR3;AZGP1;IGBP1;EPHA4;PPARA;MBD5;TMTC1;DNMT1;PRKCE;KCNK5;PPFIBP2;NID2;RASSF5;DLG5;ABLIM2;COL4A1;SYT1;H2AFZ;DZIP1L;RAD54B;TLR4;TLR5;ARL13B;SULT2B1;MCM6;MSI2;RORC;ROS1;ROR1;KBTBD8;MMP28;SORBS2;PLSCR4;GRIK4;OPLAH;CD9;NRP1;PACS2;BMF;CPAMD8;CD82;KIFC1;BCL2L11…
PPARD-21283829 (human)	109/3447	8.635650881241944E-14	7.371144859345802E-13	-0.44660153433137756	12.476275278776573	DUSP10;ZNF750;E2F7;E2F8;GAA;LETMD1;SLPI;CEP55;CUEDC1;FHIT;AIF1L;CWH43;PVRL1;MKI67;MAP2;EIF5A2;ZNF862;TMEM201;ANGPTL4;B4GALT5;HSD11B1L;SMC4;S100A9;FAM43A;SUSD2;TP53INP1;TSHZ2;SMTN;ANXA11;CENPW;SERPINE1;MB;PNPLA7;HIST1H4B;HIST1H4C;HIST1H4D;NR4A2;HIST1H3B;KIF11;GDF15;EPHA4;MBD5;AMIGO2;TPCN1;AURKAPS1;BCL6;BIRC5;ROBO4;FAM84A;PRKCE;CDCA7;EMG1;ERBB2;KCNK2;BCCIP;TUBB;DLG5;FOSL1;SYT1;YPEL3;TLR5;SGOL2;MCM6…
MYC-18555785 (mouse)	43/1200	2.0834715752234017E-7	6.775848134178236E-7	-0.7975107373282531	11.328425578032073	INCENP;F3;TCOF1;HIST1H1B;PRC1;GDF15;KIF20A;TMEM80;TUBA1C;PSRC1;DLC1;LSM6;TUBB2C;CDCA7;KCNK5;CDCA4;EMG1;RPS29;ODC1;PCNA;RRM2;TRIP13;ASPM;ANLN;ANGPTL4;PLK4;PLK1;PNRC1;CCDC106;SMC2;H2AFX;SFRS2;UHRF1;AKAP12;TOP2A;CTPS;CBX7;PIF1;CASC5;MCM7;MCM6;KPNA2;CENPO
TRIM28-19339689 (mouse)	89/3072	1.7246005963882765E-9	8.411827398710165E-9	-0.5811738612888298	10.806130055779663	ROR1;MYBL2;SERF2;LRRC58;IFITM1;CDKN1C;E2F8;HAS3;LETMD1;CRIP2;CEP78;BLM;STAMBPL1;BMF;TMPO;CD83;LSM6;CCNA2;PVRL1;ODC1;KCNK15;CCNE2;ANGPTL4;CRAT;CLCF1;HMGA2;CCNL2;HS3ST3A1;SMC4;DEPDC1B;DEPDC6;AKAP12;CKB;HNRPDL;ADAM19;GTF2IRD2;CPE;PPL;SAP18;KPNA2;CENPM;GLUL;CRTC1;STAC2;VAMP5;NR4A2;KIF23;HMGN2;PRKCDBP;MME;TRAPPC6A;AMIGO2;BCL6;ROBO4;TMEM80;PRKCE;GPRC5C;TMEM158;GLRX;XRCC2;CDCA7;CDCA4;LHFP;ERBB2;TLE2;TRI…
CCND1-20090754 (mouse)	66/2137	2.853939198421438E-8	1.0334719218526115E-7	-0.6527433392051964	10.499488699683809	DUSP10;KBTBD8;ANP32E;TACC3;HAS2;CLSPN;NRP1;ZWILCH;SLC25A23;BLM;BRCA1;FOS;RAD51AP1;TUBB2C;DDAH2;BCL2L12;BCL2L11;RRM2;WIPI1;IFIT2;B3GALT4;SLC27A1;KLHL7;GABARAPL1;CENPA;TCP11L2;INCENP;GLUL;HIST1H1D;BST2;KDELC1;NR4A2;HIST1H3B;HIST1H3H;NFATC4;AURKB;KLF7;EPHA4;HMMR;BIRC5;KIF20A;ALDH6A1;TMEM80;DNMT1;UBE2C;PRKCE;TMEM87A;PSRC1;CDCA7;CDCA2;CDCA3;PCNA;RASA4;HIST1H2BE;WWTR1;ORC6L;CDC25A;SYT1;H2AFZ;SFRS2;UHRF…
CUX1-19635798 (human)	76/3052	8.363735255028578E-6	1.8857855905205945E-5	-0.9625573562388237	10.4712581400318	DUSP10;ANP32E;FANCD2;HAS2;LMNB1;CD59;RAD51;CD14;BLM;BMF;BRCA1;SLPI;CCNA2;CLCA2;BCL2L12;SPAG5;SYTL2;POLA2;CDC45L;SIX1;POLE2;IFIT2;PTHLH;SAP18;CENPF;PLAC8;KLRC4;STAG3;ELF3;TCOF1;HIST1H1D;HIST1H1A;EPB41L1;PRC1;MB;IGBP1;VAMP5;HIST1H4B;HELLS;HIST1H3D;HIST1H3H;KIF2C;WISP2;KIF11;EXO1;PRKCDBP;TPCN1;KIF20A;ROBO4;ITGB2;TROAP;GLRX;CDCA7;HIST1H2BK;CDCA3;RPS29;TPX2;HIST1H2AC;ASPM;ORC6L;TNFSF10;LOXL3;AKR1C1;CR…
SOX2-21211035 (human)	99/3420	1.8491469452146362E-10	1.0277816742006932E-9	-0.5002117053812503	10.352312961407534	NOXA1;RALGPS1;HDAC4;HAS2;VRK1;DHFR;ADAMTS6;PVRL1;MAP2;EIF5A2;B4GALT5;NR3C2;HS3ST3A1;DEPDC1B;FAM43A;PTHLH;TSHZ2;PTPRB;CENPO;CENPM;CRTC1;NCAPG2;SH3PXD2A;NR4A2;ESX1;HMGN2;EPHA4;PPARA;MBD5;TPCN1;BIRC5;TMTC1;FLJ45721;FAM84A;PRKCE;GPRC5C;DLC1;XRCC2;SELENBP1;ERBB3;RPS29;KCNK2;ZBTB1;JAG1;UNC5B;DLG5;ABLIM2;TMEM45A;COL4A1;CREB5;SYT1;CDC20;ABCG1;COL11A1;YPEL5;YPEL2;DDIT4L;THBS3;TLR4;SGOL2;MCM3;MSI2;ROR1;GTS…
TCFAP2C-20176728 (mouse)	80/2667	2.920531572410508E-9	1.3423212419348296E-8	-0.562704732426715	10.199743739042924	ROR1;RALGPS1;MYBL2;SERF2;YBX2;LRRC58;TACC3;NFE2L3;CDKN1C;E2F8;PLD5;CRIP2;SAA1;SLC16A4;TMPO;CEP55;CUEDC1;KIFC1;LSM6;CCNA2;BCL2L11;WFDC2;PUS7;ODC1;HN1;BMP2K;B4GALT5;RHOV;CLCF1;CCNL2;SMC4;DEPDC6;LGALS3;ADAM19;GABARAPL1;SAP18;SMTN;KPNA2;KRT9;CENPA;CENPI;ANXA11;INCENP;KDELR3;HIST1H1B;KDELC1;SYT17;KIF23;PRKCDBP;BLNK;KLF7;EPHA4;RAB11FIP4;TPCN1;BCL6;SLC22A18;VIPR1;ROBO4;TMEM80;FOLR1;PRKCE;GPRC5C;SELENBP1…
SOX2-18555785 (mouse)	23/497	3.1269770300654365E-6	8.212610002039991E-6	-0.8628916855944491	10.104323385614189	TFPI;HIST1H1B;HIST1H1A;RRM2;NID2;UPP1;AURKB;AQP3;H2AFX;RFC3;MME;KLF7;CRIP2;ABCG1;HMMR;PPP1R16B;BMF;DEFB1;SACS;BRCA1;FOS;MCM7;KLHL24
SOX17-20123909 (mouse)	63/1947	1.172083075936315E-8	4.592259920471791E-8	-0.597944888377453	10.103061290245188	DUSP10;MYBL2;OPLAH;PLD5;LMNB1;VRK1;NRP1;TTK;PLEKHA6;FOS;CCNA2;BCL2L11;ODC1;HGD;HN1;RRM2;POLA2;CDC45L;SIX1;CHRNA5;DEPDC6;ADAM19;PPL;SAP18;PTPRB;CENPO;INCENP;KLRC1;STAC2;HIST1H1D;SLC8A1;IGBP1;KDELC1;KIF23;UPP1;TRDMT1;AURKB;PRKCDBP;RAB15;MME;KLF7;EPHA4;SEPP1;ZBTB16;FOLR1;SHCBP1;GPRC5C;CDCA7;EMG1;AP1S3;TPX2;BCCIP;ZBTB1;SPON2;PNRC1;COL4A1;CDC20;EHF;CTPS;TLR4;PRPS1;PPP1R16B;MCM3
SUZ12-18692474 (mouse)	62/1909	1.3553530805824175E-8	5.2246675203096415E-8	-0.5773716873163353	9.680958276874215	ROR1;PPAPDC1A;MMP28;PTX3;GRIK4;LRAT;NFE2L3;UCN;CDKN1C;FBXO32;LRRC8C;HS3ST2;FST;PLD5;HAS3;NRP1;CD14;SGPP2;CD83;CUEDC1;KCNK15;SIX1;HMGA2;HS3ST3A1;LEMD1;CHRNA5;LGALS3;PTHLH;CPD;PPL;LPL;TNXB;STAC2;VAMP5;P2RY2;NR4A2;ESX1;PTGER4;PRKCDBP;EPHA4;AMIGO2;ZBTB16;TMTC1;VIPR1;CORO2A;PRKCE;GPRC5C;TMEM158;ZBTB7C;LHFP;ERBB2;KCNK2;PCSK9;RASSF5;UNC5B;FBP1;FOSL1;COL4A1;CREB5;FJX1;FZD4;PPP1R16B
PPARG-20887899 (mouse)	110/3565	3.0133609281894776E-13	2.400644206124284E-12	-0.35383138517262624	9.466859196770248	DUSP10;HDAC4;FST;VRK1;NOP56;FOS;PECAM1;PGPEP1;RRM2;CAPN8;ANGPTL4;SCLT1;DEPDC6;FAM43A;IQCD;PIF1;CENPO;SERPINE1;F3;SH3PXD2A;ACSL1;IGBP1;GRAMD4;VSTM2L;BBOX1;KLF7;BCO2;AGPAT9;BCL6;ZC3H6;FOLR1;TUBA1C;PRKCE;UBE2C;DLC1;XRCC2;SELENBP1;CDCA7;HIST1H2BK;CDCA3;EMG1;RPS29;MICAL3;WWTR1;JAG1;FOSL1;ABCG1;YPEL5;SGOL2;SGOL1;KIF18A;ROR1;KBTBD8;SERF2;NDC80;MMP28;SORBS2;PTX3;TACC3;AHNAK;CD9;NRP1;NINL;GBP2;STAMBPL1;BM…
SMAD1-18555785 (mouse)	26/610	3.048809217652648E-6	8.096282255766475E-6	-0.7616536942298874	8.929708328390955	DLC1;SLC9A9;HIST1H2BK;MYBL2;HIST1H1D;HIST1H1B;HIST1H1A;ACSL1;MB;SIX1;IFITM1;HIST1H4B;HIST1H4C;HIST1H4D;PPM1F;UPP1;LEMD1;HAS2;EHF;DNMT1;TUBA1A;TUBA1C;MCM3;TXNIP;PECAM1;TCP11L2
SUZ12-20075857 (mouse)	134/4356	4.544443267090256E-16	5.172009242069387E-15	-0.2601165385075659	8.556667532476354	HSD11B2;DUSP10;PPAPDC1A;CDKN1C;FBXO32;E2F8;SCNN1B;DCLK1;FST;HAS2;HAS3;SLC25A23;SLC4A11;SGPP2;FOS;NIPAL4;CPLX3;CSGALNACT1;CUEDC1;AIF1L;CWH43;PVRL1;CYBRD1;EIF5A2;BEAN;SH2D5;NR3C2;HS3ST3A1;LEMD1;CHRNA5;FAM43A;PTHLH;TSHZ2;PPL;PTPRB;TNXB;F3;KDELR3;VAMP5;ESX1;GRAMD4;VSTM2L;KLF7;PPARA;AGPAT9;RAB11FIP4;AMIGO2;BCL6;TMTC1;FAM84A;FAM176A;PRKCE;GPRC5C;KCNK2;RASSF5;JAG1;UNC5B;DLG5;FOSL1;COL4A1;SYT1;DDIT4L;ROR…
EP300-21415370 (mouse)	34/1014	1.5082591198985003E-5	3.1900347757145274E-5	-0.821141539899794	8.501191031515184	NOXA1;ROR1;MMP28;SORBS2;PTX3;SLC8A1;PDK4;GRIK4;MB;AHNAK;BBOX1;KLF7;CRIP2;EPHA4;NRP1;FANCA;FOLR1;PLEKHA6;FOS;PRKCE;PECAM1;DLC1;BCL2L11;PCNA;SYTL2;AP1S3;MICAL3;PNRC1;HMGA2;COL4A1;ADAM19;YPEL5;PTHLH;PPP1R16B
DNAJC2-21179169 (human)	35/899	4.7425521549212373E-7	1.4531666218284305E-6	-0.6208606251984738	8.345462935579453	DUSP10;EPB41L1;RELT;P2RY2;AHNAK;GRAMD4;NFATC4;LMNB1;BCL6;SLC4A11;FOS;CD83;CD82;GPRC5C;TXNIP;CUEDC1;BCL2L12;PRODH;KCNK2;PCNA;DLG3;TSC22D3;CREB5;PTTG1;DZIP1L;FJX1;BEST2;TLR4;SGOL1;PPL;MSLN;PXMP4;INF2;CENPM;SLC10A7
RNF2-16625203 (mouse)	41/1219	1.8720232300699503E-6	5.142684505594461E-6	-0.6662652587601048	8.113735238792295	DCBLD2;YBX2;PTX3;PLSCR4;LRAT;PEG10;HIST1H4B;HIST1H4C;HIST1H4D;UCN;ESX1;CDKN1C;HIST1H3B;HIST1H3D;HIST1H3H;PTGER4;FST;NRP1;CD14;SGPP2;LMBRD1;CUEDC1;KIFC1;HIST1H2BK;BCL2L11;EIF5A2;HIST1H2AC;CDC45L;HIST1H2BE;HIST1H2AI;UNC5B;SIX1;LOXL3;HMGA2;COL4A1;AQP3;DDIT4L;FZD4;GTF2IRD2;LPL;HPS5
CREB1-15753290 (human)	29/957	3.276626365680316E-4	5.633911520846011E-4	-1.0479737431611913	7.840453713192995	SERF2;RECQL5;GTSE1;FANCD2;PRC1;EXO1;RAD51;BCL6;SNX1;BRCA1;FHIT;XRCC2;CCNA2;RPS29;PCNA;CDC45L;ORC6L;LOXL3;CDC25A;SFRS2;RFC3;HNRPDL;CPE;CPD;PRPS1;MCM6;CENPA;CENPE;CKS2
KDM6A-18722178 (human)	22/479	5.713498063217179E-6	1.3793192294029351E-5	-0.6951987565466639	7.780202453861308	CDCA8;INCENP;EMG1;RECQL5;PCNA;FANCD2;CDC45L;GINS1;KIF2C;KIF14;KIF15;EXO1;SMC2;RFC3;LETMD1;CDC20;RAD54B;SAP18;TROAP;TMEM87A;RAD51AP1;CENPF
SALL4-18804426 (mouse)	35/1006	5.306201410847243E-6	1.2940634052984603E-5	-0.6767578341754549	7.61700299937961	F3;TFPI;MYBL2;ELF3;CYP4X1;FST;ZBTB16;TTK;ALDH6A1;FOLR1;PLEKHA6;PRKCE;CUEDC1;CDCA7;CCNA2;BUB1;NID2;CMTM7;UNC5B;SPON2;SIX1;BMP2K;ANLN;ORC6L;B4GALT5;PNRC1;CCNL2;COL4A1;LGALS3;ADAM19;CTPS;TLR4;MCM10;PPP1R16B;PTPRB
SUZ12-18974828 (mouse)	62/1930	1.992065981971125E-8	7.439121401423419E-8	-0.443663572363222	7.282261930014496	MMP28;PTX3;CYP4X1;LRAT;NFE2L3;UCN;CDKN1C;FBXO32;LRRC8C;NRGN;HS3ST2;FST;PLD5;HAS3;NRP1;CD14;SPC25;SGPP2;CD83;PVRL1;KCNK15;SIX1;CLCF1;HMGA2;HS3ST3A1;CHRNA5;PTHLH;LPL;PTPRB;TNXB;STAC2;P2RY2;NR4A2;ESX1;PTGER4;PRKCDBP;EPHA4;PPARA;AMIGO2;ZBTB16;TMTC1;VIPR1;ITGB2;ITGA4;PRKCE;ZBTB7C;LHFP;KCNK2;PCSK9;RASSF5;UNC5B;FBP1;TIMP2;FOSL1;TSC22D3;COL4A1;AADAT;DZIP1L;FJX1;CBR3;DDIT4L;FZD4
NANOG-18358816 (mouse)	42/1232	1.0061257110547958E-6	2.8626672016916215E-6	-0.5543897417329401	7.076095824650184	GLUL;TFPI;ROR1;MYBL2;STAC2;HIST1H1B;CKAP2L;MB;NFE2L3;IFITM1;SYT17;UPP1;AURKB;HAS2;HAS3;BLNK;HMMR;PKMYT1;STAMBPL1;DEFB1;SACS;BRCA1;KIFC1;TUBB2C;CDCA2;CDCA3;CDC45L;NID2;FBP1;AKAP12;SUSD2;CBR3;HNRPDL;CHMP1B;ADAM19;CBX7;PRPS1;MSLN;CD274;MCM3;CENPA;CKS2
HIF1A-21447827 (human)	17/321	1.1696099073844072E-5	2.541243344226121E-5	-0.6670240907848047	7.057296309793739	SLC9A9;AKAP12;VRK1;ELF3;INHBA;BCCIP;P2RY2;ANGPTL4;NR4A2;PNRC1;PC;FOS;AHNAK;TMEM45A;PTPRB;SMC2;GDF15
MYCN-18555785 (mouse)	69/2261	2.1082733688431052E-8	7.75195900236157E-8	-0.3898198927377882	6.382417863127833	KBTBD8;SERF2;ANP32E;LRRC58;E2F7;LMNB1;ZWILCH;TYMS;RAD51AP1;MLF1IP;CCNA2;SPAG5;PVRL1;ODC1;MAOA;CCNE2;RRM2;EIF5A2;POLA2;CCNB1;CRAT;WIPI1;CCNL2;SMC4;DEPDC1B;AKAP12;HNRPDL;POLR2D;NUPR1;KLHL7;GTF2IRD2;CPE;SAP18;CENPM;STAG3;ESPL1;CRTC1;ACSL1;PNPLA7;P2RY2;KIF15;BIRC5;KIF20A;ALDH6A1;CCDC18;UBE2C;DLC1;RPS29;PCNA;TPX2;HIST1H2BE;NID2;ZBTB1;RBL1;ASS1;ORC6L;H2AFZ;SFRS2;CDC20;ABCG1;TOP2A;SGOL2;SGOL1;BBC3;HPS5;…
POU3F2-20337985 (human)	53/1702	5.664847509423046E-7	1.6873852789534375E-6	-0.47821396740416644	6.3565780563216405	ROS1;TFPI;KBTBD8;IL7R;PLSCR4;PLD5;STX19;NRP1;SPINK6;SACS;TMPO;LSM6;CCNA2;MAP2;CCNE2;DNM3;HMGA2;SMC4;AKAP12;HNRPDL;NALCN;PLAC8;TCP11L2;KLRC4;KLRC3;KLRC1;DCBLD2;NCAPG2;ABCA6;PEG10;HELLS;NR4A2;HIST1H3D;HIST1H3H;KIF23;CLDN8;TRDMT1;MME;ZC3H6;KLHL24;TMEM156;DLC1;HIST1H2BK;ZBTB1;ANLN;CREB5;SYT1;PTPN22;NAV3;RAD54B;COL11A1;SGOL2;CKS2
SOX2-18358816 (mouse)	30/785	4.429528221501107E-6	1.1027679634778797E-5	-0.5424739823590782	6.19239590357106	ROR1;TFPI;MYBL2;HIST1H1B;CKAP2L;IFITM1;HDAC4;UPP1;MME;CRIP2;EPHA4;HMMR;BMF;BRCA1;FOS;CDCA3;NID2;JAG1;PBK;H2AFX;ABCG1;SUSD2;CKB;HNRPDL;ADAM19;CBX7;PRPS1;MSLN;KIF18A;ANXA11
SETDB1-19884255 (mouse)	61/2020	2.0979613469840563E-7	6.775848134178236E-7	-0.4333536172548864	6.155671606992244	MYBL2;ANP32E;FANCD2;PLSCR4;OPLAH;IFITM1;AHNAK;CD9;SAA1;LMBRD1;VTCN1;TUBB2C;CD164L2;MAOA;EIF5A2;CLCF1;RARRES2;PDLIM7;LEMD1;DEPDC1B;AKAP12;SUSD2;CKB;POLR3G;NUPR1;TJP3;GTF2IRD2;SAP18;KPNA2;MTHFR;CENPA;STAG3;KDELR3;SH3PXD2A;HIST1H4B;HIST1H3B;SYT17;KIF14;GLDC;BIRC5;KIF20A;FXYD3;SHCBP1;TMEM158;GLRX;RPS29;PPFIBP2;PCSK9;ELAVL3;NID2;ASS1;ANLN;ABLIM2;H2AFZ;H2AFX;SFRS2;CBR3;CBX7;PAQR6;MSLN;MSI2
EOMES-21245162 (human)	35/932	1.0458718251131303E-6	2.9407454847298607E-6	-0.4802995589451033	6.1175022089941535	GLUL;TAGLN;TFPI;ELF3;KDELR3;IFITM1;HIST1H3H;AHNAK;HS3ST2;DCLK1;PRKCDBP;HAS2;NRP1;RAB11FIP4;FOLR1;CEP55;CDCA7;PPFIBP2;MAP2;PCNA;CMTM7;BMP2K;TSC22D3;SMC4;LEMD1;AKAP12;YPEL2;FZD4;CPD;PCCA;PPL;MCM7;MTHFR;INF2;CENPM
CLOCK-20551151 (human)	20/407	5.889107565840347E-6	1.3798987335645519E-5	-0.5282631869615326	5.911748607791164	RORC;SERPINE1;ERBB3;CEACAM1;KDELR3;SPON2;HMGB3;ANGPTL4;TSC22D3;COL4A1;PRKCDBP;SFRS2;CKB;ADAM19;YPEL3;BCL6;PRPS1;FOS;TUBA1A;CD82
TET1-21451524 (mouse)	61/1839	8.549150095058098E-9	3.4054114545314754E-8	-0.34198363120388503	5.880516254269148	HSD11B2;MMP28;CDR2L;YBX2;SNORA62;AHNAK;HS3ST2;CLSPN;CD14;BMF;TMPO;TXNIP;LSM6;TUBB2C;PVRL1;CCNE2;CYBRD1;ANGPTL4;CLCF1;SMC4;PDLIM7;CTNNBIP1;TJP3;LYNX1;ATP6V1B1;CENPM;SERPINE1;TCOF1;BNIPL;KDELR3;ST6GALNAC1;AZGP1;VAMP5;PEG10;PSMC3IP;SLC35E2;UPP1;HMGN2;SEPP1;RAB11FIP4;AMIGO2;VIPR1;ROBO4;ZC3H6;TUBA1A;CDCA3;ERBB2;PCNA;BCCIP;PCSK9;RASA4;ELAVL3;ASS1;ORC6L;FOSL1;CBR3;CTPS;CBX7;SPOCD1;PAQR6;PPP1R16B
FLI1-21571218 (human)	166/5834	5.481182458759739E-17	7.705897692021046E-16	-0.16767325439691005	5.834924544115773	DUSP10;ANP32E;FANCD2;HDAC4;FBXO32;FAM111B;PLEKHA6;TMPO;SGPP2;FOS;EML2;PECAM1;PGPEP1;PVRL1;MKI67;NOD2;EIF5A2;CAPN8;TMEM201;MAGOHB;PPM1F;ADAMTS13;SCLT1;SMC2;LEMD1;DEPDC1B;FAM43A;TMPRSS13;PTHLH;IQCD;DSCC1;SMTN;HJURP;CENPM;ANXA11;SERPINE1;KIF4A;NCAPG2;RECQL5;HIST1H1D;SH3PXD2A;AZGP1;IGBP1;VAMP5;HIST1H4L;HIST1H4B;NR4A2;KIF23;KIF2C;KIF14;GRAMD4;VSTM2L;GDF15;AURKB;KLF7;AGPAT9;ICAM2;MBD5;AMIGO2;TPCN1;TMTC…
TP53-16413492 (human)	18/449	2.031258009212363E-4	3.5960789940870725E-4	-0.7262273194964924	5.759343061800241	PGPEP1;PVRL1;KCNK2;PCNA;NID2;TRIM22;RBL1;IGBP1;HELLS;FBXO32;ALDH3A1;COL4A1;FST;NAV3;EHF;PCCA;PRKCE;MSI2
POU5F1-18700969 (mouse)	21/567	1.7765098142648187E-4	3.2165594364340274E-4	-0.7110640653127969	5.71839718111384	CDCA7;KCNK5;DUSP10;ELF3;WWTR1;IFITM1;PEG10;HMGA2;UPP1;NFATC4;PDLIM7;H2AFX;AKAP12;CKB;SEPP1;PRPS1;CORO2A;FOS;GPRC5C;TXNIP;KIF18A
GATA2-19941826 (human)	65/2410	3.534812305100944E-6	9.084087536764792E-6	-0.45653760957106687	5.299938853758095	DUSP10;MYBL2;IMPA2;AHNAK;CD9;CALML5;VRK1;CD59;CD14;FAM118A;FOS;CD83;CD82;BMP2K;TMEM217;RHBDL2;HS3ST3A1;ADAM19;TMPRSS13;TSHZ2;MTHFR;TCP11L2;GLUL;F3;CRTC1;TMEM110;ELF3;SH3PXD2A;EPB41L1;BST2;ABCA6;P2RY2;HIST1H4C;HIST1H4D;KIF2C;KIF14;GRAMD4;VSTM2L;GDF15;HMGN2;BBOX1;MME;TPD52L1;AGPAT9;SEPP1;ICAM2;RAB11FIP4;ZBTB16;CORO2A;TUBA1C;TMEM158;TGM1;DLC1;CDCA4;TNFSF10;DLG5;FAM102A;YPEL2;EHF;CTPS;SPOCD1;LAPTM5;B…
GATA1-19941827 (mouse)	58/1834	9.805479352847719E-8	3.4463375960744186E-7	-0.34352761245261987	5.1119600444007025	ROS1;RALGPS1;ANP32E;CYP4X1;LRRC8C;AHNAK;CRIP2;NRP1;RAD51;SLC25A23;PACS2;BLM;SACS;PLEKHA6;CD82;TXNIP;CUEDC1;ODC1;GRAMD1C;EIF5A2;DNM3;BMP2K;B4GALT5;WIPI1;FRMD5;HS3ST3A1;DEPDC1B;ADAM19;POLR3G;CPD;MTHFR;PTPRB;CENPO;ANXA11;RECQL5;BNIPL;RELT;VAMP5;UPP1;VSTM2L;ICAM2;RAB11FIP4;ZBTB16;PHGDH;ITGA4;DNMT1;PRKCE;CDCA4;AP1S3;MICAL3;BCCIP;ANLN;GINS4;PTPN22;EHF;PCCA;ATAD5;CD274
TFAP2A-17053090 (human)	59/1904	1.469071855937073E-7	4.945185543224796E-7	-0.3463992008734867	5.029605952565664	TAGLN;HSD11B2;SERF2;MMP28;CDR2L;CDKN1C;IMPA2;AHNAK;NRGN;SCNN1B;LETMD1;CD59;RAD51;SLC37A2;BMF;SACS;BRCA1;EML2;CPAMD8;CD82;SYTL2;HMGB3;CCNL2;CKB;KRT9;PTPRB;TCP11L2;ESPL1;CRTC1;SERPINA3;KDELR3;EPB41L1;MB;ABCA6;PC;KIF23;AMIGO2;ZBTB16;ALDH6A1;GPRC5C;CDCA3;PCNA;MICAL3;DLG3;TSC22D3;COL4A1;SYT1;GCNT3;ABCG1;TOP2A;CBR3;CHMP1B;CDKN3;TLR5;PPP1R16B;CASC5;CTSC;KIF18A;CYP4F8
HOXB4-20404135 (mouse)	54/1824	1.923442009992636E-6	5.223893640775455E-6	-0.41298681585489816	5.022856139107796	SERF2;ANP32E;ERCC6L;NRGN;CLSPN;RAD51;RIOK3;BLM;CCNDBP1;PECAM1;CCNE2;POLA2;CDC45L;SIX1;BMP2K;POLE2;PLK4;IFIT2;DEPDC1B;DEPDC6;HNRPDL;CPD;PXMP4;CENPA;TCP11L2;INCENP;ELF3;PDK3;NR4A2;HIST1H3D;HIST1H3H;KIF2C;TRAPPC6A;FANCA;HMMR;PHGDH;KLHL24;TMEM87A;CDCA2;ERBB3;HIST1H2AC;BUB1;HIST1H2BE;ASPM;PNRC1;CDC25A;PTPN22;POLQ;TOP2A;SGOL1;HPS5;MCM3;RACGAP1;CKS2
CHD1-19587682 (mouse)	31/843	6.449504390543422E-6	1.4821457205191134E-5	-0.4269900694870683	4.747888159340249	INCENP;MYBL2;CKAP2L;ERCC6L;HIST1H3B;HIST1H3H;IMPA2;NFATC4;KLF7;FANCA;RAD51;ZWILCH;KIF20A;CEP78;TXNIP;RAD51AP1;CDCA8;CDCA3;SKP2;PCNA;RRM2;CCNB1;POLE2;PNRC1;TMEM45A;SCLT1;NUPR1;CBX7;PIF1;KPNA2;CENPA
WT1-19549856 (human)	13/199	1.5955708655449547E-5	3.345100323379335E-5	-0.4369182966709421	4.502630388933106	DLC1;MAOA;PCNA;NRP1;ANP32E;RRM2;WWTR1;RASSF5;GTF2IRD2;SIX1;GABARAPL1;TSC22D3;CENPF
SCL-21571218 (human)	58/1784	3.971192917897559E-8	1.4165897125037562E-7	-0.2820027122854494	4.447138576924275	MYBL2;MMP28;GRIK4;OPLAH;TACC3;HDAC4;IMPA2;NRGN;CD9;FAM111B;CD14;RIOK3;TMPO;PECAM1;SLC9A9;PVRL1;ODC1;FAM167A;CCNB1;WIPI1;RARRES1;PTTG1;DEPDC1B;C6ORF132;ADAM19;TMPRSS13;MTHFR;PLAC8;INCENP;GLUL;HIST1H1A;EPB41L1;ACSL1;GRAMD4;TUBA4A;KLF7;ICAM2;RAB11FIP4;ZBTB16;TPCN1;CORO2A;GPRC5C;PPFIBP2;UMODL1;CMTM7;UNC5B;NEIL1;TIMP2;TNFSF10;TSC22D3;ABCG1;YPEL2;SPOCD1;FAM72A;LAPTM5;C17ORF108;MSI2;CYP4F8
SPI1-20517297 (human)	42/1249	1.4074724081856668E-6	3.911464018097377E-6	-0.2800483724703304	3.4870499855575368	RORC;ESPL1;TCOF1;SERPINA5;MB;HIST1H4C;HDAC4;HIST1H3B;IMPA2;AHNAK;CD9;LMNB1;KRT34;CD14;CEP78;PACS2;DNMT1;CCNDBP1;TMEM61;CPAMD8;CDCA8;PGPEP1;PVRL1;SYTL2;TPX2;BEAN;HIST1H2AL;FLJ35390;FBP1;ADAMTS13;FAM102A;ABCG1;YPEL3;MCM10;LOC81691;PTHLH;DSCC1;HIST2H3A;LPL;PIF1;HPS5;MCM6
ERG-20887958 (mouse)	63/1969	1.7501935446877218E-8	6.639623129847072E-8	-0.19058440381767094	3.1499076599917037	DUSP10;MYBL2;KBTBD8;GTSE1;ANP32E;PLSCR4;TACC3;IMPA2;E2F7;DHFR;CLSPN;TTK;CCNDBP1;LMBRD1;CEP55;ODC1;RRM2;SH2D5;SMC2;IFIT2;FAM43A;FAM54A;TIPIN;CENPA;ANXA11;GLUL;TMEM110;HIST1H1D;HIST1H1A;ACSL1;HIST1H4B;HIST1H4C;HIST1H4D;HIST1H3D;AURKB;RAB26;LPAR6;BCO2;TRAPPC6A;AGPAT9;PKMYT1;VIPR1;TMEM80;ITGA4;KLHL24;PSRC1;CDCA7;RASA4;HIST1H2AI;ZBTB1;ASPM;ORC6L;GINS1;PTPN22;H2AFX;SFRS2;FAM102A;ABCG1;CHMP1B;FAM72A;PRP…
JUN-21703547 (human)	48/1585	4.083490754475403E-6	1.0273203055996013E-5	-0.26182433537037103	3.007306905895343	KBTBD8;FANCD2;PTX3;E2F7;CD9;PLD5;SLC16A4;ODC1;MAOA;CDC45L;BMP2K;RHBDL2;PPM1F;NR3C2;DEPDC1B;FAM54A;HNRPDL;PTHLH;CPE;SERPINE1;ZNF519;CRTC1;TCOF1;STAC2;INHBA;PRC1;NR4A2;PTGER4;EXO1;KLF7;BCL6;TMTC1;PRKCE;PCNA;BCCIP;ABLIM2;COL4A1;CDC25A;SYT1;NAV3;DZIP1L;TOP2A;CHMP1B;YPEL5;TLR4;MCM10;SGOL1;KIF18A
GATA2-21666600 (human)	28/837	8.736152556200215E-5	1.6703523687454814E-4	-0.33983291339576754	2.95563075802218	KLRC3;SERPINE1;TFPI;SORBS2;PLSCR4;VAMP5;HIST1H4D;CD59;ICAM2;ZG16B;ROBO4;GBP2;FOS;TXNIP;CSGALNACT1;XRCC2;BCL2L11;ADAMTS6;PPFIBP2;PCSK9;TNFSF10;ANO4;TLR4;PPP1R16B;GABARAPL1;ARL13B;PTPRB;ANXA11
LMO2-20887958 (mouse)	55/1741	2.2132753642982305E-7	7.052970827563695E-7	-0.1567935204979949	2.220924827236988	NDC80;CDR2L;IMPA2;LRRC8C;E2F8;NRGN;GBP2;BRCA1;SLPI;TXNIP;MLF1IP;CUEDC1;MKI67;EIF5A2;BMP2K;TMEM217;ANGPTL4;CLCF1;SMC2;DEPDC1B;NUPR1;GTF2IRD2;MTHFR;CENPO;ELF3;HIST1H1B;RELT;PTGER4;UPP1;GRAMD4;TUBA4A;KLF7;TPD52L1;BCO2;AGPAT9;ICAM2;ITGB2;TMEM87A;ZBTB7C;SELENBP1;HIST1H2BK;ERBB2;BCCIP;HIST1H2BE;CMTM7;FBP1;PNRC1;H2AFZ;PPP1R16B;LAPTM5;ATAD5;CD274;HPS5;MCM3;MCM6
FOXP3-21729870 (human)	46/1404	8.746603342507581E-7	2.5388399132897374E-6	-0.1535591882931885	1.978426378154206	DUSP10;HIST1H1D;IL7R;TACC3;HIST1H4B;HIST1H4C;HIST1H4D;NR4A2;KIF14;KIF15;TRDMT1;TUBA4A;HNRNPA3;TRAPPC6A;MBD5;BCL6;SLC25A23;BMF;DNMT1;FOS;PRKCE;TXNIP;MLF1IP;LSM6;EMG1;ARHGAP11B;UMODL1;BCCIP;PLK1;MAGOHB;NR3C2;PTPN22;H2AFX;RFC3;POLQ;FAM43A;XKRX;POLR3G;TJP3;ATAD5;MCM3;HJURP;CENPM;SLC10A7;CENPE;TCP11L2
SPI1-20176806 (mouse)	52/1654	5.5283221885125E-7	1.672492408929731E-6	-0.13133459107489834	1.746907082793907	CDR2L;CCDC64B;AHNAK;HS3ST2;CD9;CD14;SPC25;STAMBPL1;SACS;TMPO;CCNDBP1;NIPAL4;CD82;CPLX3;CSGALNACT1;CLCA2;BCL2L11;NOD2;FAM167A;MAGOHB;S100A9;AQP3;IQCD;CENPO;TNXB;KLRC3;SERPINE1;F3;AZGP1;CASP1;KIF14;AURKB;LPAR6;SEPP1;BIRC5;PHGDH;ITGB2;ZC3H6;TUBA1C;GPRC5C;EMG1;LHFP;CCDC99;ZBTB1;LOXL3;RAD54B;CDKN3;DRAM2;PAQR6;ENTPD8;ATAD5;RACGAP1
TP53-18474530 (human)	30/827	1.1646509072727195E-5	2.541243344226121E-5	-0.15909549035572207	1.683273561635865	INCENP;PPAPDC1A;TRIM22;E2F7;FST;PLD5;EPHA4;NRP1;AMIGO2;FAM84A;PRKCE;CD83;PVRL1;PCNA;ZNF219;AP1S3;PCSK9;DNM3;CMTM7;JAG1;TNFSF10;ALDH3A1;GCNT3;EHF;TP53INP1;LAPTM5;BBC3;SLC10A7;CENPE;PLAC8
SMAD4-19686287 (human)	17/405	1.8092706457840667E-4	3.251245746935278E-4	-0.1669119288985685	1.3405201321432532	HIST1H2BK;SERPINE1;ADAMTS6;SYTL2;PLCXD2;TUBB;CLCF1;CASP1;HS3ST2;UPP1;EXO1;FST;CD59;NALCN;PTHLH;ITGA4;SLC4A11
ERG-21242973 (human)	15/321	1.4255274523159768E-4	2.620777393103988E-4	-0.16045810220303194	1.323277010358867	MAOA;FAM43A;RAB11FIP4;PCSK9;NID2;CD14;LRAT;CDKN1C;HDAC4;SLC4A11;FAM84A;GPRC5C;UPP1;SCNN1B;VSTM2L
DACH1-20351289 (human)	51/1698	2.5367870319809252E-6	6.812270793746529E-6	-0.09949249965767398	1.1836408818674022	NOXA1;ATP6AP1L;OPLAH;NFE2L3;HDAC4;IMPA2;E2F7;GAA;LMNB1;LETMD1;STAMBPL1;TMPO;TXNIP;TUBB2C;SIX1;B4GALT5;HMGA2;B3GALT4;FAM54A;IQCD;DSCC1;ANXA11;DCBLD2;HIST1H3B;PSMC3IP;KIF11;PRKCDBP;KLF7;EPHA4;TMEM80;ZC3H6;DNMT1;TUBA1C;FAM83E;PRKCE;CDCA7;HIST1H2BK;CDCA3;SKP2;WDR62;TRIP13;ZBTB1;TIMP2;FOSL1;H2AFX;SFRS2;C11ORF54;THBS3;HPS5;CTSC;CKS2
RUNX1-17652178 (human)	31/1003	1.4813824978217427E-4	2.702674938774019E-4	-0.12981146316126735	1.0665437510603815	RORC;SERPINE1;HIST1H1B;SLC8A1;HELLS;NR4A2;HIST1H3B;FST;HAS3;CSTA;STAMBPL1;ITGA4;RAD51AP1;TUBB2C;CDCA7;MKI67;ZNF219;HIST1H2AC;BUB1;RASSF5;HIST1H2AL;NEIL1;NR3C2;PTPN22;AQP3;H2AFX;NAV3;STAU2;SGOL1;PPP1R16B;CASC5
GATA4-21415370 (mouse)	56/2039	1.056671258060975E-5	2.3383743581164168E-5	-0.09374802400662345	0.9996791942845786	MYBL2;ANP32E;SORBS2;PLSCR4;E2F7;GAA;LETMD1;CRIP2;RAD51;BMF;PLEKHA6;FOS;TYMS;MLF1IP;TUBB2C;CCNA2;ADAMTS6;ODC1;MKI67;SYTL2;CCNE2;CYBRD1;IFIT2;CPE;PIF1;ANXA11;F3;ACSL1;SLC8A1;PDK4;BST2;HELLS;KIF2C;TUBA4A;EPHA4;FANCA;BCL6;PHGDH;ITGB2;KLHL24;PRKCE;TMEM159;DLC1;MICAL3;RBL1;ASS1;ANLN;GINS1;H2AFZ;RFC3;UHRF1;POLQ;ATAD5;CD274;MCM7;RACGAP1
NANOG-18555785 (mouse)	20/542	2.628903030693397E-4	4.58618849880089E-4	-0.07496467758373052	0.5762752977009461	TUBB2C;DUSP10;MYBL2;KBTBD8;RECQL5;NID2;UPP1;H2AFZ;H2AFX;SFRS2;HAS3;MME;TOP2A;CHMP1B;DEFB1;LMBRD1;MCM3;UBE2C;ANXA11;CKS2
STAT3-1855785 (mouse)	21/572	1.99113646171395E-4	3.5513553309674185E-4	-0.06078162420222948	0.4827891131602013	DLC1;SERPINE1;CCNA2;WFDC2;PRODH;MYBL2;ODC1;NOD2;HIST1H1A;PDK4;OPLAH;HELLS;UPP1;GLDC;CKB;BCL6;NUPR1;TTK;BBC3;FOS;KLHL24
NFE2L2-20460467 (mouse)	36/1055	5.881951283920406E-6	1.3798987335645519E-5	-0.04060693634095963	0.45442878721324415	SERPINE1;F3;TFPI;ACACB;CKAP2L;SORBS2;PTX3;CD9;PRKCDBP;HAS2;TPD52L1;BCL6;SNX1;ITGB2;SLPI;TMEM159;MAOA;RASA4;JAG1;UNC5B;MAGOHB;COL4A1;FAM102A;POLQ;FJX1;FAM43A;CBR3;YPEL5;EHF;CDKN3;NALCN;SGOL2;LPL;GABARAPL1;INF2;MUC20
NRF2-20460467 (mouse)	36/1055	5.881951283920406E-6	1.3798987335645519E-5	-0.04060693634095963	0.45442878721324415	SERPINE1;F3;TFPI;ACACB;CKAP2L;SORBS2;PTX3;CD9;PRKCDBP;HAS2;TPD52L1;BCL6;SNX1;ITGB2;SLPI;TMEM159;MAOA;RASA4;JAG1;UNC5B;MAGOHB;COL4A1;FAM102A;POLQ;FJX1;FAM43A;CBR3;YPEL5;EHF;CDKN3;NALCN;SGOL2;LPL;GABARAPL1;INF2;MUC20
IRF8-21731497 (mouse)	14/319	4.294960813362986E-4	7.079280237198302E-4	-0.017149630193588183	0.1243891511760155	CDCA7;KLF7;RECQL5;CLSPN;PHGDH;TLR4;GBP2;STAMBPL1;ERCC6L;PNRC1;CD274;CASP1;CCDC106;SLC10A7
TRIM28-17542650 (human)	22/3568	0.9999997108374276	0.9999997108374276	3.9706414003029176	-1.148161047559536E-6	VRK1;SGPP2;FHIT;HGD;IGBP1;KIF2C;UPP1;EPHA4;XRCC2;ERBB3;AP1S3;JAG1;UNC5B;TLR5;IMPA2;CD9;BMF;SIX1;STAG3;INHBA;SKP2;FAM3D
STAT6-20620947 (human)	18/508	8.203700683738532E-4	0.001289923989087835	0.009039244414934512	-0.060139647711821786	FHIT;IL7R;RASSF5;HDAC4;C1ORF112;PTPN22;TUBA4A;AES;RAB11FIP4;YPEL5;HMMR;BCL6;DLGAP5;CD14;SNX1;ITGB2;MSI2;ANXA11
GABP-17652178 (human)	10/1001	0.9241009938632236	0.9279837711483633	1.5185925815766936	-0.11350118028130571	RECQL5;IGBP1;C1ORF112;ZWILCH;RIOK3;RAD51AP1;EMG1;ERBB2;TRIP13;SGOL2
MYB-21317192 (mouse)	32/923	1.4298420749474318E-5	3.0511808563610373E-5	0.013080476936910444	-0.13600290882734345	STAC2;ANP32E;ACSL1;RELT;VAMP5;HDAC4;VRK1;KLF7;ICAM2;AMIGO2;BCL6;CEP78;BLM;ITGA4;SLPI;GLRX;PECAM1;CDCA4;BCL2L11;MKI67;RRM2;CMTM7;BMP2K;ANLN;WIPI1;H2AFX;RAD54B;PRPS1;PRPS1L1;CD274;MCM6;PLAC8
SMAD3-21741376 (human)	40/1460	2.0649060891329908E-4	3.628768788991065E-4	0.01936965967665236	-0.1534357317196129	GLUL;ROR1;RALGPS1;SH3PXD2A;IGBP1;ESX1;AHNAK;HS3ST2;DCLK1;FST;KLF7;EPHA4;AGPAT9;MBD5;ZBTB16;TMTC1;CD83;CEP55;CUEDC1;DLC1;CCDC99;ODC1;FAM167A;HMGA2;HS3ST3A1;NAV3;CYP4B1;LOC375295;YPEL2;EHF;DDIT4L;CDKN3;FZD4;TLR4;TLR5;CPE;PPP1R16B;BBC3;CTSC;MUC20
POU5F1-18555785 (mouse)	20/555	3.519737284807195E-4	6.008694364777997E-4	0.026822926681178447	-0.19894921171521665	HIST1H2BK;STAG3;RECQL5;NID2;WIPI1;HS3ST2;UPP1;B3GALT4;SFRS2;LMNB1;ABCG1;YPEL5;POLR2D;CEP78;BRCA1;DNMT1;LMBRD1;RAD51AP1;MLF1IP;ANXA11
YY1-21170310 (mouse)	5/464	0.81383301338921	0.8207008025317349	1.8205903286824672	-0.3597425799815249	CAPN8;DEPDC6;THBS3;GTF2IRD2;CASC5
REST-19997604 (mouse)	28/2118	0.7499212465840477	0.7594541437863872	2.149059890262559	-0.5913252953594531	LETMD1;CEP78;TMPO;SGPP2;LMBRD1;CUEDC1;CCNA2;ODC1;POLA2;HS3ST3A1;CHRNA5;TMEM110;SERPINA5;SPRR3;HIST1H4C;HIST1H4D;WISP2;BCL6;KLHL24;HIST1H2AC;HIST1H2BE;ZBTB1;JAG1;TSC22D3;H2AFX;CTPS;TLR4;MCM6
MYCN-19997598 (human)	3/234	0.6722043683958194	0.6836461448791525	1.7809587923486612	-0.6773250354870736	TRIP13;FAM72A;TNXB
LYL1-20887958 (mouse)	26/752	9.336921800922583E-5	1.7710510400162677E-4	0.07967773298616931	-0.6883173857897706	ACACB;KCNK2;CDR2L;YBX2;CAPN8;RELT;LRRC8C;E2F8;NRGN;UPP1;DEPDC1B;TPD52L1;ICAM2;NUPR1;TLR5;GTF2IRD2;IQCD;LAPTM5;ATAD5;BRCA1;HPS5;MCM3;HJURP;TXNIP;MLF1IP;CUEDC1
KLF1-20508144 (mouse)	37/1144	1.368181928539088E-5	2.9459052335210998E-5	0.08100377004250871	-0.8450725855424653	F3;ACACB;PLCXD2;PTX3;PNPLA7;VAMP5;LRRC8C;PTGER4;HAS2;VRK1;EPHA4;ZBTB16;TUBA1C;CD82;CCNA2;CD164L2;CCDC99;TPX2;HN1;SIX1;BMP2K;B4GALT5;WIPI1;ABLIM2;SMC2;SYT1;AQP3;DEPDC1B;NAV3;LGALS3;TLR4;CBX7;FAM72A;PAQR6;PRPS1L1;HJURP;CENPM
GATA2-21571218 (human)	36/1111	1.7196937432269223E-5	3.5739722141846475E-5	0.08602762993589923	-0.8808582225126746	SERPINE1;DUSP10;SH3PXD2A;SORBS2;SLC8A1;P2RY2;HIST1H4D;AHNAK;KIF14;HMGN2;ZG16B;BLM;TMEM80;DEFB1;FOS;TXNIP;CSGALNACT1;DLC1;PPFIBP2;ZNF219;UMODL1;POLA1;TRIP13;UNC5B;ASS1;TNFSF10;ABLIM2;IFIT2;RARRES1;ABCG1;CDKN3;MCM3;LOC90246;MSI2;INF2;MUC20
GATA1-19941826 (human)	28/967	8.114166604179389E-4	0.0012842952439727643	0.13424758612652266	-0.8937593671721192	GLUL;CRTC1;ELF3;SH3PXD2A;EPB41L1;HIST1H4D;VSTM2L;GDF15;HMGN2;VRK1;CD59;AGPAT9;SEPP1;ICAM2;FAM118A;FOS;TUBA1C;CD83;TGM1;DLC1;HS3ST3A1;ADAM19;CTPS;SPOCD1;TSHZ2;LAPTM5;MTHFR;TCP11L2
ZIC3-20872845 (mouse)	14/365	0.0014888050124853445	0.0022520531517974517	0.1660090358949214	-1.0119766345413448	DDAH2;DEPDC6;ROR1;VRK1;HIST1H1B;NID2;ZBTB1;FBXO32;HIST1H3H;KIF23;UPP1;TXNIP;ANXA11;CUEDC1
FOXP3-17237761 (mouse)	4/257	0.5276400026884417	0.538914361720246	1.6833595418359617	-1.0406505193526017	NRP1;BCL6;ZBTB1;RBL1
STAT3-20064451 (mouse)	39/2202	0.1431578110997401	0.15840146691128648	0.6990806122560838	-1.2881416926099072	DUSP10;IL7R;CCDC64B;HDAC4;LRRC8C;AHNAK;AES;GBP2;BLM;TMPO;FOS;CD83;TXNIP;SLC9A9;B4GALT5;TMPRSS13;CPD;SAP18;CENPF;PLAC8;INCENP;KLRC1;PLCXD2;INHBA;P2RY2;HELLS;KIF11;PTGER4;TRDMT1;BCL6;PHGDH;KLHL24;TMEM158;GLRX;KCNK2;ZBTB1;PRPS1;ARL13B;MCM3
TP63-19390658 (human)	3/179	0.49503911979189874	0.507786908284394	1.9756609840135084	-1.338892392290928	NR4A2;NFATC4;POLR3G
ELK1-19687146 (human)	28/917	3.676507277470134E-4	6.231810207910369E-4	0.18605800468746186	-1.373233388067207	TFPI;IGBP1;HIST1H4C;AHNAK;PTGER4;CD9;C1ORF112;AMIGO2;ZWILCH;RIOK3;CCDC18;DNMT1;KIFC1;HIST1H2BK;EMG1;BCL2L12;ADAMTS6;SYTL2;TPX2;CDC45L;PLK4;FOSL1;CHRNA5;POLQ;C11ORF54;CTNNBIP1;SGOL2;RACGAP1
FOXP2-21765815 (mouse)	18/1164	0.4552855276395297	0.46902259097348104	1.8186173513711985	-1.3768830955401787	INHBA;NFE2L3;ABCA6;HIST1H3H;LMNB1;BIRC5;KIF20A;ROBO4;BCL2L11;SYTL2;ASS1;CCNL2;PTTG1;LGALS3;DDIT4L;TMPRSS13;SGOL2;LPL
TFEB-21752829 (human)	27/808	1.1819498997887465E-4	2.2069220785118001E-4	0.17520825618531527	-1.4750330265734808	SERF2;ELF3;LRRC58;HDAC4;PC;GAA;HNRNPA3;BCL6;TUBA1C;TXNIP;HIST2H2AA4;ADAMTS6;C15ORF62;NOD2;EIF5A2;CCNB1;SH2D5;ANLN;H2AFZ;DEPDC1;TP53INP1;SGOL1;SPOCD1;GABARAPL1;HPS5;MTHFR;CENPM
RNF2-18974828 (mouse)	40/1298	1.7953788633912134E-5	3.667483319235043E-5	0.14470349849641964	-1.477917574098531	STAC2;SH3PXD2A;LRAT;UCN;NR4A2;ESX1;CDKN1C;FBXO32;PTGER4;NRGN;HS3ST2;FST;PRKCDBP;HAS2;EPHA4;NRP1;ZBTB16;TMTC1;SGPP2;PRKCE;CD83;GPRC5C;ZBTB7C;BCL2L11;KCNK2;KCNK15;JAG1;UNC5B;SIX1;CLCF1;HMGA2;TSC22D3;COL4A1;HS3ST3A1;CHRNA5;FJX1;FZD4;PTHLH;LPL;TNXB
EZH2-18974828 (mouse)	40/1298	1.7953788633912134E-5	3.667483319235043E-5	0.14470349849641964	-1.477917574098531	STAC2;SH3PXD2A;LRAT;UCN;NR4A2;ESX1;CDKN1C;FBXO32;PTGER4;NRGN;HS3ST2;FST;PRKCDBP;HAS2;EPHA4;NRP1;ZBTB16;TMTC1;SGPP2;PRKCE;CD83;GPRC5C;ZBTB7C;BCL2L11;KCNK2;KCNK15;JAG1;UNC5B;SIX1;CLCF1;HMGA2;TSC22D3;COL4A1;HS3ST3A1;CHRNA5;FJX1;FZD4;PTHLH;LPL;TNXB
TP53-20018659 (mouse)	34/1123	1.051336495005492E-4	1.9784993882386817E-4	0.17556539166185678	-1.497221958437168	TMEM110;GTSE1;P2RY2;NR4A2;ESX1;CDKN1C;E2F7;PTGER4;KIF15;GDF15;FST;ZBTB16;BIRC5;CD14;SGPP2;FOS;TGM1;ZBTB7C;PSRC1;TUBB2C;MICAL3;RRM2;UNC5B;SPON2;SIX1;ASS1;FOSL1;HMGA2;COL4A1;HS3ST3A1;DDIT4L;PTHLH;BBC3;PLCD4
HTT-18923047 (human)	10/566	0.33036131055554646	0.3462997948367351	1.4555559276438912	-1.5435448948291732	KLRC3;CLCA2;SLC8A1;CCNB1;MB;PLK4;TMEM45A;VRK1;HMMR;SACS
ZNF274-21170338 (human)	6/327	0.3564975271192184	0.37044743035431826	1.585458794370358	-1.5744299191964652	CWH43;RPS29;CEACAM1;TPX2;PRPS1L1;SULT2B1
POU5F1-16518401 (mouse)	26/1550	0.28315862822210425	0.2981273662778983	1.3583229333185807	-1.6438892491085266	MYBL2;LMNB1;VRK1;GBP2;SLC9A9;DDAH2;SIX1;PADI2;HMGA2;AKAP12;SLC27A1;CKB;ADAM19;SAP18;PDK4;UPP1;EPHA4;ERBB3;ERBB2;PPFIBP2;BUB1;JAG1;RBL1;ASS1;H2AFZ;TOP2A
EGR1-19032775 (human)	11/276	0.0034896618312266854	0.004935083891498094	0.3555352211744509	-1.8883846565100424	GLUL;KCNK2;MAP2;SLC8A1;RELT;GBP2;ORC6L;BMF;BBC3;CASP1;SLPI
PDX1-19855005 (mouse)	21/669	0.0013831341989944314	0.002105535500380058	0.3139179327083886	-1.934734435274756	PCNA;BCCIP;CDC45L;PCSK9;NEIL1;TACC3;SYT1;DEPDC1B;AKAP12;POLQ;BLNK;SLC27A1;KIF20A;ALDH6A1;ZC3H6;GABARAPL1;CCNDBP1;FOS;MCM7;TMEM159;TCP11L2
MEIS1-20887958 (mouse)	44/1452	1.0209357198483865E-5	2.2804078228389194E-5	0.18288784894741683	-1.9548097892977927	YBX2;CEACAM1;PNPLA7;KDELC1;TMEM38A;SLC35E2;TMC4;TPD52L1;PKMYT1;CCDC18;ITGB2;ZC3H6;LMBRD1;GLRX;TXNIP;MLF1IP;SLC9A9;KIFC1;SELENBP1;BCL2L11;SPAG5;RPS29;TLE2;RHOV;PADI2;HMGA2;CCNL2;SMC4;DEPDC1B;RFC3;FAM43A;FAM54A;NUPR1;KLHL7;IQCD;LAPTM5;BBC3;HPS5;MTHFR;HJURP;INF2;CENPM;KIF18A;TCP11L2
EST1-17652178 (human)	19/1001	0.16517538570919144	0.1810867760756732	1.1634888897771238	-1.9881453080190492	INCENP;ESPL1;KBTBD8;RECQL5;IGBP1;KIF15;EXO1;C1ORF112;LETMD1;RAD51AP1;EMG1;RPS29;ZNF219;BCCIP;RBL1;FAM54A;CASC5;MCM3;RACGAP1
CHD7-19251738 (mouse)	3/141	0.34924578242572907	0.3644966899552369	1.989499034999677	-2.007877646355069	SELENBP1;SERF2;CRAT
NANOG-18700969 (mouse)	9/344	0.07499631000979597	0.08829614823813416	0.8430248223296579	-2.046070808288491	STAG3;GLUL;AKAP12;ABCG1;WWTR1;UNC5B;IFITM1;HMGA2;UPP1
CTNNB1-20615089 (human)	14/637	0.09686666187504997	0.10972100563098076	0.968106837789477	-2.139336476894663	EMG1;RASA4;HDAC4;PLK1;DLG5;NRGN;CD9;ABCG1;ALDH6A1;FAM72A;PRPS1;PLEKHA6;MCM7;INF2
NANOG-16518401 (mouse)	62/3520	0.08798278179657829	0.10061188923149383	0.9403719380492235	-2.159549904472255	MYBL2;IFITM1;TMEM38A;LETMD1;PLEKHA6;PECAM1;PVRL1;B4GALT5;DEPDC6;HNRPDL;TMPRSS13;ESX1;KIF14;UPP1;NFATC4;KLF7;EPHA4;RAB11FIP4;XRCC2;CDCA7;KCNK5;CDCA2;CDCA3;AP1S3;NEIL1;TMEM45A;SYT1;H2AFZ;H2AFX;SFRS2;TLR4;BBC3;MCM3;MCM6;KIF18A;ROR1;IMPA2;CD9;LMNB1;GBP2;SACS;CD83;SLC9A9;BCL2L11;POLA1;SIX1;HMGB3;AKAP12;ADAM19;CPE;INHBA;PDK4;PEG10;HELLS;GLDC;MME;SKP2;TPX2;CDC25A;FJX1;MCM10;CBX7
MYC-18940864 (human)	24/746	4.681919089795714E-4	7.612099744633849E-4	0.3065894872243501	-2.2014968763620923	CDCA2;CCDC99;HIST1H2AC;HIST1H2AI;PNPLA7;GINS2;KIF23;ADAMTS13;AQP3;RAB26;LMNB1;FAM54A;TRAPPC6A;POLR2D;POLR3G;KIF20B;LOC81691;ROBO4;SGOL2;SGOL1;SPOCD1;HIST2H3A;MCM7;TXNIP
SCL-19346495 (human)	11/252	0.001785207215647197	0.0026175737701820863	0.3734090534088831	-2.220106302280613	DEPDC1B;ODC1;PKMYT1;TMPRSS13;BLM;HMGA2;CD83;NRGN;CD9;INF2;CUEDC1
ETS2-20176728 (mouse)	5/215	0.2180900975019687	0.23269434510254697	1.6030459315068646	-2.3372882743502146	KLF7;KDELR3;NFATC4;MUC20;MLF1IP
CDX2-20551321 (human)	16/504	0.0044123841368312045	0.006060688555762402	0.46252908635900414	-2.3616419992774427	DLC1;BCL2L11;PRODH;PVRL1;RPS29;ELF3;GRIK4;UNC5B;RBL1;P2RY2;WISP2;DLG5;CD9;PLD5;SULT2B1;MSI2
ERG-20517297 (human)	34/1062	3.699891834944331E-5	7.308050814476819E-5	0.2484363850512111	-2.366095429473202	BNIPL;SPRR3;ACSL1;PC;CLDN8;PTGER4;CALML5;SCNN1B;HMGN2;LETMD1;PPARA;DLGAP5;CCNDBP1;TUBA1C;LHFP;POLA2;CMTM7;FBP1;CECR4;BMP2K;MAGOHB;FOSL1;COL4A1;CREB5;PTPN22;FAM54A;STAU2;NALCN;TMPRSS13;CPD;DSCC1;TIPIN;HRASLS2;ATAD5
EOMES-20176728 (mouse)	49/1744	2.1938085887846184E-5	4.4060525438615444E-5	0.23891793047750337	-2.396334010678855	ANP32E;GRIK4;LRRC58;PLD5;SLC25A23;TMPO;LMBRD1;SLPI;TXNIP;ODC1;SYTL2;RRM2;B4GALT5;WIPI1;SMC4;PTTG1;LGALS3;ADAM19;PPL;GABARAPL1;SMTN;KRT9;BNIPL;CNDP1;PNPLA7;HIST1H4B;HELLS;HIST1H3H;KIF11;BLNK;KLF7;EPHA4;TMEM80;FOLR1;DLC1;CDCA7;KCNK5;CDCA3;MICAL3;PCSK9;UNC5B;ANLN;H2AFZ;SFRS2;CTPS;BBC3;ARL13B;MSI2;CKS2
JARID1A-20064375 (mouse)	34/2171	0.3882210285128864	0.40166591261722884	2.8245614814764384	-2.576380254338587	NDC80;GTSE1;FANCD2;PRODH;CDC45L;MAGOHB;ESPL1;RECQL5;PNPLA7;IGBP1;KIF2C;KIF15;HMMR;KIF20A;ALDH6A1;TMEM87A;XRCC2;CDCA8;CDCA2;EMG1;CCDC99;PCNA;BCCIP;ORC6L;GINS4;LOXL3;CCDC106;SFRS2;FAM102A;CHMP1B;THBS3;ATAD5;HPS5;CKS2
TBX3-20139965 (mouse)	31/1068	4.192258847298891E-4	6.957985170169687E-4	0.3635566876843585	-2.643220875062175	MYBL2;PPAPDC1A;ACACB;PNPLA7;CD9;NFATC4;GLDC;HAS3;KLF7;ZWILCH;TMTC1;PLEKHA6;SLC9A9;XRCC2;SKP2;LHFP;ADAMTS6;PPM1F;CREB5;S100A8;LEMD1;AADAT;RFC3;POLQ;ADAM19;YPEL2;YPEL3;CTPS;CPD;PCCA;TCP11L2
MEF2A-21415370 (mouse)	27/1048	0.0047583520246288445	0.006498549336493108	0.5370814295727273	-2.704836770001269	ROR1;HSD11B2;KDELR3;SORBS2;SLC8A1;PDK4;TACC3;AURKB;KLF7;NRP1;FANCA;BCL6;PLEKHA6;FOS;MLF1IP;LHFP;AP1S3;ASPM;RBL1;GINS2;ABLIM2;COL4A1;IFIT2;ADAM19;SGOL1;CPD;ANXA11
EWS-FLI1-20517297 (human)	12/574	0.15048421546208238	0.16574067970247783	1.509305552423239	-2.712721480579201	GLUL;MICAL3;ANGPTL4;PBK;GRAMD4;RAD54B;BCL6;C9ORF152;PTHLH;ITGB2;ITGA4;CENPF
PPARG-19300518 (mouse)	8/272	0.0536960400752384	0.06384753023871631	0.9863565747912545	-2.7137208036638105	S100A8;CDCA4;TOP2A;ACSL1;ANGPTL4;LPL;ALDH3A1;CUEDC1
RCOR1-19997604 (mouse)	39/2378	0.27428147934048386	0.29005873257688336	2.1947401623441114	-2.716368117831915	PTX3;LRRC58;E2F8;PLD5;LMNB1;SAA2;CD14;LMBRD1;VTCN1;CCNA2;SPAG5;PUS7;KCNK15;RHOV;S100A9;NUPR1;TIPIN;GABARAPL1;SERPINA5;HIST1H1B;SPRR3;SLC8A1;IGBP1;HIST1H4B;HIST1H4C;HIST1H4D;CASP1;KIF15;MME;BCL6;ZC3H6;KLHL24;PRKCE;LHFP;HIST1H2BE;JAG1;SYT1;DZIP1L;FJX1
TCF4-18268006 (human)	12/470	0.051574241281071784	0.06163121833088078	1.0063007666222903	-2.8041443784897933	TFPI;DUSP10;MAP2;DNM3;HDAC4;LOXL3;EPHA4;FAM72A;FAM84A;PRKCE;TXNIP;CENPF
STAT1-20625510 (human)	21/656	0.0010964498304263865	0.0016798173684096562	0.44291331625148833	-2.829804270380499	PGPEP1;ERBB3;MMP28;HIST1H1D;HIST1H2AC;SH2D5;SIX1;BMP2K;TMEM217;LRRC8C;CD9;S100A8;LEMD1;CHRNA5;EHF;CBX7;STAMBPL1;ITGA4;DNMT1;MUC21;ANXA11
SALL4-18804426_ESC (mouse)	28/1065	0.003128360804482625	0.004504085736574382	0.5244442582940073	-2.8334518903411876	ROR1;MYBL2;HIST1H3H;UPP1;MME;EPHA4;BMF;DEFB1;SACS;BRCA1;PVRL1;CCNE2;EIF5A2;NID2;UNC5B;BMP2K;HMGB3;ANLN;B4GALT5;COL4A1;UHRF1;AKAP12;DDIT4L;CBX7;CPD;PRPS1;KIF18A;ANXA11
ESRRB-18555785 (mouse)	41/1434	7.165341737624141E-5	1.3810618349130403E-4	0.3227020291993264	-2.868010322725052	TFPI;RALGPS1;ST6GALNAC1;CDKN1C;KIF23;GAA;UPP1;GDF15;PRKCDBP;MME;CRIP2;RAD51;TPCN1;KLHL24;LMBRD1;GLRX;ZBTB7C;DDAH2;ODC1;CDC45L;RASA4;TRIP13;WWTR1;RASSF5;ASPM;BMP2K;ANLN;B4GALT5;CRAT;WIPI1;CCDC106;AQP3;SFRS2;LGALS3;SUSD2;CKB;CBX7;PTHLH;LYNX1;CPE;KIF18A
NACC1-18358816 (mouse)	23/769	0.001541282767514515	0.0023167709524274786	0.4781720863501902	-2.9013478150153578	GLUL;ROR1;MYBL2;MB;IGBP1;IFITM1;UPP1;NFATC4;EPHA4;METTL7A;SLC37A2;BMF;CEP55;CDCA3;ODC1;NID2;H2AFX;AKAP12;CBR3;CBX7;MSLN;ARL13B;PTPRB
IRF1-19129219 (human)	6/196	0.07594499172434603	0.08897476971626815	1.2287079342883866	-2.972738969072051	CDCA8;AKAP12;PCNA;YPEL2;RASSF5;MCM7
HCFC1-20581084 (mouse)	11/306	0.0072289396044509305	0.009598425363687624	0.6494648843295758	-3.0175153110757233	CDCA3;BCL2L12;VRK1;GTSE1;CDC45L;TACC3;TIPIN;CASC5;BRCA1;KIF2C;CDC25A
EWS-ERG-20517297 (human)	32/1038	1.2171297994405317E-4	2.2549924191185046E-4	0.36188804867187685	-3.0388440644290213	DCBLD2;DUSP10;VAMP5;PRR15L;KIF15;VSTM2L;KLF7;CRIP2;AURKAPS1;BCL6;DLGAP5;CYP4F12;PHGDH;VIPR1;ITGA4;SLC9A9;FHIT;CCDC146;PGPEP1;C15ORF62;CCNE2;POLA2;CAPN8;WWTR1;GINS2;GINS4;DEPDC6;RAD54B;FAM54A;STAU2;CENPA;LIPK
BMI1-19503595 (mouse)	14/661	0.11943764854169121	0.1340168920256535	1.5206193916281512	-3.0561247759119	RORC;RPS29;BNIPL;MB;NFE2L3;RHOV;AKAP12;SH2D2A;FZD4;TIPIN;PLEKHA6;FAM83E;GLRX;PSRC1
POU5F1-18358816 (mouse)	22/753	0.002541808703366503	0.003704221220149965	0.5460401744865339	-3.0568870107826833	TUBB2C;CDCA7;CDCA2;ROR1;MYBL2;PCNA;HIST1H1B;GRIK4;MB;TACC3;IFITM1;KIF15;AURKB;H2AFX;HAS2;CDC20;HNRPDL;CBX7;LAPTM5;MSLN;PRKCE;CENPO
HOXD13-18407260 (mouse)	8/196	0.010432431150569412	0.013749139681267026	0.7170957760943718	-3.0740311322088774	DLC1;PCNA;COL11A1;TTK;RHBDL2;UPP1;COL4A1;CENPF
NR4A2-19515692 (mouse)	6/207	0.09220303777114057	0.10493583822525046	1.3647869108828383	-3.0767840464439584	STAG3;KLF7;BCCIP;CBX7;CPE;ANLN
HNF4A-19761587 (human)	28/1126	0.006442463509839365	0.008699145643229425	0.6538658187671067	-3.102286293940048	PLCXD2;INHBA;PDK3;IGBP1;C1ORF112;LMNB1;LETMD1;BLNK;EPHA4;SEPP1;AMIGO2;SLC16A4;CORO2A;BMF;GPRC5C;RAD51AP1;FHIT;CDCA2;ERBB2;EIF5A2;CCNB1;UNC5B;H2AFX;XKRX;PCCA;CASC5;BBC3;KPNA2
ZFP42-18358816 (mouse)	40/1480	2.6943955589853684E-4	4.66638071447466E-4	0.4085360206921391	-3.1334535516673756	TCOF1;HIST1H1D;HIST1H1A;KDELC1;HIST1H3D;HIST1H3H;KIF11;GAA;EPHA4;HMMR;ZWILCH;KIF20A;ROBO4;SLC37A2;TMEM80;FOLR1;PSRC1;TUBB2C;EMG1;MAOA;POLA1;BCCIP;CDC45L;NID2;RASSF5;ASS1;CRAT;PLK4;RHOV;HMGA2;SMC4;IFIT2;B3GALT4;AQP3;DEPDC6;SUSD2;CKB;TOP2A;SGOL2;MCM7
VDR-20736230 (human)	8/230	0.02401113143531171	0.030045342476646586	0.9019957864913666	-3.161538186920584	DUSP10;ACSL1;SLC37A2;IFITM1;CD274;IFI44L;TMEM156;RAD51AP1
CDX2-19796622 (mouse)	11/334	0.01302413479666768	0.01682577414272203	0.7789677451722511	-3.1819612472700824	NAV3;YPEL5;BCL6;SLC8A1;CSTA;SNX1;PEG10;ESX1;FBXO32;PTPRB;MUC20
ZFP281-18358816 (mouse)	17/578	0.006985285653212199	0.00932672218501517	0.6823440831559867	-3.1898710070145766	SKP2;GLUL;MYBL2;BCCIP;CYP4X1;KDELC1;HMGA2;UPP1;PRKCDBP;DZIP1L;YPEL3;CBX7;SLC37A2;FOLR1;BMF;PRKCE;GPRC5C
NOTCH1-17114293 (human)	4/134	0.14265340931535656	0.15840146691128648	1.736774187199156	-3.2002192622106254	RBL1;CPE;SNX1;CDC25A
REST-18959480 (mouse)	52/2868	0.07741694807057936	0.08981869217897313	1.3408270110073046	-3.231342375581604	KBTBD8;ANP32E;GRIK4;UCN;HDAC4;E2F7;PLD5;VRK1;LETMD1;CRIP2;RAD51;TMPO;CPLX3;SLC9A9;FHIT;DDAH2;PRODH;PVRL1;DNM3;ADAMTS13;LEMD1;LGALS3;KLHL7;TMPRSS13;PTHLH;CPE;PPL;INCENP;SLC8A1;SYT17;KIF11;HMGN2;BLNK;KLF7;EPHA4;RAB11FIP4;ZBTB16;SNX1;PRKCE;KCNK5;CDCA2;UMODL1;ELAVL3;UNC5B;TNFSF10;ABLIM2;SYT1;POLQ;COL11A1;PPP1R16B;PLCD4;RACGAP1
EED-16625203 (mouse)	23/830	0.0038541939270768702	0.005386855839598666	0.6192871613225088	-3.23502818381447	STAG3;PTX3;LRAT;UCN;CDKN1C;HIST1H3B;HIST1H3D;PTGER4;NRP1;CD14;VIPR1;LMBRD1;LHFP;BCL2L11;PRODH;PCSK9;UNC5B;SIX1;HMGA2;COL4A1;PTHLH;LPL;TNXB
SALL1-21062744 (human)	3/105	0.2082842789152201	0.22423397594926847	2.1714761633714446	-3.2464985243680378	KLHL7;CDCA7;MME
SRF-21415370 (mouse)	31/1634	0.0981863139188055	0.11069117465374771	1.4795227063887193	-3.256445996427551	SERF2;TACC3;E2F7;AHNAK;DHFR;RAD51;CCNDBP1;BCL2L12;SLC27A1;POLR3G;MTHFR;SLC8A1;BST2;KIF15;GDF15;KLF7;EPHA4;TRAPPC6A;TROAP;TUBA1C;PRKCE;TMEM159;TMEM87A;CDCA8;RASA4;WWTR1;ASS1;CDC25A;RFC3;CD274;MCM7
THAP11-20581084 (mouse)	22/864	0.011500139053674504	0.015019307288678722	0.7801252026412846	-3.2752922804353104	ESPL1;TCOF1;GTSE1;HIST1H1B;TACC3;KIF2C;EXO1;VRK1;CLSPN;RAD51;CCDC18;BRCA1;DNMT1;CDCA8;CDCA3;SKP2;BCL2L12;ABLIM2;CDC25A;SFRS2;POLQ;SLC27A1
NANOG-21062744 (human)	25/840	0.0010510593591383825	0.001620665721510151	0.5099287970131486	-3.276250846851231	ROR1;RECQL5;STAC2;HIST1H1B;KIF23;BLNK;ZBTB16;FOLR1;BRCA1;SLC9A9;CDCA8;CCDC106;HMGA2;TMEM45A;DEPDC6;SLC27A1;YPEL2;POLR2D;DDIT4L;NUPR1;PRPS1;ATP6V1B1;PIF1;CENPO;CKS2
ELF1-17652178 (human)	4/133	0.14001808658644738	0.15637533969234074	1.767226650971501	-3.279082225679126	IGBP1;FAM54A;TRAPPC6A;CDC45L
KLF2-18264089 (mouse)	3/102	0.1970796210509587	0.21313135489221324	2.125559487377992	-3.2857889358084265	SIX1;FOS;CD83
KLF5-18264089 (mouse)	3/102	0.1970796210509587	0.21313135489221324	2.149892190265158	-3.3234035621690325	SIX1;FOS;CD83
RCOR2-21632747 (mouse)	11/401	0.040389314303134416	0.04850776943944284	1.1013902996011566	-3.332841519273303	PGPEP1;NID2;BST2;VSTM2L;GDF15;SYT1;HAS3;VRK1;TMPRSS13;MMS22L;SLC10A7
ETS1-20019798 (human)	28/1607	0.21341168310364644	0.22872373211556726	2.2697914744899883	-3.3484881138436804	KBTBD8;VRK1;SPC25;ZNF862;MAGOHB;INCENP;KIF11;KIF15;EXO1;BIRC5;KIF20A;KLHL24;TMEM87A;CCDC146;CDCA8;EMG1;SKP2;ZNF219;RBL1;ABLIM2;CDC25A;N4BP2L2;ESCO2;POLQ;CHMP1B;MCM10;MCM3;RACGAP1
KLF4-18264089 (mouse)	3/102	0.1970796210509587	0.21313135489221324	2.1742248931523243	-3.361018188529638	SIX1;FOS;CD83
ESR1-20079471 (human)	8/216	0.017433321852322114	0.02216257405694141	0.8839843151665316	-3.367405886158911	PGPEP1;ACSL1;GRIK4;MB;WIPI1;DLG5;TMEM87A;CUEDC1
CRX-20693478 (mouse)	15/668	0.077045880176165	0.08981869217897313	1.404982062672724	-3.3859536232311847	TMEM110;YBX2;ANP32E;TMEM201;PLK1;HS3ST2;LMNB1;CTNNBIP1;YPEL2;FAM134B;SMTN;TMEM159;MTHFR;MSI2;CUEDC1
IKZF1-21737484 (human)	5/155	0.08519333086402	0.09789041382933068	1.4703747979125967	-3.4170137741320676	B3GALT4;TUBB;KCNK2;FAM43A;RRM2
NR1I2-20693526 (mouse)	23/939	0.014909208615816488	0.019157531500968498	0.8706814566486031	-3.443596836691328	SERPINE1;ROR1;RALGPS1;DUSP10;SH3PXD2A;PDK4;HDAC4;KIF14;GAA;GDF15;NRP1;ZBTB16;PRKCE;ZBTB7C;FHIT;LSM6;KCNK5;SKP2;MICAL3;CLCF1;RARRES1;TLR5;MSI2
NOTCH1-21737748 (human)	8/245	0.03280519074728609	0.040002247901027424	1.073905719290646	-3.4567088088638336	KCNK5;SERPINE1;IL7R;BCL6;ATP6AP1L;ARL13B;C11ORF82;TMEM158
PHC1-16625203 (mouse)	21/922	0.03747553922568543	0.04546524809613613	1.127652919779899	-3.485357563916196	LRAT;PEG10;UCN;ESX1;CDKN1C;PTGER4;FST;NRP1;CD14;RIOK3;SGPP2;LMBRD1;CDCA3;BCL2L11;CDC45L;SIX1;LOXL3;HMGA2;COL4A1;FZD4;GTF2IRD2
JARID2-20075857 (mouse)	39/1258	2.0104604616817125E-5	4.072034324931604E-5	0.3464181407655406	-3.5018657278248457	TMEM125;PPAPDC1A;LRRC26;PTX3;LRAT;UCN;ESX1;CDKN1C;LRRC8C;PTGER4;HS3ST2;GDF15;FST;HOPX;NRP1;RAB11FIP4;ZBTB16;TMTC1;VIPR1;FAM84A;PRKCE;UBE2C;CD83;ZBTB7C;LHFP;PVRL1;KCNK2;BEAN;UNC5B;SIX1;ODF3B;HMGA2;NR3C2;COL4A1;HS3ST3A1;FJX1;PPP1R16B;PPL;TNXB
MYBL1-21750041 (mouse)	7/161	0.01185921968031368	0.01540409512823353	0.8499811149032837	-3.547074794559923	CDCA8;CDCA3;SKP2;FBP1;SNX1;CDC20;KIF20A
GATA3-20176728 (mouse)	20/834	0.026731264349624504	0.03293181535855803	1.0526459564127733	-3.593013344633712	DUSP10;MYBL2;CDKN1C;KIF2C;GDF15;CRIP2;SLC25A23;CORO2A;CDCA4;ODC1;MICAL3;RRM2;ANLN;B4GALT5;COL4A1;LGALS3;DZIP1L;TJP3;KRT9;MUC20
SOX2-19030024 (mouse)	24/863	0.003063496283264225	0.0044374279496978775	0.6711768986479202	-3.636221902561873	HIST1H1D;FANCD2;TACC3;NFE2L3;IFITM1;PEG10;HIST1H4C;HIST1H3B;NFATC4;TPCN1;PHGDH;BRCA1;KLHL24;TMEM159;MLF1IP;CCNA2;NID2;CCDC106;SFRS2;HNRPDL;CBX7;ATP6V1B1;MCM7;KPNA2
SUZ12-16625203 (mouse)	33/1270	0.0016847203138421955	0.0025066819505495433	0.6305188558565571	-3.776048380952378	ROR1;YBX2;STAC2;PTX3;LRAT;PEG10;UCN;ESX1;LRRC8C;PTGER4;FST;PPARA;NRP1;CD14;VIPR1;LMBRD1;CD83;CUEDC1;SLC9A9;LHFP;BCL2L11;KCNK2;PCSK9;RASSF5;UNC5B;SIX1;BMP2K;LOXL3;HMGA2;COL4A1;FJX1;PTHLH;LPL
TCF3-18467660 (mouse)	34/1388	0.0035811135525857223	0.005034624347458751	0.7231538997511474	-3.8265083787218677	DUSP10;TMEM110;YBX2;LRRC58;PEG10;ESX1;LRRC8C;FST;PLD5;HAS3;LMNB1;AMIGO2;TTK;CDCA4;BCL2L11;PVRL1;CCNE2;EIF5A2;RASSF5;ZBTB1;UNC5B;SIX1;BMP2K;HMGB3;TIMP2;B4GALT5;PNRC1;CLCF1;CCNL2;ABLIM2;ADAM19;YPEL5;CBX7;CPD
NKX2-5-21415370 (mouse)	35/1507	0.006932658793965228	0.009308457594144323	0.8217878580306179	-3.843363647584741	HSD11B2;ELF3;TCOF1;ACSL1;PDK4;VAMP5;HELLS;LRRC8C;EPHA4;NRP1;TPCN1;BLM;PLEKHA6;TUBA1C;UBE2C;TYMS;GLRX;DLC1;CDCA2;CCNA2;MKI67;PCNA;MICAL3;JAG1;BMP2K;PLK1;DLG5;COL4A1;UHRF1;SGOL1;IQCD;PPL;MCM7;MCM6;CENPM
SMAD-19615063 (human)	7/124	0.0031565435749603427	0.004517448589314502	0.7303188192099821	-3.943581341102662	NAV3;SPOCD1;PTHLH;SYTL2;FBXO32;ADAM19;DNM3
STAT3-19079543 (mouse)	25/948	0.004886442845248877	0.0066355672728095555	0.8066276100833323	-4.045488420791748	NOXA1;ESPL1;RECQL5;GRIK4;NR4A2;HAS2;TPD52L1;ROBO4;CORO2A;STAMBPL1;FOS;PRKCE;ZBTB7C;SELENBP1;SPAG5;PRODH;ODC1;KCNK2;PCSK9;CMTM7;UNC5B;PPM1F;DEPDC1B;POLQ;LYNX1
GATA2-20887958 (mouse)	50/1708	6.292741788047381E-6	1.4601604731488582E-5	0.37678079442434226	-4.195220211074655	NDC80;CYP4X1;IL34;IMPA2;NRGN;TTK;BLM;BRCA1;TXNIP;MLF1IP;CUEDC1;CD164L2;PUS7;TMEM201;TMEM217;PLK4;HMGA2;DEPDC1B;LGALS3;NUPR1;GTF2IRD2;HJURP;PLAC8;F3;HIST1H1B;BST2;UPP1;GRAMD4;TUBA4A;AGPAT9;ICAM2;ZBTB16;TPCN1;KLHL24;TUBA1C;ERBB2;UMODL1;HIST1H2BE;FBP1;PNRC1;ABCG1;YPEL3;FZD4;FAM72A;LAPTM5;ATAD5;CD274;HPS5;MCM3;RACGAP1
ELF1-20517297 (human)	29/1020	8.672851508511971E-4	0.0013547787650551378	0.6523671161383754	-4.3083088343451275	ESPL1;CRTC1;MMP28;SERPINA3;AHNAK;CD9;VSTM2L;GDF15;RAB26;CD14;METTL7A;CCNDBP1;TMEM61;CEP55;TYMS;CDCA8;TPX2;BEAN;LOC645166;CRAT;CLCF1;CCNL2;CBR3;CHMP1B;YPEL3;BEST2;SGOL2;HPS5;MUC20
CDKN2AIP-20523734 (mouse)	5/123	0.039614816863370116	0.04781788500174474	1.4225593034152066	-4.325086068007832	FHIT;SYT1;GRIK4;TIMP2;POLR3G
TAL1-20887958 (mouse)	58/2067	3.922343250449766E-6	9.97276634954781E-6	0.37578850502792077	-4.32744985435185	SERF2;TACC3;TMC4;NOP56;BRCA1;FOS;TUBB2C;DDAH2;ODC1;CCNL2;DEPDC1B;FAM43A;GTF2IRD2;DSCC1;TIPIN;HJURP;GLUL;TMEM110;HIST1H1D;HIST1H1B;HIST1H1A;PNPLA7;RELT;KDELC1;HIST1H4B;HIST1H4C;HIST1H4D;SLC35E2;UPP1;RAB26;TUBA4A;TPD52L1;BCO2;TRAPPC6A;ICAM2;BIRC5;PKMYT1;SNHG7;TMEM80;ITGB2;ZC3H6;TUBA1C;PRKCE;ERBB3;PCNA;TLE2;BCCIP;HIST1H2AI;CMTM7;ORC6L;H2AFX;CDC20;SGOL2;FAM72A;PPP1R16B;LAPTM5;MCM6;CKS2
PPARG-20176806 (mouse)	25/837	0.001001902459629272	0.0015549005704636105	0.670277281630565	-4.334243262055578	PLCXD2;YBX2;ANP32E;OPLAH;KIF23;LRRC8C;PRR15L;CD9;GLDC;KLF7;AES;PHGDH;CORO2A;SACS;FOS;TUBA1C;PRKCE;GPRC5C;PECAM1;NOD2;POLA2;RASSF5;TMEM201;MAGOHB;CTNNBIP1
SUZ12-18555785 (mouse)	25/1058	0.01698157554739517	0.02170372489747297	1.1962957264573195	-4.582137281756078	ROR1;LRAT;PEG10;NR4A2;ESX1;FBXO32;FST;PRKCDBP;NRP1;ZBTB16;TMTC1;SGPP2;TMEM158;LHFP;KCNK2;EIF5A2;PCSK9;UNC5B;SIX1;CLCF1;HMGA2;COL4A1;HS3ST3A1;PTHLH;TNXB
SMARCA4-20176728 (mouse)	27/1118	0.01047005615895648	0.013749139681267026	1.077933043655726	-4.620860762395975	PRC1;LRRC58;PNPLA7;LRRC8C;BLNK;KLF7;EPHA4;SPINK8;ROBO4;SLC37A2;FOLR1;LMBRD1;TXNIP;ODC1;BUB1;ZBTB1;UNC5B;PNRC1;SFRS2;LGALS3;TOP2A;EHF;PTHLH;GABARAPL1;BBC3;KRT9;MTHFR
PHF8-20622854 (human)	43/1490	3.895850996667155E-5	7.632035968880739E-5	0.5068333094159424	-4.8050690828045255	DUSP10;ELF3;ANP32E;PDK3;CDKN1C;E2F7;KIF15;EXO1;DHFR;TPCN1;ZWILCH;KIF20B;PHGDH;NOP56;SNHG7;CD83;TUBB2C;CDCA8;EMG1;BCL2L11;PCNA;CCNE2;HN1;TRIP13;RBL1;TIMP2;PLK4;LOXL3;CDC25A;SMC4;PDLIM7;H2AFZ;CHRNA5;H2AFX;DEPDC1;SFRS2;FAM102A;SKA3;FAM43A;KLHL7;IQCD;CENPM;CKS2
RAD21-21589869 (mouse)	57/2036	5.094330428802842E-6	1.2552010025607E-5	0.4329087329847632	-4.88564767332708	HSD11B2;MMP28;YBX2;CCDC64B;ATP6AP1L;AHNAK;CLSPN;NRP1;SLC37A2;EML2;CD82;NACC2;CSGALNACT1;ADAMTS6;CAPN8;TMEM201;TMEM217;PADI2;IFIT2;FAM43A;SUSD2;CKB;CTNNBIP1;GTF2IRD2;LYNX1;CPE;IQCD;CENPO;CENPM;SH3PXD2A;RELT;HIST1H4C;DENND5B;PTGER4;GRAMD4;NFATC4;PRKCDBP;MME;RAB11FIP4;BCL6;PHGDH;ROBO4;TROAP;UMODL1;RASSF5;UNC5B;FBP1;ASS1;ANLN;ABLIM2;AADAT;RFC3;POLQ;FJX1;CBR3;THBS3;MCM3
TBX5-21415370 (mouse)	55/2296	4.00206373364451E-4	6.724893655161717E-4	0.6788508737061323	-4.958682675889744	CDR2L;CCDC64B;LRRC58;TACC3;AHNAK;GAA;HAS3;VRK1;AES;RAD51;SLC37A2;BLM;STAMBPL1;TMPO;CCNDBP1;CPLX3;KIFC1;PGPEP1;SPAG5;EIF5A2;POLA2;DNM3;BMP2K;CCNL2;NR3C2;SCLT1;SMC2;IFIT2;AQP3;SLC27A1;POLR3G;KPNA2;ESPL1;F3;DCBLD2;CRTC1;TMEM110;KDELR3;BST2;VAMP5;HELLS;WISP2;PPARA;BIRC5;TROAP;PRKCE;PSRC1;CDCA7;ERBB2;FOSL1;STAU2;TLR5;CBX7;PAQR6;ARL13B
ZNF652-21678463 (human)	5/112	0.02848851763594073	0.03491669597430684	1.4874879656775923	-4.990210004487975	H2AFX;PNPLA7;DUSP10;CRIP2;CENPE
MYC-20876797 (human)	34/1406	0.00433222925151508	0.005984987231861874	0.9943009262235071	-5.089330358088917	ESPL1;ACACB;HIST1H1D;ACSL1;SLC8A1;PRC1;E2F7;KIF2C;PTGER4;PLD5;EPHA4;SLC16A4;TMTC1;STAMBPL1;FAM84A;LMBRD1;SHCBP1;MLF1IP;FHIT;RPS29;TPX2;DNM3;JAG1;SIX1;ADAMTS13;NR3C2;TMEM45A;PTPN22;H2AFZ;AADAT;RFC3;CDKN3;PTHLH;HRASLS2
JARID2-20064375 (mouse)	26/1117	0.01784020660086167	0.022559837976751002	1.3875665774644363	-5.2610752815864945	PPAPDC1A;SH3PXD2A;PTX3;SLC8A1;NR4A2;CDKN1C;PTGER4;HS3ST2;FST;PLD5;HAS2;HAS3;NRP1;RAB11FIP4;ZBTB16;TMTC1;CD83;ZBTB7C;RASSF5;JAG1;UNC5B;HMGA2;COL4A1;HS3ST3A1;FJX1;PTHLH
CTCF-18555785 (mouse)	41/1568	4.327067459774095E-4	7.083350156753484E-4	0.7314974533303135	-5.305253594975666	NOXA1;GRIK4;FBXO32;GAA;HS3ST2;LETMD1;DHFR;TTK;SLC25A23;SLC37A2;CCNA2;PVRL1;CAPN8;ANGPTL4;PDLIM7;DEPDC1B;HNRPDL;CPE;PPL;SMTN;ELF3;PEG10;KIF23;PSMC3IP;TPD52L1;VIPR1;ITGA4;KLHL24;SHCBP1;DLC1;RPS29;PPFIBP2;RASSF5;ASS1;GINS4;DLG3;CDC25A;AADAT;RFC3;ABCG1;YPEL5
MYC-19915707 (human)	67/2979	5.119694587383373E-4	8.267614908004231E-4	0.7502771431760237	-5.325462891264443	RORC;DUSP10;ANP32E;HDAC4;AHNAK;FST;PLD5;SAA2;SAA1;CD14;CEP78;PLEKHA6;CD82;CUEDC1;KIFC1;TUBB2C;MKI67;SYTL2;PLK4;CLCF1;PBK;CCNL2;HS3ST3A1;DEPDC6;SLC27A1;CPE;LPL;GABARAPL1;TNXB;ANXA11;INCENP;GLUL;HIST1H1B;CKAP2L;SLC8A1;HELLS;CLDN8;KIF2C;PTGER4;UPP1;BBOX1;RAB15;TRAPPC6A;BIRC5;ITGB2;CORO2A;DNMT1;KLHL24;SELENBP1;MICAL3;HIST1H2AC;HIST1H2BE;UNC5B;ANLN;TNFSF10;LOXL3;TMEM45A;CREB5;YPEL5;THBS3;MCM10;SGOL1;P…
ESR1-15608294 (human)	6/98	0.004221452460884682	0.0058658554543688304	1.0388205382220004	-5.338090437500423	SERPINE1;BRCA1;PLEKHA6;CKB;FOS;MCM3
RUNX1-20887958 (mouse)	30/1120	0.0017354245953774504	0.0025602869030568556	0.9521618960746785	-5.682155566247237	ACSL1;OPLAH;RELT;SLC35E2;NRGN;UPP1;NFATC4;TUBA4A;ICAM2;DLGAP5;BRCA1;FOS;TMEM87A;TXNIP;MLF1IP;CUEDC1;CMTM7;ASPM;ANGPTL4;PADI2;HMGA2;PTPN22;DEPDC1B;YPEL5;GTF2IRD2;FAM72A;LAPTM5;ATAD5;CENPO;CKS2
EGR1-19374776 (human)	3/68	0.08495490362473282	0.09789041382933068	2.4594339806827348	-5.715494988415137	RAD51;HMMR;BRCA1
SIN3A-21632747 (mouse)	33/1186	5.636539710332768E-4	9.04116101187605E-4	0.8687127332940526	-6.088419037867635	HSD11B2;ELF3;BST2;UCN;E2F8;KIF2C;AHNAK;TMEM38A;VSTM2L;GDF15;CRIP2;RAD51;TTK;CCDC18;SACS;EML2;GLRX;TXNIP;ZBTB7C;PGPEP1;BCL2L12;RRM2;ANGPTL4;GINS2;FOSL1;DEPDC1B;RFC3;LGALS3;FAM43A;BEST2;KLHL7;BBC3;SLC10A7
GLI1-17442700 (mouse)	4/73	0.026086566583530566	0.03230409022520106	1.9310009478781782	-6.628279364188794	FHIT;PRKCE;ROR1;SLC16A4
ZNF263-19887448 (human)	4/71	0.02396063452084558	0.030045342476646586	1.9186269476523525	-6.7248788212780095	ATP6V1B1;PCSK9;ACACB;GDF15
CIITA-18437201 (human)	3/59	0.06172371423276568	0.07302954307738117	2.6945473539381872	-7.051337312428554	TLR4;FOS;SFRS2
GFI1B-20887958 (mouse)	51/1871	3.2027142063453256E-5	6.378739127637773E-5	0.8252058407427625	-7.9714513005498695	MMP28;OPLAH;LRRC58;TMEM38A;LMNB1;LETMD1;LMBRD1;CEP55;KIFC1;DDAH2;BCL2L11;ADAMTS6;RRM2;DEPDC1B;KLHL7;PIF1;HJURP;TCP11L2;GLUL;TMEM110;HIST1H1D;HIST1H1B;HIST1H1A;RELT;KIF15;VSTM2L;GDF15;RAB26;LPAR6;TUBA4A;BIRC5;SNHG7;CCDC18;TMEM80;ZC3H6;CDCA7;CDCA3;RPS29;ABLIM2;CDC25A;PTPN22;H2AFX;FAM102A;ABCG1;YPEL3;FZD4;FAM72A;LAPTM5;BBC3;CD274;CKS2
SETDB1-19884257 (mouse)	60/2353	4.1926727718965855E-5	8.146738150270601E-5	0.8982791928317888	-8.457575131081045	CYP4X1;LRAT;FBXO32;PLD6;CSTA;TMPO;SLPI;LSM6;ODC1;MKI67;KCNK15;CCNE2;FAM167A;EIF5A2;TMEM201;RHOV;FRMD5;HMGA2;S100A9;LEMD1;SUSD2;KLHL7;TMPRSS13;CPE;PXMP4;SMTN;CENPA;CENPM;CENPF;CENPE;STAG3;CRTC1;NCAPG2;STAC2;CEACAM1;ABCA6;PEG10;NR4A2;KIF23;KIF2C;UPP1;NFATC4;GDF15;GLDC;BCL6;SNHG7;KLHL24;FAM134B;ZBTB7C;PSRC1;KCNK2;NID2;KANK4;GINS4;COL4A1;CBR3;BEST2;CBX7;MCM3;MSI2
SFPI1-20887958 (mouse)	63/2369	7.742678975843422E-6	1.7623812145015027E-5	0.792863901766884	-8.678894102206966	MYBL2;SERF2;ANP32E;TACC3;LRRC8C;AHNAK;TMEM38A;VRK1;AES;RAD51;NOP56;FAM118A;FOS;LMBRD1;KIFC1;BCL2L11;ODC1;CCNE2;EIF5A2;SH2D5;CLCF1;PADI2;CCNL2;FAM43A;GTF2IRD2;TIPIN;SAP18;MTHFR;GLUL;ACSL1;RELT;HIST1H3H;KIF15;SLC35E2;HNRNPA3;AGPAT9;MBD5;BIRC5;KIF20B;PKMYT1;ITGB2;PSRC1;CDCA7;HIST1H2AI;ZBTB1;ASPM;ORC6L;ABLIM2;UHRF1;FAM102A;ABCG1;RAD54B;CHMP1B;YPEL5;FZD4;SGOL2;PRPS1;PPP1R16B;LAPTM5;CTSC;INF2;KIF18A;CK…
FLI1-20887958 (mouse)	50/2030	4.0236811409545E-4	6.724893655161717E-4	1.286979412401591	-9.400772339972143	GTSE1;E2F8;TMEM38A;RAD51;RIOK3;SLC37A2;CCNDBP1;TXNIP;MLF1IP;KIFC1;ADAMTS6;B4GALT5;PLK4;ADAMTS13;IFIT2;DEPDC1B;NUPR1;SAP18;CENPA;CENPO;TCP11L2;SERPINE1;HIST1H1D;HIST1H1B;RELT;HIST1H4C;SLC35E2;RAB26;TUBA4A;BCO2;ITGB2;ITGA4;PRKCE;HIST1H2BK;CDCA3;PCNA;HIST1H2BE;HIST1H2AI;CMTM7;ABLIM2;PTPN22;RFC3;POLQ;YPEL3;TLR4;PPP1R16B;LAPTM5;CD274;HPS5;CKS2
BP1-19119308 (human)	1/18	0.24309420724277678	0.25822006902677175	7.258689332401072	-9.82785216910238	LAPTM5
GABP-19822575 (human)	57/2639	0.003180780196819942	0.004525038494285513	1.9706441603768812	-10.63779177477536	MYBL2;LRRC26;FANCD2;LRRC58;HDAC4;RIOK3;PACS2;CEP55;MLF1IP;KIFC1;TUBB2C;CCNE2;POLA2;FAM166A;B4GALT5;PLK4;PLK1;CCNL2;ADAMTS13;B3GALT4;DSCC1;SAP18;KPNA2;MTHFR;CENPO;CRTC1;TCOF1;SYT17;KIF23;PSMC3IP;KIF11;TRDMT1;EXO1;FANCA;C7ORF29;KIF20B;ZC3H6;DNMT1;FAM83E;TGM1;XRCC2;CDCA3;CCDC99;ZNF219;TPX2;JAG1;PNRC1;CCDC106;SFRS2;ATAD3B;FZD4;CTPS;SGOL2;CD274;HPS5;MCM7;KIF18A
REST-21632747 (mouse)	53/2339	0.0016886016486965542	0.0025066819505495433	1.8159417530171749	-10.87530349440384	CDR2L;GRIK4;IL34;UCN;CDKN1C;HDAC4;E2F7;HS3ST2;VRK1;LETMD1;CRIP2;HOPX;RAD51;TMPO;CD82;SLC9A9;PVRL1;MKI67;LEMD1;LGALS3;KLHL7;TMPRSS13;PTHLH;SYT17;VSTM2L;HNRNPA3;BLNK;KLF7;EPHA4;RAB11FIP4;TPCN1;TUBA1C;PRKCE;SHCBP1;DLC1;KCNK5;CCDC99;RPS29;KCNK2;WDR62;UMODL1;WWTR1;KANK4;SYT1;NAV3;SKA1;YPEL5;BEST2;FZD4;TLR4;MMS22L;MSI2;PLCD4
TP63-17297297 (human)	3/40	0.024593242830414308	0.030613463731609475	3.1277054534322644	-10.904167612531557	JAG1;CLCA2;CDKN1C
ZFX-18555785 (mouse)	71/3249	7.504137649802613E-4	0.0011956592655352164	1.674940709946578	-11.27077244527926	RALGPS1;MYBL2;ANP32E;CDKN1C;GAA;TMC4;VRK1;DHFR;CUEDC1;PGPEP1;B3GALT4;KPNA2;DCBLD2;HIST1H1B;HIST1H1A;CKAP2L;HIST1H4D;KIF23;AURKB;TRAPPC6A;ROBO4;SNX1;KLHL24;GPRC5C;CDCA7;RPS29;BUB1;ZBTB1;RBL1;ORC6L;TMEM45A;H2AFX;SFRS2;MCM6;SERF2;CDR2L;TACC3;IMPA2;AHNAK;CLSPN;AES;RAD51;ZWILCH;PACS2;BLM;LSM6;CCNA2;PUS7;CCNE2;PLK4;ADAM19;TIPIN;GABARAPL1;INCENP;GLUL;TRDMT1;GLDC;FANCA;TMEM80;SKP2;TRIP13;CMTM7;CCDC106;CD…
SIN3B-21632747 (mouse)	111/4302	7.390909593739197E-9	2.993944733735031E-8	0.8882720330763868	-15.388503683616616	HSD11B2;FANCD2;E2F7;E2F8;GAA;HAS3;VRK1;LETMD1;CEP78;FAM118A;TMPO;SGPP2;FOS;CUEDC1;PGPEP1;PRODH;PVRL1;EIF5A2;PBK;PPM1F;ALDH3A1;LEMD1;FAM43A;SLC27A1;KLHL7;TMPRSS13;PTHLH;IQCD;DSCC1;PTPRB;CENPO;ANXA11;CENPW;SERPINE1;KDELR3;SH3PXD2A;HIST1H1D;MB;BST2;HIST1H4B;HIST1H4C;HIST1H4D;NR4A2;HIST1H3B;KIF2C;KIF14;KIF11;KIF15;UPP1;GRAMD4;NFATC4;VSTM2L;GDF15;HMGN2;KLF7;TRAPPC6A;RAB11FIP4;KIF20B;KIF20A;SNHG7;TUBA1…
